# Supplementary material for: Trichodesmium physiological ecology and phosphate reduction in the western Tropical South Pacific
Source: Copernicus journal article supplement (doi:10.5194/bg-2018-143), 2018-04-11
Supplement: Supplementary file 1 [file bg-2018-143-supplement.zip]

Archive with 6 entries (6 files):
- supp_table1_geochem_summary.xlsx
- supp_table2_OG_counts.xlsx
- supp1_kegg_metaG-01.png
- supp2_ppm_ali-01.png
- supp3_ppm_tree-01.png
- Supplemental_tables_figures_legends.pdf
