# Supplementary material for: Trichodesmium physiological ecology and phosphate reduction in the western Tropical South Pacific
Source: Copernicus journal article supplement (doi:10.5194/bg-2018-143), 2018-04-11
Supplement: Supplementary file 1 [file bg-2018-143-supplement.zip › supp_table2_OG_counts.xlsx]

## Sheet: supp_table_OG_counts_wAnnot.csv
OG	SD2 Microbiome	SD6 Microbiome	SD9 Microbiome	LDB1 Microbiome	LDB2 Microbiome	LDB3 Microbiome	SD2 Tricho.	SD6 Tricho.	SD9 Tricho.	LDB1 Tricho.	LDB2 Tricho.	LDB3 Tricho.	Most abundant annotation
OG_0	19.05	20.7	33.45	64.7	58.4	23.47	0	0	0	0	0	0	UniRef90_A0A098S3G5_Uncharacterized_protein_n=1_Tax=Phaeodactylibacter_xiamenensis_RepID=A0A098S3G5_9SPHI
OG_1	0.46	6.02	3.15	10.03	8.42	11.47	2.63	27.97	21.4	59.26	35.48	46.59	UniRef90_A0A091E5I4_Uncharacterized_protein_n=1_Tax=Fukomys_damarensis_RepID=A0A091E5I4_FUKDA
OG_10	49.57	27.3	92.94	15.63	9.17	5.28	3429.5	3125.03	1872.88	4911.07	2432.69	1102.25	UniRef90_A0A085FJK2_Uncharacterized_protein_n=1_Tax=Bosea_sp._LC85_RepID=A0A085FJK2_9BRAD
OG_100	1.18	4.55	2.18	5.36	2.33	1.31	60.8	89.69	85.04	39.5	44.96	14.14	UniRef90_A0A098S8W5_Magnesium_chelatase_n=2_Tax=Phaeodactylibacter_xiamenensis_RepID=A0A098S8W5_9SPHI
OG_1000	0.09	0.59	0	0	0.13	0	352.69	406.3	150.76	312.76	361.14	74.06	UniRef90_Q111G7_3-dehydroquinate_dehydratase_n=2_Tax=Trichodesmium_erythraeum_RepID=AROQ_TRIEI
OG_10000	0	0	0	0.08	0.13	0	0	0	0	0	0	0	UniRef90_I0AJB7_Uncharacterized_protein_n=1_Tax=Ignavibacterium_album_(strain_DSM_19864_/_JCM_16511_/_NBRC_101810_/_Mat9-16)_RepID=I0AJB7_IGNAJ
OG_10001	0	0	0	0.24	0.26	0.29	0	0	0	0	0	0	UniRef90_A0A099Y4N6_Uncharacterized_protein_n=1_Tax=Polaribacter_sp._Hel1_85_RepID=A0A099Y4N6_9FLAO
OG_10002	0.05	0	0	0.08	0.52	0.15	0	0	0	0	0	0
OG_10003	0	0.15	0	0.24	0.13	0	0	0	0	0	0	0
OG_10004	0.05	0.15	0	0.4	0.13	0	0	0	0	0	0	0	UniRef90_A0A098SAT5_Uncharacterized_protein_n=1_Tax=Phaeodactylibacter_xiamenensis_RepID=A0A098SAT5_9SPHI
OG_10005	0	0	0	0	0	0	0	0	0	0	0	0	UniRef90_UPI000375C9A1_hypothetical_protein_n=1_Tax=Flexithrix_dorotheae_RepID=UPI000375C9A1
OG_10006	0	0	0	0.16	0	0	0	0	0	0	0	0	UniRef90_UPI00036A469D_hypothetical_protein_n=1_Tax=Flexithrix_dorotheae_RepID=UPI00036A469D
OG_10007	0.05	0.44	0	0.24	0	0.29	0	0	0	0	0	0	UniRef90_A0A074KTC0_Uncharacterized_protein_n=1_Tax=Anditalea_andensis_RepID=A0A074KTC0_9BACT
OG_10008	0	0	0	0.08	0.26	0	0	0	0	0	0	0
OG_10009	0	0	0	0.16	0	0	0	0	0	0	0	0	UniRef90_G0L1W0_Major_facilitator_family_transporter_n=1_Tax=Zobellia_galactanivorans_(strain_DSM_12802_/_CIP_106680_/_NCIMB_13871_/_Dsij)_RepID=G0L1W0_ZOBGA
OG_1001	0.05	0.29	0.17	0.16	0.26	0	35.11	42.86	23.53	67.41	58.92	15.16	UniRef90_A0A098S312_Phosphopantetheine_adenylyltransferase_n=1_Tax=Phaeodactylibacter_xiamenensis_RepID=A0A098S312_9SPHI
OG_10010	0	0	0	0.08	0	0	0	0	0	0	0	0	UniRef90_F0RDX6_Carbohydrate_binding_family_6_n=4_Tax=Cellulophaga_RepID=F0RDX6_CELLC
OG_10011	0	0	0	0	0	0	0	0	0	0	0	0	UniRef90_A1ZQK6_Uncharacterized_protein_n=1_Tax=Microscilla_marina_ATCC_23134_RepID=A1ZQK6_9BACT
OG_10012	0	0	0	0.16	0.13	0	0	0	0	0	0	0	UniRef90_UPI0004256A25_haloacid_dehalogenase_n=1_Tax=Dyadobacter_alkalitolerans_RepID=UPI0004256A25
OG_10013	0.05	0	0	0.08	0	0	0	0	0	0	0	0	UniRef90_A0A098SA86_Uncharacterized_protein_n=1_Tax=Phaeodactylibacter_xiamenensis_RepID=A0A098SA86_9SPHI
OG_10014	0.05	0	0	0.4	0.52	0.44	0	0	0	0	0	0
OG_10015	0	0	0	0.08	0	0.29	0	0	0	0	0	0	UniRef90_UPI00036FFF92_hypothetical_protein_n=1_Tax=Spirosoma_luteum_RepID=UPI00036FFF92
OG_10016	0	0	0	0	0	0	0	0	0	0	0	0	UniRef90_A0A075R2S4_Uncharacterized_protein_n=2_Tax=Brevibacillus_laterosporus_RepID=A0A075R2S4_BRELA
OG_10017	0	0	0	0	0.13	0.15	0	0	0	0	0	0	UniRef90_A0A0B8XT45_Rod_shape-determining_protein_MreD_n=2_Tax=Pedobacter_glucosidilyticus_RepID=A0A0B8XT45_9SPHI
OG_10018	0	0	0	0	0	0	0	0	0	0	0	0
OG_10019	0.05	0.29	0	0.08	0.39	0.15	0	0	0	0	0	0	UniRef90_A0A085Z1N4_AP_endonuclease_n=1_Tax=Chryseobacterium_formosense_RepID=A0A085Z1N4_9FLAO
OG_1002	51.27	326.3	303.02	551.71	444.22	291.88	4687.05	72547.6	8840.48	12170.4	5561.92	964.71	UniRef90_Q10VT7_Photosystem_I_P700_chlorophyll_a_apoprotein_A1_n=1_Tax=Trichodesmium_erythraeum_(strain_IMS101)_RepID=PSAA_TRIEI
OG_10020	0	0	0	0	0.13	0.15	0	0	0	0	0	0	UniRef90_UPI000370945C_hypothetical_protein_n=1_Tax=Segetibacter_koreensis_RepID=UPI000370945C
OG_10021	0	0	0	0	0.13	0	0	0	0	0	0	0
OG_10022	0	0	0	0	0.13	0	0	0	0	0	0	0	UniRef90_A0A076HPP2_Uncharacterized_protein_n=1_Tax=Hymenobacter_sp._APR13_RepID=A0A076HPP2_9BACT
OG_10023	0.14	0.15	0	0.16	0.39	0	0	0	0	0	0	0	UniRef90_A0A098SB62_Uncharacterized_protein_n=1_Tax=Phaeodactylibacter_xiamenensis_RepID=A0A098SB62_9SPHI
OG_10024	0	0	0	0.24	0.13	0	0	0	0	0	0	0
OG_10025	0	0	0	0	0	0	0	0	0	0	0	0	UniRef90_UPI0004DF5E2B_hypothetical_protein_n=1_Tax=Arenibacter_algicola_RepID=UPI0004DF5E2B
OG_10026	0.05	0	0	0.32	0	0	0	0	0	0	0	0
OG_10027	0	0	0	0	0	0	0	0	0	0	0	0	UniRef90_W2UQV1_Dihydrodipicolinate_synthetase_n=1_Tax=Zhouia_amylolytica_AD3_RepID=W2UQV1_9FLAO
OG_10028	0.05	0	0	0.08	0.39	0	0	0	0	0	0	0	UniRef90_UPI000411EB40_hypothetical_protein_n=1_Tax=Runella_zeae_RepID=UPI000411EB40
OG_10029	0	0	0	0.16	0.26	0.15	0	0	0	0	0	0	UniRef90_A8ZXK4_YD_repeat_protein_n=2_Tax=Desulfococcus_RepID=A8ZXK4_DESOH
OG_1003	0.9	0.59	2.02	0.16	0.26	0	90.46	155	40.84	72.85	49.87	15.6	UniRef90_A0A098S3L5_Nitrogen_regulatory_protein_P-II_1_n=1_Tax=Phaeodactylibacter_xiamenensis_RepID=A0A098S3L5_9SPHI
OG_10030	0.09	0	0	0.72	1.94	0.87	0	0	0	0	0	0	UniRef90_D0LZM6_Histidine_kinase_n=2_Tax=Haliangium_ochraceum_RepID=D0LZM6_HALO1
OG_10031	0.05	0	0	0.08	0	0.29	0	0	0	0	0	0	UniRef90_D0LV01_Histidine_kinase_n=2_Tax=Haliangium_ochraceum_RepID=D0LV01_HALO1
OG_10032	0.09	0	0	0.4	1.16	1.02	0	0	0	0	0	0	UniRef90_A0A026VW83_Acetylcholine_receptor_subunit_alpha-like_protein_(Fragment)_n=1_Tax=Cerapachys_biroi_RepID=A0A026VW83_CERBI
OG_10033	0	0	0	0.32	0	0.29	0	0	0	0	0	0	UniRef90_UPI000368AD2C_hypothetical_protein_n=1_Tax=Nodosilinea_nodulosa_RepID=UPI000368AD2C
OG_10034	0	0	0	0	0	0	0	0	0	0	0	0	UniRef90_UPI000367E8A3_hypothetical_protein_n=1_Tax=Methylocystis_parvus_RepID=UPI000367E8A3
OG_10035	0	0	0	0	0	0	0	0	0	0	0	0	UniRef90_UPI000487A323_hypothetical_protein_n=1_Tax=Crocinitomix_catalasitica_RepID=UPI000487A323
OG_10036	0	0.29	0	0.16	0	0	0	0	0	0	0	0	UniRef90_UPI00036AED52_hypothetical_protein_n=1_Tax=Lewinella_persica_RepID=UPI00036AED52
OG_10037	0	0	0	0.24	0.26	0.29	0	0	0	0	0	0	UniRef90_UPI00058CD5E4_hypothetical_protein_n=1_Tax=Psychroserpens_damuponensis_RepID=UPI00058CD5E4
OG_10038	0.05	0.15	0	0.32	0.26	0.44	0	0	0	0	0	0	UniRef90_G2SK86_Uncharacterized_protein_n=2_Tax=Rhodothermus_marinus_RepID=G2SK86_RHOMR
OG_10039	0	0	0.17	0	0	0.44	0	0	0	0	0	0	UniRef90_A1ZYT5_Uncharacterized_protein_n=1_Tax=Microscilla_marina_ATCC_23134_RepID=A1ZYT5_9BACT
OG_1004	0.66	2.5	2.18	5.2	4.91	5.39	0	0	0	0	0	0	UniRef90_UPI0004766F33_hypothetical_protein_n=1_Tax=Lewinella_cohaerens_RepID=UPI0004766F33
OG_10040	0	0.15	0	0	0.52	0	0	0	0	0	0	0	UniRef90_UPI000371E0F2_hypothetical_protein_n=1_Tax=Flexithrix_dorotheae_RepID=UPI000371E0F2
OG_10041	0	0	0	0.16	0.26	0	0	0	0	0	0	0
OG_10042	0	0	0	0	0.26	0	0	0	0	0	0	0	UniRef90_S7VHN8_Uncharacterized_protein_n=1_Tax=Cyclobacterium_qasimii_M12-11B_RepID=S7VHN8_9BACT
OG_10043	0.09	2.2	2.02	0.32	0.65	0.44	0	0	0	0	0	0	UniRef90_A1ZWI1_Uncharacterized_protein_n=1_Tax=Microscilla_marina_ATCC_23134_RepID=A1ZWI1_9BACT
OG_10044	0	0	0	0.08	0	0	0	0	0	0	0	0	UniRef90_A0A076HWD6_Uncharacterized_protein_n=1_Tax=Hymenobacter_sp._APR13_RepID=A0A076HWD6_9BACT
OG_10045	0	0.15	0	0	0.13	0	0	0	0	0	0	0	UniRef90_M7N7Z9_Uncharacterized_protein_n=2_Tax=Cesiribacter_RepID=M7N7Z9_9BACT
OG_10046	0	0.15	0	0.16	0	0	0	0	0	0	0	0	UniRef90_UPI0003A7E48B_nitrilase_n=1_Tax=Flexithrix_dorotheae_RepID=UPI0003A7E48B
OG_10047	0	0	0	0.16	0	0	0	0	0	0	0	0
OG_10048	0	0	0	0.16	0	0	0	0	0	0	0	0	UniRef90_A9GXB7_PolyA_polymerase_related_protein_n=3_Tax=Sorangium_cellulosum_RepID=A9GXB7_SORC5
OG_10049	0	0.15	0	0.16	0	0	0	0	0	0	0	0	UniRef90_A0A0E3L0R9_CRISPR-associated_RAMP_Cmr4_n=2_Tax=Methanosarcina_thermophila_RepID=A0A0E3L0R9_METTE
OG_1005	0.24	0.88	0.5	1.28	0.52	0	779.01	1139.05	340.84	177.05	251.18	61.52	UniRef90_A0A098S278_NAD(P)_transhydrogenase_subunit_beta_n=1_Tax=Phaeodactylibacter_xiamenensis_RepID=A0A098S278_9SPHI
OG_10050	0	0.15	0	0	0	0	0	0	0	0	0	0	UniRef90_A0A0C2W220_Uncharacterized_protein_n=1_Tax=Sulfurovum_sp._FS08-3_RepID=A0A0C2W220_9PROT
OG_10051	0	0	0	0	0	0	0	0	0	0	0	0	UniRef90_I3TUH1_TetR_family_transcriptional_regulator_n=1_Tax=Tistrella_mobilis_(strain_KA081020-065)_RepID=I3TUH1_TISMK
OG_10052	0.05	0.15	0	0.32	0	0	0	0	0	0	0	0	UniRef90_A0A098S2N7_Uncharacterized_protein_n=1_Tax=Phaeodactylibacter_xiamenensis_RepID=A0A098S2N7_9SPHI
OG_10053	0	0	0	0.16	0.26	0	0	0	0	0	0	0	UniRef90_F4L621_Uncharacterized_protein_n=1_Tax=Haliscomenobacter_hydrossis_(strain_ATCC_27775_/_DSM_1100_/_LMG_10767_/_O)_RepID=F4L621_HALH1
OG_10054	0	0	0	0	0.26	0	0	0	0	0	0	0	UniRef90_B9J6B4_Transposase_n=51_Tax=Bacillus_RepID=B9J6B4_BACCQ
OG_10055	0	0	0	0	0	0	0	0	0	0	0	0	UniRef90_UPI00034774CE_hypothetical_protein_n=1_Tax=Flavobacterium_sp._WG21_RepID=UPI00034774CE
OG_10056	0	0	0	0	0	0	0	0	0	0	0	0	UniRef90_T3D8G2_Bacterial_regulatory_helix-turn-helix_s,_AraC_family_protein_n=1_Tax=Peptoclostridium_difficile_CD160_RepID=T3D8G2_PEPDI
OG_10057	0	0	0	0.16	0	0	0	0	0	0	0	0	UniRef90_UPI00069EDEEE_ATP-dependent_helicase_n=1_Tax=Roseivirga_sp._D-25_RepID=UPI00069EDEEE
OG_10058	0	0	0	0	0	0	0	0	0	0	0	0	UniRef90_A0A0G3M2X6_Histidine_kinase_n=6_Tax=Chryseobacterium_RepID=A0A0G3M2X6_9FLAO
OG_10059	0	0	0	0.24	0	0	0	0	0	0	0	0	UniRef90_A1ZKY4_Thioesterase_superfamily_n=2_Tax=Microscilla_marina_RepID=A1ZKY4_9BACT
OG_1006	0.19	0.15	0	0.24	0.65	0.29	1.66	5.28	4.71	4.32	2.84	0.73	UniRef90_UPI00036D6EE7_hypothetical_protein_n=1_Tax=Lewinella_cohaerens_RepID=UPI00036D6EE7
OG_10060	0	0	0	0	0	0	0	0	0	0	0	0	UniRef90_A0A090Q0N0_L-tyrosine_decarboxylase_n=1_Tax=Nonlabens_sediminis_RepID=A0A090Q0N0_9FLAO
OG_10061	0	0	0	0	0	0	0	0	0	0	0	0
OG_10062	0.05	0.15	0	0	0.13	0	0	0	0	0	0	0	UniRef90_A0A023BVK0_Uncharacterized_protein_n=1_Tax=Aquimarina_atlantica_RepID=A0A023BVK0_9FLAO
OG_10063	0	0	0	0.08	0	0.15	0	0	0	0	0	0	UniRef90_UPI000697EE2C_hypothetical_protein_n=1_Tax=Aureispira_sp._CCB-QB1_RepID=UPI000697EE2C
OG_10064	0	0	0	0	0.13	0	0	0	0	0	0	0	UniRef90_I0AGT3_Uncharacterized_protein_n=1_Tax=Ignavibacterium_album_(strain_DSM_19864_/_JCM_16511_/_NBRC_101810_/_Mat9-16)_RepID=I0AGT3_IGNAJ
OG_10065	0	0	0	0	0	0	0	0	0	0	0	0	UniRef90_UPI0003829354_hypothetical_protein_n=1_Tax=Lewinella_persica_RepID=UPI0003829354
OG_10066	0	0	0	0	0	0	0	0	0	0	0	0	UniRef90_K9Q0E7_Uncharacterized_protein_n=1_Tax=Leptolyngbya_sp._PCC_7376_RepID=K9Q0E7_9CYAN
OG_10067	0	0	0	0	0	0	0	0	0	0	0	0	UniRef90_UPI000697E05B_hypothetical_protein_n=1_Tax=Rhodovulum_sulfidophilum_RepID=UPI000697E05B
OG_10068	0	0	0	0.08	0	0	0	0	0	0	0	0	UniRef90_UPI00066475E1_hypothetical_protein_n=1_Tax=Rufibacter_sp._DG31D_RepID=UPI00066475E1
OG_10069	0	0	0	0	0.13	0.15	0	0	0	0	0	0
OG_1007	0.14	0.44	0	0.48	1.16	0	14.03	24.37	12.94	10	9.82	2.48	UniRef90_F4KXS3_Biotin/acetyl-CoA-carboxylase_ligase_n=1_Tax=Haliscomenobacter_hydrossis_(strain_ATCC_27775_/_DSM_1100_/_LMG_10767_/_O)_RepID=F4KXS3_HALH1
OG_10070	0	0	0	0	0	0	0	0	0	0	0	0	UniRef90_UPI0003605A75_hypothetical_protein_n=1_Tax=Eudoraea_adriatica_RepID=UPI0003605A75
OG_10071	0	0.15	0	0	0.39	0	0	0	0	0	0	0	UniRef90_G2DCZ6_Putative_hyalin_n=2_Tax=sulfur-oxidizing_symbionts_RepID=G2DCZ6_9GAMM
OG_10072	0	0	0	0	0	0	0	0	0	0	0	0	UniRef90_UPI000372B362_hypothetical_protein_n=1_Tax=Lewinella_cohaerens_RepID=UPI000372B362
OG_10073	0	0	0	0	0	0.15	0	0	0	0	0	0	UniRef90_F5LFH2_Uncharacterized_protein_n=2_Tax=Paenibacillus_RepID=F5LFH2_9BACL
OG_10074	0	0	0	0.32	0	0.15	0	0	0	0	0	0	UniRef90_A0A081SIP8_Uncharacterized_protein_n=1_Tax=Chlorobium_sp._GBChlB_RepID=A0A081SIP8_9CHLB
OG_10075	0.05	0	0.17	0.24	0	0	0	0	0	0	0	0	UniRef90_X8A476_Bacterial_regulatory_s,_tetR_family_protein_n=3_Tax=Mycobacterium_RepID=X8A476_MYCAV
OG_10076	0	0	0	0	0	0	0	0	0	0	0	0	UniRef90_A0A0A7KCG4_AraC_family_transcriptional_regulator_n=5_Tax=Flavobacteriaceae_RepID=A0A0A7KCG4_9FLAO
OG_10077	0.05	0	0.17	0	0.13	0.15	0	0	0	0	0	0	UniRef90_A0A0C1L4Q8_Metalloprotease_n=1_Tax=Flavihumibacter_sp._ZG627_RepID=A0A0C1L4Q8_9SPHI
OG_10078	0	0	0	0.08	0	0	0	0	0	0	0	0	UniRef90_A0A0D3LMH0_Uncharacterized_protein_n=1_Tax=Flammeovirgaceae_bacterium_311_RepID=A0A0D3LMH0_9BACT
OG_10079	0	0	0	0	0.39	0	0	0	0	0	0	0	UniRef90_A0A085EGV4_Uncharacterized_protein_n=1_Tax=Flavobacterium_sp._EM1308_RepID=A0A085EGV4_9FLAO
OG_1008	0.47	1.76	0.34	2.48	4.26	1.9	6.49	21.28	7.23	12.8	7.62	2.19	UniRef90_A0A098SAE4_UPF0061_protein_IX84_08040_n=1_Tax=Phaeodactylibacter_xiamenensis_RepID=A0A098SAE4_9SPHI
OG_10080	0	0.15	0	0	0	0	0	0	0	0	0	0	UniRef90_L0H3C0_DNA_helicase_n=1_Tax=Thioflavicoccus_mobilis_8321_RepID=L0H3C0_9GAMM
OG_10081	0	0	0	0	0	0	0	0	0	0	0	0	UniRef90_A0A023BR06_Uncharacterized_protein_n=1_Tax=Aquimarina_atlantica_RepID=A0A023BR06_9FLAO
OG_10082	0	0.15	0	0	0	0	0	0	0	0	0	0	UniRef90_A0A098S4G6_Uncharacterized_protein_n=1_Tax=Phaeodactylibacter_xiamenensis_RepID=A0A098S4G6_9SPHI
OG_10083	0	0	0	0	0	0	0	0	0	0	0	0	UniRef90_UPI00036C256E_hypothetical_protein_n=1_Tax=Flexithrix_dorotheae_RepID=UPI00036C256E
OG_10084	0.05	0	0	0	0	0	0	0	0	0	0	0	UniRef90_A0A0F2RRW4_Flagellar_basal_body_rod_protein_FlgB_n=3_Tax=Roseovarius_RepID=A0A0F2RRW4_9RHOB
OG_10085	0	0.15	0	0.08	0.26	0	0	0	0	0	0	0	UniRef90_UPI000381AFB7_hypothetical_protein_n=1_Tax=Spirosoma_panaciterrae_RepID=UPI000381AFB7
OG_10086	0	0	0	0.16	0.39	0.15	0	0	0	0	0	0	UniRef90_C2MDC9_Uncharacterized_protein_n=1_Tax=Porphyromonas_uenonis_60-3_RepID=C2MDC9_9PORP
OG_10087	0	0	0	0	0	0	0	0	0	0	0	0
OG_10088	0	0	0	0	0	0.15	0	0	0	0	0	0	UniRef90_UPI00042388CF_hypothetical_protein_n=1_Tax=Flavobacterium_sp._URHB0058_RepID=UPI00042388CF
OG_10089	0.05	0	0	0	0.13	0	0	0	0	0	0	0	UniRef90_A0A0E3ZYZ1_Uncharacterized_protein_n=1_Tax=Spirosoma_radiotolerans_RepID=A0A0E3ZYZ1_9BACT
OG_1009	0.52	0.29	1.01	0.56	0.52	0.58	0	0	0	0	0	0	UniRef90_F4KW21_Cell_wall_hydrolase/autolysin_n=1_Tax=Haliscomenobacter_hydrossis_(strain_ATCC_27775_/_DSM_1100_/_LMG_10767_/_O)_RepID=F4KW21_HALH1
OG_10090	0	0	0	0	0	0	0	0	0	0	0	0
OG_10091	0	0	0	0	0.13	0	0	0	0	0	0	0	UniRef90_UPI000368480F_hypothetical_protein_n=1_Tax=Paenibacillus_terrigena_RepID=UPI000368480F
OG_10092	0	0	0	0.16	0	0	0	0	0	0	0	0	UniRef90_A0A0C1V0V4_Uncharacterized_protein_n=1_Tax=Lyngbya_confervoides_BDU141951_RepID=A0A0C1V0V4_9CYAN
OG_10093	0	0.15	0	0.08	0	0	0	0	0	0	0	0	UniRef90_UPI00036F0274_hypothetical_protein_n=1_Tax=Thiothrix_disciformis_RepID=UPI00036F0274
OG_10094	0.09	0	0	0	0	0	0	0	0	0	0	0	UniRef90_A0A098S085_Uncharacterized_protein_n=1_Tax=Phaeodactylibacter_xiamenensis_RepID=A0A098S085_9SPHI
OG_10095	0	0	0	0	0	0	0	0	0	0	0	0	UniRef90_UPI0005C5E963_T9SS_C-terminal_target_domain-containing_protein_n=1_Tax=Lewinella_cohaerens_RepID=UPI0005C5E963
OG_10096	0	0	0	0	0	0	0	0	0	0	0	0	UniRef90_V6RX36_Uncharacterized_protein_n=1_Tax=Flavobacterium_cauense_R2A-7_RepID=V6RX36_9FLAO
OG_10097	0	0	0	0	0	0.15	0	0	0	0	0	0	UniRef90_UPI0005554C0E_hypothetical_protein_n=1_Tax=Haliea_salexigens_RepID=UPI0005554C0E
OG_10098	0	0	0.67	0.24	0	0	0	0	0	0	0	0	UniRef90_A0A0H4PCK7_Xylose_isomerase_domain-containing_protein_TIM_barrel_n=1_Tax=Cyclobacterium_amurskyense_RepID=A0A0H4PCK7_9BACT
OG_10099	0	0	0	0	0.13	0	0	0	0	0	0	0	UniRef90_UPI0003735214_hypothetical_protein_n=1_Tax=Flexithrix_dorotheae_RepID=UPI0003735214
OG_101	5.97	3.23	4.71	3.92	4.65	2.19	362.97	381.49	242.86	223.83	199.37	45.34	UniRef90_Q113V0_8-amino-7-oxononanoate_synthase_n=2_Tax=Trichodesmium_erythraeum_RepID=Q113V0_TRIEI
OG_1010	1.04	16	5.38	9.76	15.76	7.87	802.99	241.46	605.54	438.95	319.66	131.36	UniRef90_F4KVX8_10_kDa_chaperonin_n=2_Tax=Saprospiraceae_RepID=F4KVX8_HALH1
OG_10100	0	0	0	0	0	0	0	0	0	0	0	0	UniRef90_K0J1M0_Aminoglycoside_adenylyltransferase_n=1_Tax=Amphibacillus_xylanus_(strain_ATCC_51415_/_DSM_6626_/_JCM_7361_/_LMG_17667_/_NBRC_15112_/_Ep01)_RepID=K0J1M0_AMPXN
OG_10101	0	0	0	0	0	0	0	0	0	0	0	0	UniRef90_UPI000375F33A_hypothetical_protein_n=1_Tax=Lewinella_cohaerens_RepID=UPI000375F33A
OG_10102	0	0	0	0.08	0	0	0	0	0	0	0	0	UniRef90_UPI00017463DB_GHMP_kinase_n=3_Tax=Verrucomicrobium_RepID=UPI00017463DB
OG_10103	0	0	0	0	0	0	0	0	0	0	0	0	UniRef90_R1F9H8_Uncharacterized_protein_n=1_Tax=Emiliania_huxleyi_CCMP1516_RepID=R1F9H8_EMIHU
OG_10104	0	0	0	0.08	0	0	0	0	0	0	0	0
OG_10105	0	0.15	0	0	0	0.29	0	0	0	0	0	0	UniRef90_UPI0003682878_hypothetical_protein_n=1_Tax=Henriciella_marina_RepID=UPI0003682878
OG_10106	0	0	0	0	0.13	0	0	0	0	0	0	0	UniRef90_A1ZHQ0_Hydrolase,_alpha/beta_fold_family,_putative_n=1_Tax=Microscilla_marina_ATCC_23134_RepID=A1ZHQ0_9BACT
OG_10107	0	0	0	0	0	0	0	0	0	0	0	0
OG_10108	0	0	0	0.08	0	0.15	0	0	0	0	0	0	UniRef90_A8UMI2_Uncharacterized_protein_n=1_Tax=Flavobacteriales_bacterium_ALC-1_RepID=A8UMI2_9FLAO
OG_10109	0	0	0	0	0	0	0	0	0	0	0	0	UniRef90_A0A0E3UXB0_DNA_mismatch_repair_protein_MutT_n=1_Tax=Pontibacter_korlensis_RepID=A0A0E3UXB0_9BACT
OG_1011	1.18	1.61	0.5	0.64	0.52	0.15	3.93	0.73	0.34	0	0.26	0	UniRef90_A0A098S7D8_Uncharacterized_protein_n=1_Tax=Phaeodactylibacter_xiamenensis_RepID=A0A098S7D8_9SPHI
OG_10110	0	0	0	0	0	0	0	0	0	0	0	0	UniRef90_A0A0F4RKM5_MIP_family_channel_protein_n=1_Tax=Loktanella_sp._S4079_RepID=A0A0F4RKM5_9RHOB
OG_10111	0	0.15	0.17	0	0	0	0	0	0	0	0	0	UniRef90_A1ZC99_Transcriptional_regulator,_MarR_family,_putative_n=1_Tax=Microscilla_marina_ATCC_23134_RepID=A1ZC99_9BACT
OG_10112	0	0	0	0	0	0	0	0	0	0	0	0
OG_10113	0	0	0	0	0	0	0	0	0	0	0	0	UniRef90_UPI00047F68A5_hypothetical_protein_n=1_Tax=Crocinitomix_catalasitica_RepID=UPI00047F68A5
OG_10114	0.05	0	0	0.08	0	0	0	0	0	0	0	0	UniRef90_A1ZZP6_Uncharacterized_protein_n=1_Tax=Microscilla_marina_ATCC_23134_RepID=A1ZZP6_9BACT
OG_10115	0	0	0	0	0	0	0	0	0	0	0	0	UniRef90_UPI00041E9C94_hypothetical_protein_n=1_Tax=Algoriphagus_mannitolivorans_RepID=UPI00041E9C94
OG_10116	0	0.15	0	1.28	1.16	0.58	0	0	0	0	0	0	UniRef90_E6XFH8_6-phosphofructokinase_n=3_Tax=Cellulophaga_RepID=E6XFH8_CELAD
OG_10117	0	0	0	0	0	0	0	0	0	0	0	0	UniRef90_UPI000379A2C1_hypothetical_protein_n=1_Tax=Henriciella_marina_RepID=UPI000379A2C1
OG_10118	0	0	0	0	0	0	0	0	0	0	0	0	UniRef90_UPI0005C6B4DD_hypothetical_protein_n=1_Tax=Flammeovirga_sp._OC4_RepID=UPI0005C6B4DD
OG_10119	0	0	0	0	0	0	0	0	0	0	0	0	UniRef90_H6RGP8_Putative_uncharacterized_protein_n=1_Tax=uncultured_Flavobacteriia_bacterium_RepID=H6RGP8_9BACT
OG_1012	0.19	0.59	0.17	0.4	0.78	0.73	0	0	0	0	0	0	UniRef90_A0A098SAN5_Glucose-1-phosphate_thymidylyltransferase_n=2_Tax=Bacteria_RepID=A0A098SAN5_9SPHI
OG_10120	0	0	0	0	0	0	0	0	0	0	0	0	UniRef90_E5CCE6_Uncharacterized_protein_n=26_Tax=Bacteroides_RepID=E5CCE6_9BACE
OG_10121	0	0.29	0.17	0.08	0.13	0	0	0	0	0	0	0	UniRef90_A1ZSP6_Lipoprotein,_putative_n=2_Tax=Microscilla_marina_RepID=A1ZSP6_9BACT
OG_10122	0	0	0	0	0	0	0	0	0	0	0	0	UniRef90_UPI0002DC07A0_hypothetical_protein_n=1_Tax=Nodosilinea_nodulosa_RepID=UPI0002DC07A0
OG_10123	0	0	0	0	0	0	0	0	0	0	0	0	UniRef90_I4ANC0_Transcriptional_regulator,_AraC_family_n=1_Tax=Flexibacter_litoralis_(strain_ATCC_23117_/_DSM_6794_/_NBRC_15988_/_NCIMB_1366_/_Sio-4)_RepID=I4ANC0_FLELS
OG_10124	0.05	0	0	0	0.13	0	0	0	0	0	0	0	UniRef90_A1ZZF3_Uncharacterized_protein_n=1_Tax=Microscilla_marina_ATCC_23134_RepID=A1ZZF3_9BACT
OG_10125	0	0	0	0	0	0.15	0	0	0	0	0	0	UniRef90_UPI00036F1ECC_hypothetical_protein_n=1_Tax=Flexithrix_dorotheae_RepID=UPI00036F1ECC
OG_10126	0	0	0	0.08	0.13	0.15	0	0	0	0	0	0	UniRef90_UPI0006942351_hypothetical_protein_n=1_Tax=Psychroserpens_mesophilus_RepID=UPI0006942351
OG_10127	0	0	0	0.16	0	0	0	0	0	0	0	0	UniRef90_UPI000558F736_hypothetical_protein_n=1_Tax=Aquimarina_latercula_RepID=UPI000558F736
OG_10128	0	0	0	0	0	0	0	0	0	0	0	0	UniRef90_UPI00048B48A7_T9SS_C-terminal_target_domain-containing_protein_n=1_Tax=Tenacibaculum_sp._47A_GOM-205m_RepID=UPI00048B48A7
OG_10129	0	0	0	0	0	0	0	0	0	0	0	0	UniRef90_A0A0B8YKT1_Poly-beta-1,6-N-acetyl-D-glucosamine_N-deacetylase_PgaB_n=2_Tax=Pedobacter_glucosidilyticus_RepID=A0A0B8YKT1_9SPHI
OG_1013	0.14	0.44	0.5	0.88	0.65	0.73	0	0	0	0	0	0	UniRef90_F4L197_Acetate_CoA-transferase_YdiF_n=2_Tax=Haliscomenobacter_RepID=F4L197_HALH1
OG_10130	0	0	0	0	0	0	0	0	0	0	0	0	UniRef90_UPI0003800F2D_hypothetical_protein_n=1_Tax=Flexithrix_dorotheae_RepID=UPI0003800F2D
OG_10131	0.05	0.15	0.17	0.24	0	0	0	0	0	0	0	0	UniRef90_UPI0006715DAF_ABC_transporter_substrate-binding_protein_n=1_Tax=Desulfocarbo_indianensis_RepID=UPI0006715DAF
OG_10132	0	0	0	0	0.13	0.15	0	0	0	0	0	0	UniRef90_B8FAQ0_FAD-dependent_pyridine_nucleotide-disulphide_oxidoreductase_n=2_Tax=Desulfatibacillum_RepID=B8FAQ0_DESAA
OG_10133	0	0	0.34	0	0	0	0	0	0	0	0	0	UniRef90_A1ZY64_Serine/threonine_protein_kinases_n=1_Tax=Microscilla_marina_ATCC_23134_RepID=A1ZY64_9BACT
OG_10134	0	0	0	0	0	0	0	0	0	0	0	0	UniRef90_A0A0C1WRY2_Uncharacterized_protein_n=1_Tax=Scytonema_millei_VB511283_RepID=A0A0C1WRY2_9CYAN
OG_10135	0	0.15	0	0	0	0	0	0	0	0	0	0	UniRef90_F4L600_Uncharacterized_protein_n=1_Tax=Haliscomenobacter_hydrossis_(strain_ATCC_27775_/_DSM_1100_/_LMG_10767_/_O)_RepID=F4L600_HALH1
OG_10136	0	0	0	0	0	0	0	0	0	0	0	0	UniRef90_UPI00056B1FFA_hypothetical_protein_n=1_Tax=Crocinitomix_catalasitica_RepID=UPI00056B1FFA
OG_10137	0	0	0	0.08	0	0	0	0	0	0	0	0	UniRef90_A1ZYZ0_Probable_transcriptional_regulator,_putative_n=1_Tax=Microscilla_marina_ATCC_23134_RepID=A1ZYZ0_9BACT
OG_10138	0	0.29	0	0.08	0.39	0	0	0	0	0	0	0	UniRef90_UPI000479EDD3_hypothetical_protein_n=1_Tax=Maribacter_antarcticus_RepID=UPI000479EDD3
OG_10139	0.09	0	0	0.8	0.13	0	0	0	0	0	0	0	UniRef90_D3F075_30S_ribosomal_protein_S2_n=1_Tax=Conexibacter_woesei_(strain_DSM_14684_/_JCM_11494_/_NBRC_100937_/_ID131577)_RepID=D3F075_CONWI
OG_1014	0.9	5.58	4.37	3.92	6.2	2.33	0	0	0	0	0	0	UniRef90_UPI0005C73DE4_50S_ribosomal_protein_L22_n=1_Tax=Phaeodactylibacter_xiamenensis_RepID=UPI0005C73DE4
OG_10140	0	0	0	0.24	0.13	0	0	0	0	0	0	0	UniRef90_A0A0F7E563_Uncharacterized_protein_n=1_Tax=Myxococcus_fulvus_124B02_RepID=A0A0F7E563_MYXFU
OG_10141	0	0	0	0.24	0.52	0	0	0	0	0	0	0	UniRef90_UPI000371392E_T9SS_C-terminal_target_domain-containing_protein_n=1_Tax=Lewinella_cohaerens_RepID=UPI000371392E
OG_10142	0	0	0	0	0	0	0	0	0	0	0	0
OG_10143	0	0	0	0	0	0	0	0	0	0	0	0
OG_10144	0	0	0.17	0	0	0.15	0	0	0	0	0	0	UniRef90_UPI00055A646D_hypothetical_protein_n=1_Tax=Pontibacter_actiniarum_RepID=UPI00055A646D
OG_10145	0	0	0	0.08	0	0	0	0	0	0	0	0	UniRef90_A6DFU3_Uncharacterized_protein_n=1_Tax=Lentisphaera_araneosa_HTCC2155_RepID=A6DFU3_9BACT
OG_10146	0	0	0	0	0	0	0	0	0	0	0	0	UniRef90_A0A0F4RQK9_Uncharacterized_protein_n=2_Tax=Ruegeria_mobilis_RepID=A0A0F4RQK9_9RHOB
OG_10147	0	0	0	0.24	0	0	0	0	0	0	0	0
OG_10148	0	0	0	0.16	0	0	0	0	0	0	0	0
OG_10149	0	0	0	0.08	0	0	0	0	0	0	0	0	UniRef90_UPI00037714F3_hypothetical_protein_n=1_Tax=Hymenobacter_aerophilus_RepID=UPI00037714F3
OG_1015	1.09	0.29	1.01	0.32	0.39	0	0	0	0	0	0	0	UniRef90_F4L2J0_Probable_GTP-binding_protein_EngB_n=1_Tax=Haliscomenobacter_hydrossis_(strain_ATCC_27775_/_DSM_1100_/_LMG_10767_/_O)_RepID=F4L2J0_HALH1
OG_10150	0.05	0.29	0	0.4	0	0	0	0	0	0	0	0	UniRef90_R5DGZ2_Uncharacterized_protein_n=3_Tax=Parabacteroides_RepID=R5DGZ2_9PORP
OG_10151	0	0	0	0.24	0.13	0	0	0	0	0	0	0	UniRef90_UPI00046D17E1_hypothetical_protein_n=1_Tax=Deferrisoma_camini_RepID=UPI00046D17E1
OG_10152	0	0	0	0	0	0	0	0	0	0	0	0	UniRef90_A0A0D8I2T6_Uncharacterized_protein_n=3_Tax=Rhodococcus_RepID=A0A0D8I2T6_9NOCA
OG_10153	0	0	0	0.4	0	0	0	0	0	0	0	0	UniRef90_A0A076NV95_ATP-NAD_kinase_n=2_Tax=Flavobacterium_psychrophilum_RepID=A0A076NV95_FLAPS
OG_10154	0	0	0	0	0	0	0	0	0	0	0	0	UniRef90_UPI0004016F2C_hypothetical_protein_n=1_Tax=Paenibacillus_harenae_RepID=UPI0004016F2C
OG_10155	0	0	0	0.08	0	0	0	0	0	0	0	0	UniRef90_A4ATJ9_Uncharacterized_protein_n=1_Tax=Maribacter_sp._(strain_HTCC2170_/_KCCM_42371)_RepID=A4ATJ9_MARSH
OG_10156	0	0	0	0	0	0	0	0	0	0	0	0	UniRef90_A0A0C6FAA0_Trans-aconitate_2-methyltransferase_n=2_Tax=Methylobacterium_RepID=A0A0C6FAA0_9RHIZ
OG_10157	0	0.73	0	0	0	0	0	0	0	0	0	0	UniRef90_B1PJ37_Pol_protein_(Fragment)_n=1_Tax=Thalassiosira_pseudonana_RepID=B1PJ37_THAPS
OG_10158	0.05	0	0	0	0.26	0	0	0	0	0	0	0	UniRef90_G0J7W8_Esterase_n=1_Tax=Cyclobacterium_marinum_(strain_ATCC_25205_/_DSM_745)_RepID=G0J7W8_CYCMS
OG_10159	0	0	0	0.08	0.13	0.15	0	0	0	0	0	0	UniRef90_I4AH33_Deacetylase,_histone_deacetylase/acetoin_utilization_protein_n=1_Tax=Flexibacter_litoralis_(strain_ATCC_23117_/_DSM_6794_/_NBRC_15988_/_NCIMB_1366_/_Sio-4)_RepID=I4AH33_FLELS
OG_1016	0.66	0.59	0.17	0.08	0.26	0	0	0	0	0	0	0	UniRef90_A0A098S0M7_Maf-like_protein_IX84_27790_n=2_Tax=Bacteria_RepID=A0A098S0M7_9SPHI
OG_10160	0	0	0	0	0.26	0	0	0	0	0	0	0	UniRef90_C6W102_Dihydrofolate_reductase_n=2_Tax=Dyadobacter_RepID=C6W102_DYAFD
OG_10161	0	0	0	0	0	0	0	0	0	0	0	0	UniRef90_UPI0005C46511_hypothetical_protein_n=1_Tax=Flammeovirga_sp._OC4_RepID=UPI0005C46511
OG_10162	0	0.15	0.17	0.16	0	0.15	0	0	0	0	0	0	UniRef90_A0A0A1YIG4_Membrane_protein_n=1_Tax=Pseudomonas_taeanensis_MS-3_RepID=A0A0A1YIG4_9PSED
OG_10163	0	0	0	0.08	0	0	0	0	0	0	0	0	UniRef90_F4L888_Uncharacterized_protein_n=1_Tax=Haliscomenobacter_hydrossis_(strain_ATCC_27775_/_DSM_1100_/_LMG_10767_/_O)_RepID=F4L888_HALH1
OG_10164	0	0	0	0.08	0.13	0.15	0	0	0	0	0	0	UniRef90_UPI00048823AC_hypothetical_protein_n=1_Tax=Crocinitomix_catalasitica_RepID=UPI00048823AC
OG_10165	0	0	0	0	0	0.15	0	0	0	0	0	0
OG_10166	1.04	0	0	0.08	0	0.29	0	0	0	0	0	0	UniRef90_H8KTK5_Ferritin_n=1_Tax=Solitalea_canadensis_(strain_ATCC_29591_/_DSM_3403_/_NBRC_15130_/_NCIMB_12057_/_USAM_9D)_RepID=H8KTK5_SOLCM
OG_10167	0	0	0	0	0	0	0	0	0	0	0	0	UniRef90_UPI000698B7EA_hypothetical_protein_n=1_Tax=Aureispira_sp._CCB-QB1_RepID=UPI000698B7EA
OG_10168	0	0	0	0	0.26	0	0	0	0	0	0	0
OG_10169	0	0	0	0	0	0	0	0	0	0	0	0
OG_1017	0.43	2.05	1.51	2.4	2.58	1.9	0	0	0	0	0	0	UniRef90_A0A098RYH3_Peptidylprolyl_isomerase_n=1_Tax=Phaeodactylibacter_xiamenensis_RepID=A0A098RYH3_9SPHI
OG_10170	0	0	0	0.08	0.13	0	0	0	0	0	0	0
OG_10171	0	0	0	0	0.13	0.15	0	0	0	0	0	0	UniRef90_A0A0C2VGV5_Uncharacterized_protein_n=1_Tax=Jeotgalibacillus_campisalis_RepID=A0A0C2VGV5_9BACL
OG_10172	0	0	0	0	0	0	0	0	0	0	0	0	UniRef90_L8JSM2_Glyoxalase/bleomycin_resistance_protein/dioxygenase_n=1_Tax=Fulvivirga_imtechensis_AK7_RepID=L8JSM2_9BACT
OG_10173	0	0	0.5	0	0	0	0	0	0	0	0	0	UniRef90_A0A0F7DYP4_DoxX_family_protein_n=1_Tax=Myxococcus_fulvus_124B02_RepID=A0A0F7DYP4_MYXFU
OG_10174	0.05	0	0	0	0.26	0	0	0	0	0	0	0	UniRef90_A0A0C1TI94_Uncharacterized_protein_(Fragment)_n=2_Tax=Oscillatoriophycideae_RepID=A0A0C1TI94_9CHRO
OG_10175	23.41	11.74	74.68	9.36	2.28	3.56	0	0	0	0	0	0	UniRef90_UPI000509C4DC_hypothetical_protein_n=2_Tax=Clostridium_RepID=UPI000509C4DC
OG_10176	0	0	0	0.08	0	0.15	0	0	0	0	0	0	UniRef90_U7PBG9_Uncharacterized_protein_n=1_Tax=Halomonas_sp._PBN3_RepID=U7PBG9_9GAMM
OG_10177	0.09	0	0	0	0	0	0	0	0	0	0	0	UniRef90_A0A098S4Z9_Membrane_protein_n=1_Tax=Phaeodactylibacter_xiamenensis_RepID=A0A098S4Z9_9SPHI
OG_10178	0	0	0	0	0	0	0	0	0	0	0	0	UniRef90_A0A0D7VXM7_Uncharacterized_protein_n=1_Tax=Tamlana_sedimentorum_RepID=A0A0D7VXM7_9FLAO
OG_10179	0	0	0	0.24	0.39	0	0	0	0	0	0	0	UniRef90_M7MY68_Uncharacterized_protein_n=2_Tax=Cesiribacter_RepID=M7MY68_9BACT
OG_1018	0.62	1.61	1.85	2.64	1.16	0.73	0	0	0	0	0	0	UniRef90_A0A098SAJ4_DNA_topoisomerase_IV_subunit_B_n=3_Tax=Bacteria_RepID=A0A098SAJ4_9SPHI
OG_10180	0	0	0	0	0	0	0	0	0	0	0	0	UniRef90_A9DP58_Polysaccharide_deacetylase_n=2_Tax=Kordia_RepID=A9DP58_9FLAO
OG_10181	0	0	0	0.24	0	0	0	0	0	0	0	0	UniRef90_A0A0B4CP97_Dithiol-disulfide_isomerase_n=2_Tax=Chryseobacterium_RepID=A0A0B4CP97_9FLAO
OG_10182	0	0	0	0	0	0	0	0	0	0	0	0	UniRef90_A0A011UST7_Gene_transfer_agent_(GTA)_n=2_Tax=Proteobacteria_RepID=A0A011UST7_9RHIZ
OG_10183	0	0	0	0	0	0	0	0	0	0	0	0	UniRef90_E4TUY4_Uncharacterized_protein_n=1_Tax=Marivirga_tractuosa_(strain_ATCC_23168_/_DSM_4126_/_NBRC_15989_/_NCIMB_1408_/_VKM_B-1430_/_H-43)_RepID=E4TUY4_MARTH
OG_10184	0	0	0	0.08	0.13	0	0	0	0	0	0	0	UniRef90_A0A0C1JC06_Threonine--tRNA_ligase_n=1_Tax=Ruegeria_sp._ANG-S4_RepID=A0A0C1JC06_9RHOB
OG_10185	0.05	0	0.17	0	0	0	0	0	0	0	0	0	UniRef90_A8TU93_Lycopene_beta_and_epsilon_cyclase_n=1_Tax=alpha_proteobacterium_BAL199_RepID=A8TU93_9PROT
OG_10186	0	0	0	0.08	0	0	0	0	0	0	0	0	UniRef90_G8UPL7_Uncharacterized_protein_n=4_Tax=Tannerella_forsythia_RepID=G8UPL7_TANFA
OG_10187	0	0	0	0	0	0	0	0	0	0	0	0	UniRef90_A1SFS8_Uncharacterized_protein_n=2_Tax=Nocardioides_sp._(strain_BAA-499_/_JS614)_RepID=A1SFS8_NOCSJ
OG_10188	0	0	0	0	0.13	0	0	0	0	0	0	0	UniRef90_A4A3Q6_Putative_hydrolase_or_acyltransferase_(Alpha/beta_hydrolase_superfamily)_n=1_Tax=Congregibacter_litoralis_KT71_RepID=A4A3Q6_9GAMM
OG_10189	0	0	0.17	0	0	0	0	0	0	0	0	0	UniRef90_UPI00069441DF_short-chain_dehydrogenase_n=1_Tax=Flammeovirga_sp._OC4_RepID=UPI00069441DF
OG_1019	1.23	0	0.5	0.08	0	0.15	0	0	0	0	0	0	UniRef90_A0A098SCZ3_Ribose_5-phosphate_isomerase_n=1_Tax=Phaeodactylibacter_xiamenensis_RepID=A0A098SCZ3_9SPHI
OG_10190	0	0	0	0	0	0	0	0	0	0	0	0	UniRef90_UPI00029B4582_EmrB/QacA_subfamily_drug_resistance_transporter_n=1_Tax=Dietzia_alimentaria_RepID=UPI00029B4582
OG_10191	0	0	0.17	0	0	0.15	0	0	0	0	0	0	UniRef90_A1ZKH2_Serine/threonine_protein_kinases_n=1_Tax=Microscilla_marina_ATCC_23134_RepID=A1ZKH2_9BACT
OG_10192	0	0	0	0	0	0	0	0	0	0	0	0	UniRef90_Q7UJX7_Probable_marR-family_transcription_regulator_n=5_Tax=Rhodopirellula_RepID=Q7UJX7_RHOBA
OG_10193	0	0	0	0.08	0	0	0	0	0	0	0	0	UniRef90_A1ZJI5_HTH-type_transcriptional_regulator_xre_n=1_Tax=Microscilla_marina_ATCC_23134_RepID=A1ZJI5_9BACT
OG_10194	0	0	0.17	0	0.13	0	0	0	0	0	0	0	UniRef90_A1ZTG0_Uncharacterized_protein_n=1_Tax=Microscilla_marina_ATCC_23134_RepID=A1ZTG0_9BACT
OG_10195	0.05	0	0.17	0.08	0.13	0	0	0	0	0	0	0	UniRef90_A1ZFA0_Uncharacterized_protein_n=1_Tax=Microscilla_marina_ATCC_23134_RepID=A1ZFA0_9BACT
OG_10196	0	0	0	0.16	0	0	0	0	0	0	0	0	UniRef90_A1ZDZ5_Uncharacterized_protein_n=1_Tax=Microscilla_marina_ATCC_23134_RepID=A1ZDZ5_9BACT
OG_10197	0.05	0	0	0.08	0.13	0	0	0	0	0	0	0	UniRef90_A0A0F9LA88_Uncharacterized_protein_(Fragment)_n=1_Tax=marine_sediment_metagenome_RepID=A0A0F9LA88_9ZZZZ
OG_10198	0	0	0	0	0	0	0	0	0	0	0	0
OG_10199	0	0.29	0.84	0.16	0.39	0.29	0	0	0	0	0	0
OG_102	58.91	50.56	65.66	8.87	15.55	9.18	5376.84	1636.64	1554.53	1146.37	875.84	351.97	UniRef90_Q10XN5_Uncharacterized_protein_n=1_Tax=Trichodesmium_erythraeum_(strain_IMS101)_RepID=Q10XN5_TRIEI
OG_1020	0.76	0.73	1.18	3.28	1.81	1.6	0	0	0	0	0	0	UniRef90_A0A098S013_Uncharacterized_protein_n=2_Tax=Bacteria_RepID=A0A098S013_9SPHI
OG_10200	0	0	0	0	0	0	0	0	0	0	0	0	UniRef90_UPI00029A3944_N-acetyltransferase_GCN5_n=1_Tax=Gillisia_marina_RepID=UPI00029A3944
OG_10201	0.09	1.32	2.02	0	0.26	0.29	0	0	0	0	0	0
OG_10202	0	0.15	0	0	0	0	0	0	0	0	0	0	UniRef90_A0A061NVM7_Uncharacterized_protein_n=1_Tax=Geomicrobium_sp._JCM_19038_RepID=A0A061NVM7_9BACL
OG_10203	0	0.29	0.84	0	0	0.15	0	0	0	0	0	0	UniRef90_L8JVZ6_Uncharacterized_protein_n=1_Tax=Fulvivirga_imtechensis_AK7_RepID=L8JVZ6_9BACT
OG_10204	0	0	0.17	0	0	0	0	0	0	0	0	0	UniRef90_A1ZUF4_Uncharacterized_protein_n=1_Tax=Microscilla_marina_ATCC_23134_RepID=A1ZUF4_9BACT
OG_10205	0	0	0.17	0	0	0	0	0	0	0	0	0	UniRef90_A0A023BTW6_Uncharacterized_protein_n=1_Tax=Aquimarina_atlantica_RepID=A0A023BTW6_9FLAO
OG_10206	0	0.29	0	0	0.26	0	0	0	0	0	0	0	UniRef90_UPI00037B38DE_hypothetical_protein_n=1_Tax=Flexithrix_dorotheae_RepID=UPI00037B38DE
OG_10207	0.09	0	0.84	0	0	0.15	0	0	0	0	0	0	UniRef90_A1ZX38_Uncharacterized_protein_n=1_Tax=Microscilla_marina_ATCC_23134_RepID=A1ZX38_9BACT
OG_10208	0.05	0	0	0	0	0	0	0	0	0	0	0	UniRef90_D2VD95_Predicted_protein_n=1_Tax=Naegleria_gruberi_RepID=D2VD95_NAEGR
OG_10209	0	0	0	0	0.26	0	0	0	0	0	0	0
OG_1021	0.9	3.23	2.18	3.92	2.2	1.6	0	0	0	0	0	0	UniRef90_A0A098S6L1_Ribonuclease_Y_n=1_Tax=Phaeodactylibacter_xiamenensis_RepID=A0A098S6L1_9SPHI
OG_10210	0	0.29	0	0	0	0	0	0	0	0	0	0	UniRef90_A1ZHR3_Uncharacterized_protein_n=2_Tax=Microscilla_marina_RepID=A1ZHR3_9BACT
OG_10211	0	0	0	0	0	0	0	0	0	0	0	0	UniRef90_UPI000697E3F4_hypothetical_protein_n=1_Tax=Aureispira_sp._CCB-QB1_RepID=UPI000697E3F4
OG_10212	0	0	0	0	0	0	0	0	0	0	0	0	UniRef90_A9E6J2_Uncharacterized_protein_n=1_Tax=Kordia_algicida_OT-1_RepID=A9E6J2_9FLAO
OG_10213	0	0	0	0	0	0	0	0	0	0	0	0	UniRef90_X0X547_Marine_sediment_metagenome_DNA,_contig:_S01H1_S29261_n=1_Tax=marine_sediment_metagenome_RepID=X0X547_9ZZZZ
OG_10214	0.28	0	0	0	0	0	0	0	0	0	0	0	UniRef90_UPI00069D13EF_hypothetical_protein_n=1_Tax=Roseivirga_sp._D-25_RepID=UPI00069D13EF
OG_10215	0	0	0.34	0	0	0	0	0	0	0	0	0	UniRef90_UPI00061940CC_hypothetical_protein_n=1_Tax=Hymenobacter_sp._MIMtkLc17_RepID=UPI00061940CC
OG_10216	0.05	0.29	1.34	0.08	0.52	0.15	0	0	0	0	0	0	UniRef90_A1ZX07_Uncharacterized_protein_n=2_Tax=Microscilla_marina_RepID=A1ZX07_9BACT
OG_10217	0	0.15	0	0	0	0	0	0	0	0	0	0	UniRef90_A1ZJH5_Uncharacterized_protein_n=1_Tax=Microscilla_marina_ATCC_23134_RepID=A1ZJH5_9BACT
OG_10218	0	0.59	0.5	0.24	1.29	1.17	0	0	0	0	0	0	UniRef90_A1ZJT7_Lipoprotein,_putative_n=1_Tax=Microscilla_marina_ATCC_23134_RepID=A1ZJT7_9BACT
OG_10219	0	0	0	0	0.65	0.29	0	0	0	0	0	0	UniRef90_A4TYE5_Putative_uncharacterized_protein_n=1_Tax=Magnetospirillum_gryphiswaldense_RepID=A4TYE5_9PROT
OG_1022	2.51	3.67	2.52	6.4	5.81	4.81	0	0	0	0	0	0	UniRef90_L8JR55_Oar_protein_n=1_Tax=Fulvivirga_imtechensis_AK7_RepID=L8JR55_9BACT
OG_10220	0	0	0.17	0	0	0	0	0	0	0	0	0	UniRef90_A1ZR50_PKD_domain_protein_n=2_Tax=Microscilla_marina_RepID=A1ZR50_9BACT
OG_10221	0	0	0	0.24	0	0.15	0	0	0	0	0	0	UniRef90_A1ZH34_Lipoprotein,_putative_n=1_Tax=Microscilla_marina_ATCC_23134_RepID=A1ZH34_9BACT
OG_10222	0	0	0	0	0	0	0	0	0	0	0	0	UniRef90_A0A0H4VV13_Esterase_n=2_Tax=Rufibacter_sp._DG31D_RepID=A0A0H4VV13_9BACT
OG_10223	0	0	0	0	0	0	0	0	0	0	0	0	UniRef90_K4IBC3_Uncharacterized_protein_n=1_Tax=Psychroflexus_torquis_(strain_ATCC_700755_/_ACAM_623)_RepID=K4IBC3_PSYTT
OG_10224	0	0	0	0.08	0	0	0	0	0	0	0	0	UniRef90_A4ARU6_Conserved_hypothetical_membrane-spanning_protein_n=1_Tax=Maribacter_sp._(strain_HTCC2170_/_KCCM_42371)_RepID=A4ARU6_MARSH
OG_10225	0	0.29	0.17	0.08	0	0	0	0	0	0	0	0	UniRef90_A1ZYM7_Uncharacterized_protein_n=1_Tax=Microscilla_marina_ATCC_23134_RepID=A1ZYM7_9BACT
OG_10226	0	0	0	0	0	0	0	0	0	0	0	0
OG_10227	0	0	0.17	0	0.39	0	0	0	0	0	0	0	UniRef90_UPI00041E8885_hypothetical_protein_n=1_Tax=Aquimarina_latercula_RepID=UPI00041E8885
OG_10228	0	0	0	0	0	0	0	0	0	0	0	0	UniRef90_A1ZG27_Uncharacterized_protein_n=1_Tax=Microscilla_marina_ATCC_23134_RepID=A1ZG27_9BACT
OG_10229	0	0	0	0	0	0	0	0	0	0	0	0
OG_1023	0	0	0.17	0	0.13	0	0	0	0	0	0	0	UniRef90_A4C095_Uncharacterized_protein_n=2_Tax=Polaribacter_RepID=A4C095_9FLAO
OG_10230	0	0	0.17	0	0	0.29	0	0	0	0	0	0	UniRef90_A1ZLM9_Tetratricopeptide_repeat_domain_protein_n=1_Tax=Microscilla_marina_ATCC_23134_RepID=A1ZLM9_9BACT
OG_10231	0	0	0	0	0	0	0	0	0	0	0	0	UniRef90_D0TA48_D12_class_N6_adenine-specific_DNA_methyltransferase_n=2_Tax=Bacteroides_sp._2_1_33B_RepID=D0TA48_9BACE
OG_10232	0	0	0	0.08	0.13	0	0	0	0	0	0	0	UniRef90_E7BB61_LPS_biosynthesis_protein_n=7_Tax=Legionella_pneumophila_RepID=E7BB61_LEGPN
OG_10233	0.19	0.15	0.17	0	0	0	0	0	0	0	0	0	UniRef90_Q1GCF7_OsmC-like_protein_n=4_Tax=Ruegeria_RepID=Q1GCF7_RUEST
OG_10234	0	0	0	0	0	0	0	0	0	0	0	0	UniRef90_A1ZR78_Uncharacterized_protein_n=2_Tax=Microscilla_marina_RepID=A1ZR78_9BACT
OG_10235	0	0	0	0.08	0	0.15	0	0	0	0	0	0	UniRef90_A9DQ66_Lantibiotic_biosynthesis_protein_n=2_Tax=Kordia_RepID=A9DQ66_9FLAO
OG_10236	0	0	0	0.08	0	0	0	0	0	0	0	0	UniRef90_D5BMC1_Uncharacterized_protein_n=1_Tax=Zunongwangia_profunda_(strain_DSM_18752_/_CCTCC_AB_206139_/_SM-A87)_RepID=D5BMC1_ZUNPS
OG_10237	0	0	0	0	0	0.15	0	0	0	0	0	0	UniRef90_A1ZV18_DdaH_family_protein_n=1_Tax=Microscilla_marina_ATCC_23134_RepID=A1ZV18_9BACT
OG_10238	0	0	0	0	0.13	0	0	0	0	0	0	0	UniRef90_UPI000640C890_succinylglutamate_desuccinylase_n=1_Tax=Maribacter_thermophilus_RepID=UPI000640C890
OG_10239	0	0	0	0.08	0.13	0	0	0	0	0	0	0	UniRef90_A1ZQ22_MoaA/nifB/pqqE_family_protein_n=1_Tax=Microscilla_marina_ATCC_23134_RepID=A1ZQ22_9BACT
OG_1024	0.9	1.91	0.84	0.8	0.78	0.29	0	0	0	0	0	0	UniRef90_UPI00038101A2_hypothetical_protein_n=1_Tax=Flexithrix_dorotheae_RepID=UPI00038101A2
OG_10240	0	0	0	0.08	0	0	0	0	0	0	0	0	UniRef90_UPI0003705834_hypothetical_protein_n=1_Tax=Lewinella_cohaerens_RepID=UPI0003705834
OG_10241	0	0	0	0	0	0	0	0	0	0	0	0	UniRef90_A0A0C1DIW5_DNA-binding_protein_n=2_Tax=Pedobacter_kyungheensis_RepID=A0A0C1DIW5_9SPHI
OG_10242	0	0	0.17	0	0	0	0	0	0	0	0	0	UniRef90_A0A098S529_Uncharacterized_protein_n=1_Tax=Phaeodactylibacter_xiamenensis_RepID=A0A098S529_9SPHI
OG_10243	0	0	0	0	0	0	0	0	0	0	0	0	UniRef90_A1ZXU9_Uncharacterized_protein_n=1_Tax=Microscilla_marina_ATCC_23134_RepID=A1ZXU9_9BACT
OG_10244	0	0	0.17	0	0	0	0	0	0	0	0	0	UniRef90_A0A0D3LAB9_Aldo/keto_reductase_family_protein_n=1_Tax=Flammeovirgaceae_bacterium_311_RepID=A0A0D3LAB9_9BACT
OG_10245	0	0	0	0	0	0	0	0	0	0	0	0	UniRef90_A0A0D3LFJ9_Dinb_family_protein_n=1_Tax=Flammeovirgaceae_bacterium_311_RepID=A0A0D3LFJ9_9BACT
OG_10246	0	0	0	0.08	0.26	0	0	0	0	0	0	0
OG_10247	0	0	0	0	0	0	0	0	0	0	0	0	UniRef90_UPI000687BDF3_hypothetical_protein_n=1_Tax=alpha_proteobacterium_Mf_1.05b.01_RepID=UPI000687BDF3
OG_10248	0	0	0	0	0	0.15	0	0	0	0	0	0	UniRef90_A1ZQ36_Uncharacterized_protein_n=1_Tax=Microscilla_marina_ATCC_23134_RepID=A1ZQ36_9BACT
OG_10249	0.05	0	0	0.08	0	0	0	0	0	0	0	0	UniRef90_A1ZHV1_Putative_dehydrogenase_n=2_Tax=Microscilla_marina_RepID=A1ZHV1_9BACT
OG_1025	0.14	2.05	0.17	0.48	1.42	0.29	0	0	0	0	0	0	UniRef90_F4KU80_Uncharacterized_protein_n=1_Tax=Haliscomenobacter_hydrossis_(strain_ATCC_27775_/_DSM_1100_/_LMG_10767_/_O)_RepID=F4KU80_HALH1
OG_10250	0	0	0	0	0	0	0	0	0	0	0	0	UniRef90_UPI000569AC4A_hypothetical_protein_n=1_Tax=Muricauda_sp._MAR_2010_75_RepID=UPI000569AC4A
OG_10251	0	0	0.17	0.24	0	0	0	0	0	0	0	0	UniRef90_UPI00069667A6_hypothetical_protein_n=1_Tax=Aureispira_sp._CCB-QB1_RepID=UPI00069667A6
OG_10252	0	0	0	0	0	0	0	0	0	0	0	0	UniRef90_M4QS55_Uncharacterized_protein_n=1_Tax=Synechococcus_phage_S-SKS1_RepID=M4QS55_9CAUD
OG_10253	0	0	0	0	0	0	0	0	0	0	0	0
OG_10254	0	0	0	0	0	0	0	0	0	0	0	0	UniRef90_A0A073J379_Mannose-6-phosphate_isomerase_n=2_Tax=Sulfitobacter_RepID=A0A073J379_9RHOB
OG_10255	0	0.15	0	0	0	0	0	0	0	0	0	0
OG_10256	0	0	0	0	0.13	0.15	0	0	0	0	0	0
OG_10257	0	0	0	0	0	0	0	0	0	0	0	0	UniRef90_A1ZRL8_Uncharacterized_protein_n=1_Tax=Microscilla_marina_ATCC_23134_RepID=A1ZRL8_9BACT
OG_10258	0	0	0	0	0	0	0	0	0	0	0	0	UniRef90_UPI00061937B9_hypothetical_protein_n=1_Tax=Hymenobacter_sp._MIMtkLc17_RepID=UPI00061937B9
OG_10259	0.05	0	0	0.08	0	0.15	0	0	0	0	0	0
OG_1026	0	0	0	0.48	0.26	0.29	0	0	0	0	0	0	UniRef90_UPI000365C50F_hypothetical_protein_n=1_Tax=Flexithrix_dorotheae_RepID=UPI000365C50F
OG_10260	0	0	0	0	0	0	0	0	0	0	0	0	UniRef90_A3XF90_DNA-binding_protein,_putative_n=3_Tax=Rhodobacteraceae_RepID=A3XF90_9RHOB
OG_10261	0	0	0	0.24	0.26	0.15	0	0	0	0	0	0	UniRef90_A1ZG20_Uncharacterized_protein_n=1_Tax=Microscilla_marina_ATCC_23134_RepID=A1ZG20_9BACT
OG_10262	0	0	0	0	0	0	0	0	0	0	0	0	UniRef90_A1ZFB7_Uncharacterized_protein_n=1_Tax=Microscilla_marina_ATCC_23134_RepID=A1ZFB7_9BACT
OG_10263	0	0	0.17	0	0	0	0	0	0	0	0	0	UniRef90_UPI00040D5465_hypothetical_protein_n=1_Tax=Budvicia_aquatica_RepID=UPI00040D5465
OG_10264	0	0	0	0	0.13	0	0	0	0	0	0	0	UniRef90_A0A0D3LHF7_DoxX_family_protein_n=1_Tax=Flammeovirgaceae_bacterium_311_RepID=A0A0D3LHF7_9BACT
OG_10265	0	0.44	0.34	0.08	0.26	0	0	0	0	0	0	0	UniRef90_A0A0J0YE59_Uncharacterized_protein_n=1_Tax=Flavobacterium_sp._ABG_RepID=A0A0J0YE59_9FLAO
OG_10266	0	0	0	0.08	0	0	0	0	0	0	0	0	UniRef90_R7F6E4_Uncharacterized_protein_n=1_Tax=Clostridium_sp._CAG:354_RepID=R7F6E4_9CLOT
OG_10267	0	0	0	0.16	0	0.15	0	0	0	0	0	0	UniRef90_UPI00069862A6_hypothetical_protein_n=1_Tax=Aureispira_sp._CCB-QB1_RepID=UPI00069862A6
OG_10268	0	0	0	0.08	0.26	0.29	0	0	0	0	0	0	UniRef90_A1ZQS2_Uncharacterized_protein_n=1_Tax=Microscilla_marina_ATCC_23134_RepID=A1ZQS2_9BACT
OG_10269	0	0	0.34	0.08	0	0	0	0	0	0	0	0	UniRef90_UPI0005527AD4_hypothetical_protein_n=1_Tax=Algoriphagus_terrigena_RepID=UPI0005527AD4
OG_1027	0.09	0	0	0.16	0.26	0	30.68	31.56	35.46	12.48	26.39	7.79	UniRef90_UPI00063EFC06_hypothetical_protein_n=1_Tax=Trichodesmium_erythraeum_RepID=UPI00063EFC06
OG_10270	0	0	0	0	0	0	0	0	0	0	0	0	UniRef90_UPI0004DFC8CA_tautomerase_n=2_Tax=Flavobacteriaceae_RepID=UPI0004DFC8CA
OG_10271	0	0	0	0	0.13	0	0	0	0	0	0	0	UniRef90_E8R516_Prenyltransferase/squalene_oxidase_n=1_Tax=Isosphaera_pallida_(strain_ATCC_43644_/_DSM_9630_/_IS1B)_RepID=E8R516_ISOPI
OG_10272	0.09	0.15	0.17	1.04	0.65	0.44	0	0	0	0	0	0	UniRef90_A0A098S6N0_Nitric_oxide_synthase_oxygenase_n=2_Tax=Bacteria_RepID=A0A098S6N0_9SPHI
OG_10273	0.05	0	0.5	0	0.26	0	0	0	0	0	0	0	UniRef90_A1ZHC7_Na+/H+_antiporter_n=1_Tax=Microscilla_marina_ATCC_23134_RepID=A1ZHC7_9BACT
OG_10274	0	0	0	0.16	0	0	0	0	0	0	0	0	UniRef90_A4A6Y1_Transcriptional_regulator,_LysR_family_n=1_Tax=Congregibacter_litoralis_KT71_RepID=A4A6Y1_9GAMM
OG_10275	0	0	0	0	0	0	0	0	0	0	0	0	UniRef90_A0A0D5YV87_Uncharacterized_protein_n=1_Tax=Muricauda_lutaonensis_RepID=A0A0D5YV87_9FLAO
OG_10276	0	0	0	0	0	0	0	0	0	0	0	0	UniRef90_A1ZPS3_Uncharacterized_protein_n=1_Tax=Microscilla_marina_ATCC_23134_RepID=A1ZPS3_9BACT
OG_10277	0	0	0	0	0.13	0	0	0	0	0	0	0	UniRef90_A0A0J7ISB0_Glyoxalase_n=2_Tax=Chryseobacterium_RepID=A0A0J7ISB0_9FLAO
OG_10278	0	0	0	0	0	0	0	0	0	0	0	0	UniRef90_A4EQ57_Transcriptional_regulator,_AsnC_family_protein_n=1_Tax=Roseobacter_sp._SK209-2-6_RepID=A4EQ57_9RHOB
OG_10279	0.05	0	0	0	0	0	0	0	0	0	0	0	UniRef90_A0A0C1ILZ4_Uncharacterized_protein_n=1_Tax=Flavihumibacter_solisilvae_RepID=A0A0C1ILZ4_9SPHI
OG_1028	0.19	0.88	0.34	0.56	0.65	0.15	70.41	40.95	53.78	21.91	38.63	9.48	UniRef90_Q116C9_Na+/solute_symporter_n=1_Tax=Trichodesmium_erythraeum_(strain_IMS101)_RepID=Q116C9_TRIEI
OG_10280	0.09	0	0	0.08	0	0	0	0	0	0	0	0	UniRef90_A0A0B4EB93_Beta-lactamase_n=1_Tax=Chryseobacterium_taiwanense_RepID=A0A0B4EB93_9FLAO
OG_10281	0.09	0.15	0	0.24	0.13	0.15	0	0	0	0	0	0	UniRef90_E1RFS4_Peptidase_C1A_papain_n=2_Tax=Methanolacinia_RepID=E1RFS4_METP4
OG_10282	0	0	0	0	0	0	0	0	0	0	0	0	UniRef90_M7Y948_Uncharacterized_protein_n=1_Tax=Mariniradius_saccharolyticus_AK6_RepID=M7Y948_9BACT
OG_10283	0.19	0	0.5	0.08	0.26	0	0	0	0	0	0	0	UniRef90_A0A098S7N5_Uncharacterized_protein_n=2_Tax=Bacteria_RepID=A0A098S7N5_9SPHI
OG_10284	0	0	0	0.16	0.13	0	0	0	0	0	0	0	UniRef90_UPI0003609E06_hypothetical_protein_n=1_Tax=Lewinella_cohaerens_RepID=UPI0003609E06
OG_10285	0	0	0	0	0	0	0	0	0	0	0	0	UniRef90_A0A0F9QYI7_Uncharacterized_protein_n=1_Tax=marine_sediment_metagenome_RepID=A0A0F9QYI7_9ZZZZ
OG_10286	0	0	0.17	0	0	0	0	0	0	0	0	0	UniRef90_A0A062U8A2_Nitronate_monooxygenase_n=3_Tax=Hyphomonas_RepID=A0A062U8A2_9RHOB
OG_10287	0.05	0	0.84	0	0	0	0	0	0	0	0	0	UniRef90_M5RCW3_Uncharacterized_protein_n=1_Tax=Rhodopirellula_maiorica_SM1_RepID=M5RCW3_9PLAN
OG_10288	0	0	0	0	0	0.15	0	0	0	0	0	0	UniRef90_A1ZHG9_Uncharacterized_protein_n=1_Tax=Microscilla_marina_ATCC_23134_RepID=A1ZHG9_9BACT
OG_10289	0.14	0	0.17	0.16	0	0.15	0	0	0	0	0	0	UniRef90_A1ZGH0_Uncharacterized_protein_n=1_Tax=Microscilla_marina_ATCC_23134_RepID=A1ZGH0_9BACT
OG_1029	0.57	1.32	0	1.68	2.45	1.17	5.54	5.14	4.37	6.48	5.94	0.87	UniRef90_F4KPE8_Sulphatase-modifying_factor_protein_n=1_Tax=Haliscomenobacter_hydrossis_(strain_ATCC_27775_/_DSM_1100_/_LMG_10767_/_O)_RepID=F4KPE8_HALH1
OG_10290	0	0	0	0	0	0	0	0	0	0	0	0	UniRef90_D2QJ91_Alkyl_hydroperoxide_reductase/_Thiol_specific_antioxidant/_Mal_allergen_n=1_Tax=Spirosoma_linguale_(strain_ATCC_33905_/_DSM_74_/_LMG_10896)_RepID=D2QJ91_SPILD
OG_10291	0	0	0	0	0.26	0	0	0	0	0	0	0	UniRef90_K9XDZ5_GCN5-related_N-acetyltransferase_n=1_Tax=Gloeocapsa_sp._PCC_7428_RepID=K9XDZ5_9CHRO
OG_10292							0.28	0	0	0	0	0
OG_10293							20.31	6.9	3.36	2.24	5.56	1.46
OG_10294							30.59	4.4	4.71	13.27	17.57	3.94	UniRef90_UPI00063F70B6_hypothetical_protein_n=1_Tax=Trichodesmium_erythraeum_RepID=UPI00063F70B6
OG_10295	0	0	0	0	0	0	0	0	0	0	0	0	UniRef90_I2GE43_Uncharacterized_protein_n=1_Tax=Fibrisoma_limi_BUZ_3_RepID=I2GE43_9BACT
OG_10296	0	0	0	0.24	0.13	0.29	0	0	0	0	0	0
OG_10297	0	0	0	0	0	0	0	0	0	0	0	0	UniRef90_A0A0B0EB25_Uncharacterized_protein_n=1_Tax=Candidatus_Scalindua_brodae_RepID=A0A0B0EB25_9BACT
OG_10298	0	0	0	0	0	0	0	0	0	0	0	0
OG_10299	0.05	0	0	0.48	0.13	0	0	0	0	0	0	0	UniRef90_A0A024FHS7_Alpha-mannosidase/_calcium_ion_binding_/_mannosyl-oligosaccharide_1,2-alpha-mannosidase_n=2_Tax=Winogradskyella_sp._PG-2_RepID=A0A024FHS7_9FLAO
OG_103	2.7	7.49	6.22	6.96	9.04	8.6	1422.69	818.18	871.09	1500.86	1215.72	370.75	UniRef90_A9DPY9_Uncharacterized_protein_n=2_Tax=Kordia_RepID=A9DPY9_9FLAO
OG_1030							261.28	194.34	200.17	126.35	144.46	50.59	UniRef90_Q10XK4_Uncharacterized_protein_n=2_Tax=Trichodesmium_erythraeum_RepID=Q10XK4_TRIEI
OG_10300	0	0	0	0.08	0	0	0	0	0	0	0	0
OG_10301	0	0	0	0.08	0	0	0	0	0	0	0	0	UniRef90_UPI00035D15DC_hypothetical_protein_n=1_Tax=Flavobacterium_rivuli_RepID=UPI00035D15DC
OG_10302	0	0	0	0.08	0	0	0	0	0	0	0	0	UniRef90_UPI0006991F61_hypothetical_protein_n=1_Tax=Aureispira_sp._CCB-QB1_RepID=UPI0006991F61
OG_10303	0	0	0	0	0	0	0	0	0	0	0	0	UniRef90_UPI00037A7EFE_T9SS_C-terminal_target_domain-containing_protein_n=1_Tax=Lewinella_cohaerens_RepID=UPI00037A7EFE
OG_10304	0	0	0	0.4	0.13	0	0	0	0	0	0	0	UniRef90_A0A098S168_Uncharacterized_protein_n=1_Tax=Phaeodactylibacter_xiamenensis_RepID=A0A098S168_9SPHI
OG_10305	0	0	0	1.44	0.13	0.15	0	0	0	0	0	0	UniRef90_M1S6G6_Uncharacterized_protein_n=5_Tax=Morganella_RepID=M1S6G6_MORMO
OG_10306	0	0	0	0.08	0	0.15	0	0	0	0	0	0	UniRef90_A9E0U6_Fibronectin_type_III_domain_protein_n=1_Tax=Kordia_algicida_OT-1_RepID=A9E0U6_9FLAO
OG_10307	0	0	0	0	0.26	0	0	0	0	0	0	0	UniRef90_A0A098LIB6_Uncharacterized_protein_n=2_Tax=Sporocytophaga_myxococcoides_RepID=A0A098LIB6_9BACT
OG_10308	0.05	0	0	0.08	0	0	0	0	0	0	0	0	UniRef90_A0A0C1UVH7_Dienelactone_hydrolase_n=1_Tax=marine_actinobacterium_MedAcidi-G1_RepID=A0A0C1UVH7_9ACTN
OG_10309	0	0	0	0.08	0	0	0	0	0	0	0	0	UniRef90_UPI000697DE37_hypothetical_protein_n=1_Tax=Aureispira_sp._CCB-QB1_RepID=UPI000697DE37
OG_1031	0.28	0	0.34	1.68	2.2	1.46	26.77	42.27	55.46	17.27	20.54	4.96	UniRef90_A0A098SB43_3-octaprenyl-4-hydroxybenzoate_carboxy-lyase_n=1_Tax=Phaeodactylibacter_xiamenensis_RepID=A0A098SB43_9SPHI
OG_10310	0	0	0	0	0	0	0	0	0	0	0	0	UniRef90_UPI000369621B_integrase_n=1_Tax=Spirosoma_panaciterrae_RepID=UPI000369621B
OG_10311	0	0	0	0	0	0	0	0	0	0	0	0	UniRef90_A0A0D6TIL2_Uncharacterized_protein_n=1_Tax=Flavobacterium_sp._316_RepID=A0A0D6TIL2_9FLAO
OG_10312	0	0.15	0	0.08	0	0	0	0	0	0	0	0	UniRef90_UPI0006990D01_hypothetical_protein_n=1_Tax=Aureispira_sp._CCB-QB1_RepID=UPI0006990D01
OG_10313	0	0	0	0	0	0	0	0	0	0	0	0	UniRef90_A0A0F3GS35_Serine/threonine_protein_kinase-like_protein_n=1_Tax=Candidatus_Magnetobacterium_bavaricum_RepID=A0A0F3GS35_9BACT
OG_10314	0.05	0	0	0.16	0	0	0	0	0	0	0	0	UniRef90_UPI0005F1B47E_hypothetical_protein_n=1_Tax=Hymenobacter_sp._AT01-02_RepID=UPI0005F1B47E
OG_10315	0	0.59	0	0.16	0.13	0.15	0	0	0	0	0	0	UniRef90_A0A098S171_Uncharacterized_protein_n=2_Tax=Bacteria_RepID=A0A098S171_9SPHI
OG_10316	0	0	0	0	0	0	0	0	0	0	0	0	UniRef90_UPI000698CB39_hypothetical_protein_n=1_Tax=Aureispira_sp._CCB-QB1_RepID=UPI000698CB39
OG_10317	0	0	0	0	0	0	0	0	0	0	0	0	UniRef90_UPI000696C6B8_hypothetical_protein_n=1_Tax=Aureispira_sp._CCB-QB1_RepID=UPI000696C6B8
OG_10318	0	0	0	0	0	0	0	0	0	0	0	0
OG_10319	0	0	0	0	0	0	0	0	0	0	0	0	UniRef90_UPI00023147D0_MULTISPECIES:_hypothetical_protein_n=1_Tax=Cyanothece_RepID=UPI00023147D0
OG_1032	0.38	0.59	1.01	1.04	0.52	0.44	0	0	0	0	0	0	UniRef90_A0A098SBQ0_GMC_family_oxidoreductase_n=1_Tax=Phaeodactylibacter_xiamenensis_RepID=A0A098SBQ0_9SPHI
OG_10320	0	0	0	0.24	0	0	0	0	0	0	0	0	UniRef90_UPI000695C010_hypothetical_protein_n=1_Tax=Aureispira_sp._CCB-QB1_RepID=UPI000695C010
OG_10321	0	0.59	0.17	0.48	0	0	0	0	0	0	0	0	UniRef90_UPI000698EE6D_hypothetical_protein_n=1_Tax=Aureispira_sp._CCB-QB1_RepID=UPI000698EE6D
OG_10322	0	0	0	0	0	0	0	0	0	0	0	0	UniRef90_UPI00047FFE96_hypothetical_protein_n=1_Tax=Aquimarina_latercula_RepID=UPI00047FFE96
OG_10323	0	0	0	0.08	0	0.15	0	0	0	0	0	0	UniRef90_A0A098SFG2_Uncharacterized_protein_n=1_Tax=Phaeodactylibacter_xiamenensis_RepID=A0A098SFG2_9SPHI
OG_10324	0	0	0	0	0	0	0	0	0	0	0	0	UniRef90_A0A0A6PE27_Uncharacterized_protein_n=1_Tax=Candidatus_Thiomargarita_nelsonii_RepID=A0A0A6PE27_9GAMM
OG_10325	0	0	0	0	0	0	0	0	0	0	0	0	UniRef90_G8R0Z8_Uncharacterized_protein_n=1_Tax=Owenweeksia_hongkongensis_(strain_DSM_17368_/_JCM_12287_/_NRRL_B-23963)_RepID=G8R0Z8_OWEHD
OG_10326	0	0	0	0.08	0.26	0.29	0	0	0	0	0	0	UniRef90_G8TQ95_Uncharacterized_protein_n=1_Tax=Niastella_koreensis_(strain_DSM_17620_/_KACC_11465_/_GR20-10)_RepID=G8TQ95_NIAKG
OG_10327	0	0	0	0	0	0	0	0	0	0	0	0
OG_10328	0	0	0	0	0	0.15	0	0	0	0	0	0	UniRef90_R7ZVU6_Uncharacterized_protein_n=1_Tax=Cyclobacteriaceae_bacterium_AK24_RepID=R7ZVU6_9BACT
OG_10329	0	0	0	0	0	0	0	0	0	0	0	0	UniRef90_E4TUV6_Uncharacterized_protein_n=1_Tax=Marivirga_tractuosa_(strain_ATCC_23168_/_DSM_4126_/_NBRC_15989_/_NCIMB_1408_/_VKM_B-1430_/_H-43)_RepID=E4TUV6_MARTH
OG_1033	0.14	0.15	0.17	2.32	2.45	2.19	3.51	9.54	3.03	13.91	34.76	9.77	UniRef90_A0A098SBD4_ATPase_n=1_Tax=Phaeodactylibacter_xiamenensis_RepID=A0A098SBD4_9SPHI
OG_10330	0	0	0	0	0	0	0	0	0	0	0	0	UniRef90_UPI0006972948_hypothetical_protein_n=1_Tax=Aureispira_sp._CCB-QB1_RepID=UPI0006972948
OG_10331	0	0	0	0	0	0	0	0	0	0	0	0	UniRef90_UPI00069738F4_hypothetical_protein_n=1_Tax=Aureispira_sp._CCB-QB1_RepID=UPI00069738F4
OG_10332	0	0	0	0	0	0	0	0	0	0	0	0	UniRef90_A0A010R7I7_Uncharacterized_protein_n=1_Tax=Colletotrichum_fioriniae_PJ7_RepID=A0A010R7I7_9PEZI
OG_10333	0	0	0	0	0	0	0	0	0	0	0	0	UniRef90_A0A099T7P5_Amino_acid_transporter_n=1_Tax=Thalassobacter_sp._16PALIMAR09_RepID=A0A099T7P5_9RHOB
OG_10334	0	0.15	0.17	0	0	0.15	0	0	0	0	0	0	UniRef90_A1ZHN1_Uncharacterized_protein_n=1_Tax=Microscilla_marina_ATCC_23134_RepID=A1ZHN1_9BACT
OG_10335	0	0	0	0.8	0	0	0	0	0	0	0	0	UniRef90_E3SQP0_Uncharacterized_protein_n=2_Tax=dsDNA_viruses,_no_RNA_stage_RepID=E3SQP0_9CAUD
OG_10336	0	0	0	0	0	0	0	0	0	0	0	0	UniRef90_A0A086AZX3_Uncharacterized_protein_n=1_Tax=Chryseobacterium_sp._JM1_RepID=A0A086AZX3_9FLAO
OG_10337	0	0	0	0	0	0	0	0	0	0	0	0
OG_10338	0	0	0	0	0	0	0	0	0	0	0	0	UniRef90_UPI00069828EE_hypothetical_protein_n=1_Tax=Aureispira_sp._CCB-QB1_RepID=UPI00069828EE
OG_10339	0	0	0	0	0	0	0	0	0	0	0	0	UniRef90_A0A0C1XHK2_Uncharacterized_protein_n=1_Tax=Hassallia_byssoidea_VB512170_RepID=A0A0C1XHK2_9CYAN
OG_1034	0	0.15	0	0	0.13	0	0	0	0	0	0	0	UniRef90_W4Y806_Uncharacterized_protein_n=1_Tax=Strongylocentrotus_purpuratus_RepID=W4Y806_STRPU
OG_10340	0	0	0.34	0.4	0.78	0.15	0	0	0	0	0	0	UniRef90_H6L010_Peptidase_C2_calpain_n=1_Tax=Saprospira_grandis_(strain_Lewin)_RepID=H6L010_SAPGL
OG_10341	0	0	0	0	0	0	0	0	0	0	0	0	UniRef90_A0A0C1U1Y7_Uncharacterized_protein_n=1_Tax=Aphanocapsa_montana_BDHKU210001_RepID=A0A0C1U1Y7_9CHRO
OG_10342	0.09	0.59	0	0.16	0.26	0	0	0	0	0	0	0	UniRef90_UPI000697286C_hypothetical_protein_n=1_Tax=Aureispira_sp._CCB-QB1_RepID=UPI000697286C
OG_10343	0.05	0	0	0.16	0	0	0	0	0	0	0	0	UniRef90_A0A0A6P1Q9_Uncharacterized_protein_n=2_Tax=Candidatus_Thiomargarita_nelsonii_RepID=A0A0A6P1Q9_9GAMM
OG_10344	0.09	0	0	0	0	0	0	0	0	0	0	0	UniRef90_H6L794_Uncharacterized_protein_n=3_Tax=Saprospira_RepID=H6L794_SAPGL
OG_10345	0	0	0	0.08	0	0	0	0	0	0	0	0	UniRef90_UPI000697FD1E_amino_acid_aldolase_n=1_Tax=Aureispira_sp._CCB-QB1_RepID=UPI000697FD1E
OG_10346	0.05	0	0	0	0	0	0	0	0	0	0	0	UniRef90_A8UJK8_Uncharacterized_protein_n=6_Tax=Flavobacteriia_RepID=A8UJK8_9FLAO
OG_10347	0	0	0.17	0	0	0	0	0	0	0	0	0	UniRef90_UPI0006975B10_hypothetical_protein_n=1_Tax=Aureispira_sp._CCB-QB1_RepID=UPI0006975B10
OG_10348	0	0	0	0	0	0	0	0	0	0	0	0	UniRef90_A3HU66_Uncharacterized_protein_n=1_Tax=Algoriphagus_machipongonensis_RepID=A3HU66_9BACT
OG_10349	0	0	0.17	0.08	0	0	0	0	0	0	0	0	UniRef90_G8TDL6_Uncharacterized_protein_n=1_Tax=Niastella_koreensis_(strain_DSM_17620_/_KACC_11465_/_GR20-10)_RepID=G8TDL6_NIAKG
OG_1035	2.13	1.47	4.87	3.36	1.81	1.9	0.14	1.32	0	1.04	1.68	0.44	UniRef90_A0A081C023_Transposase_IS4_family_protein_n=1_Tax=bacterium_UASB270_RepID=A0A081C023_9BACT
OG_10350	0	0	0	0	0	0	0	0	0	0	0	0
OG_10351	0	0	0	0	0	0	0	0	0	0	0	0	UniRef90_M4H967_Internalin_protein_n=1_Tax=Bacillus_cereus_FRI-35_RepID=M4H967_BACCE
OG_10352	0	0	0	0	0	0	0	0	0	0	0	0	UniRef90_UPI00069600A0_metalloenzyme_domain-containing_protein_n=1_Tax=Aureispira_sp._CCB-QB1_RepID=UPI00069600A0
OG_10353	0	0	0	0.24	0.13	0	0	0	0	0	0	0	UniRef90_UPI00036748BA_hypothetical_protein_n=1_Tax=Lewinella_cohaerens_RepID=UPI00036748BA
OG_10354	0.19	0.29	0.5	0.96	1.03	0.29	0	0	0	0	0	0	UniRef90_A0A098S300_Uncharacterized_protein_n=1_Tax=Phaeodactylibacter_xiamenensis_RepID=A0A098S300_9SPHI
OG_10355	0	0	0	0.4	0.39	0	0	0	0	0	0	0	UniRef90_B3ETI0_Uncharacterized_protein_n=2_Tax=Candidatus_Amoebophilus_asiaticus_RepID=B3ETI0_AMOA5
OG_10356	0	0	0	0	0	0	0	0	0	0	0	0	UniRef90_UPI000698D85F_hypothetical_protein_n=1_Tax=Aureispira_sp._CCB-QB1_RepID=UPI000698D85F
OG_10357	0	0	0.34	0.72	0.13	0	0	0	0	0	0	0	UniRef90_C0ING7_Putative_uncharacterized_protein_n=1_Tax=uncultured_bacterium_BLR12_RepID=C0ING7_9BACT
OG_10358	0	0	0	0	0	0	0	0	0	0	0	0
OG_10359	0	0.15	0	0.24	0	0.15	0	0	0	0	0	0	UniRef90_A0A087RXW6_Transposase_DDE_domain_protein_n=8_Tax=Marine_Group_I_RepID=A0A087RXW6_9ARCH
OG_1036	0	0	0.17	0.16	0.26	0	15.54	10.27	15.97	13.91	12.92	2.92	UniRef90_A1ZWK0_D-aminoacyl-tRNA_deacylase_n=1_Tax=Microscilla_marina_ATCC_23134_RepID=A1ZWK0_9BACT
OG_10360	0.09	0	0	0	0	0	0	0	0	0	0	0	UniRef90_A1ZCI8_Methionyl-tRNA_formyltransferase,_putative_n=1_Tax=Microscilla_marina_ATCC_23134_RepID=A1ZCI8_9BACT
OG_10361	0	0	0	0	0	0	0	0	0	0	0	0	UniRef90_UPI000696BE64_hypothetical_protein_n=1_Tax=Aureispira_sp._CCB-QB1_RepID=UPI000696BE64
OG_10362	0	0	0	0.16	0.65	0	0	0	0	0	0	0	UniRef90_G8TQB2_Uncharacterized_protein_n=1_Tax=Niastella_koreensis_(strain_DSM_17620_/_KACC_11465_/_GR20-10)_RepID=G8TQB2_NIAKG
OG_10363	0.05	0.15	0	0.32	0.13	0.15	0	0	0	0	0	0	UniRef90_W8CQ18_Uncharacterized_protein_n=1_Tax=Croceibacter_phage_P2559Y_RepID=W8CQ18_9CAUD
OG_10364	0.24	0	0.34	0	0	0	0	0	0	0	0	0	UniRef90_UPI0006986786_fatty_acid_desaturase_n=1_Tax=Aureispira_sp._CCB-QB1_RepID=UPI0006986786
OG_10365	0	0	0	0	0	0	0	0	0	0	0	0	UniRef90_A0A098RYH6_Uncharacterized_protein_n=2_Tax=Phaeodactylibacter_xiamenensis_RepID=A0A098RYH6_9SPHI
OG_10366	0.05	0.15	0	0	0	0	0	0	0	0	0	0	UniRef90_F4L678_Peptidase_M19_renal_dipeptidase_n=1_Tax=Haliscomenobacter_hydrossis_(strain_ATCC_27775_/_DSM_1100_/_LMG_10767_/_O)_RepID=F4L678_HALH1
OG_10367	0.05	0	0.17	0.08	0	0	0	0	0	0	0	0	UniRef90_K6ZY11_Uncharacterized_protein_n=2_Tax=Glaciecola_RepID=K6ZY11_9ALTE
OG_10368	0.19	0	0	0.48	1.29	0.58	0	0	0	0	0	0	UniRef90_A0A021W408_Uncharacterized_protein_n=2_Tax=Lysobacter_capsici_RepID=A0A021W408_9GAMM
OG_10369	0	0	0	0	0.26	0	0	0	0	0	0	0	UniRef90_H8XP83_Uncharacterized_protein_n=2_Tax=Flavobacterium_RepID=H8XP83_FLAIG
OG_1037	0.24	0.29	0.34	0.48	1.16	0.29	10.9	17.91	14.96	7.52	12.92	3.35	UniRef90_A0A0C1X2J5_Nicotinate-nucleotide_pyrophosphorylase_n=3_Tax=Bacteria_RepID=A0A0C1X2J5_9CHRO
OG_10370	0	0	0	0	0	0	0	0	0	0	0	0	UniRef90_A4AD20_Putative_signal_transduction_protein_n=1_Tax=Congregibacter_litoralis_KT71_RepID=A4AD20_9GAMM
OG_10371	0	0	0	0	0	0	0	0	0	0	0	0	UniRef90_I0K856_Uncharacterized_protein_n=1_Tax=Fibrella_aestuarina_BUZ_2_RepID=I0K856_9BACT
OG_10372	0	0.15	0	0	0	0	0	0	0	0	0	0	UniRef90_B8KPG1_Mannosyl-3-phosphoglycerate_phosphatase_family_protein_n=1_Tax=gamma_proteobacterium_NOR5-3_RepID=B8KPG1_9GAMM
OG_10373	0	0	0.17	0	0	0	0	0	0	0	0	0	UniRef90_D3A0L7_RHS_repeat-associated_core_domain_protein_n=1_Tax=Neisseria_mucosa_ATCC_25996_RepID=D3A0L7_NEIMU
OG_10374	0	0	0	0	0.13	0	0	0	0	0	0	0	UniRef90_A0A098S9V2_Uncharacterized_protein_n=1_Tax=Phaeodactylibacter_xiamenensis_RepID=A0A098S9V2_9SPHI
OG_10375	0	0	0	0	0	0	0	0	0	0	0	0	UniRef90_UPI00067DD1EA_PREDICTED:_uncharacterized_protein_K02A2.6-like_n=2_Tax=Amyelois_transitella_RepID=UPI00067DD1EA
OG_10376	0	0.29	0	0.24	0.13	0.15	0	0	0	0	0	0	UniRef90_A0A081PDS0_Uncharacterized_protein_n=1_Tax=Pedobacter_antarcticus_4BY_RepID=A0A081PDS0_9SPHI
OG_10377	0.19	0.29	0	0	0.52	0	0	0	0	0	0	0	UniRef90_B8KLV4_Cytochrome_c4_n=1_Tax=gamma_proteobacterium_NOR5-3_RepID=B8KLV4_9GAMM
OG_10378	0.05	0.15	0	0	0	0	0	0	0	0	0	0	UniRef90_A4A6B5_Type_III_pantothenate_kinase_n=1_Tax=Congregibacter_litoralis_KT71_RepID=A4A6B5_9GAMM
OG_10379	0	0	0	0	0	0	0	0	0	0	0	0	UniRef90_UPI0006920ED1_hypothetical_protein_n=1_Tax=Prevotella_sp._10(H)_RepID=UPI0006920ED1
OG_1038	0	0.29	0.17	0.08	0.39	0	47.15	69.43	55.8	19.75	33.34	5.98	UniRef90_Q10YP2_Ribosomal_RNA_small_subunit_methyltransferase_E_n=1_Tax=Trichodesmium_erythraeum_(strain_IMS101)_RepID=Q10YP2_TRIEI
OG_10380	0.05	0	0	0	0	0	0	0	0	0	0	0	UniRef90_A0Z0P3_Hypothetical_ParA_family_protein_n=1_Tax=marine_gamma_proteobacterium_HTCC2080_RepID=A0Z0P3_9GAMM
OG_10381	0.05	0	0.17	0	0	0	0	0	0	0	0	0	UniRef90_A0A0H4KZ55_Uncharacterized_protein_n=1_Tax=Marinovum_algicola_DG_898_RepID=A0A0H4KZ55_9RHOB
OG_10382	0	0.29	0	0.08	0	0	0	0	0	0	0	0	UniRef90_A4A858_UDP-2,3-diacylglucosamine_hydrolase_n=1_Tax=Congregibacter_litoralis_KT71_RepID=A4A858_9GAMM
OG_10383	0	0	0	0	0	0	0	0	0	0	0	0	UniRef90_UPI0004051537_hypothetical_protein_n=1_Tax=Epilithonimonas_tenax_RepID=UPI0004051537
OG_10384	0	0	0	0	0	0	0	0	0	0	0	0	UniRef90_A0Z0U7_Uncharacterized_protein_n=1_Tax=marine_gamma_proteobacterium_HTCC2080_RepID=A0Z0U7_9GAMM
OG_10385	0	0	0	0	0	0	0	0	0	0	0	0	UniRef90_A0A0B3TQG1_Cell_division_protein_Fic_n=2_Tax=Burkholderiaceae_RepID=A0A0B3TQG1_9BURK
OG_10386	0.05	0.15	0.5	0.32	0.26	0.58	0	0	0	0	0	0	UniRef90_A0A098RZY2_Uncharacterized_protein_n=1_Tax=Phaeodactylibacter_xiamenensis_RepID=A0A098RZY2_9SPHI
OG_10387	0	0	0	0	0	0.15	0	0	0	0	0	0	UniRef90_A0A098RY80_Uncharacterized_protein_n=2_Tax=Bacteria_RepID=A0A098RY80_9SPHI
OG_10388	0.09	0.29	0	1.52	0	0.29	0	0	0	0	0	0	UniRef90_UPI000590D681_hypothetical_protein_n=1_Tax=Gracilimonas_tropica_RepID=UPI000590D681
OG_10389	0.05	0.29	0	0.24	0	0.15	0	0	0	0	0	0	UniRef90_A0A0C1U7A5_Uncharacterized_protein_n=2_Tax=Bacteria_RepID=A0A0C1U7A5_9CHRO
OG_1039	0.33	0.73	1.18	1.28	1.03	0.44	0	0	0	0	0	0	UniRef90_A0A098RZL1_Tyrosine--tRNA_ligase_n=1_Tax=Phaeodactylibacter_xiamenensis_RepID=A0A098RZL1_9SPHI
OG_10390	0.05	0	0	0.16	0.26	0	0	0	0	0	0	0	UniRef90_A0A098S894_Uncharacterized_protein_n=3_Tax=Bacteria_RepID=A0A098S894_9SPHI
OG_10391	0	0	0	0	0	0	0	0	0	0	0	0	UniRef90_B7RYZ8_Amidohydrolase_family_protein_n=1_Tax=marine_gamma_proteobacterium_HTCC2148_RepID=B7RYZ8_9GAMM
OG_10392	0.09	0.15	0	0	0.13	0	0	0	0	0	0	0	UniRef90_F4KSZ1_Uncharacterized_protein_n=2_Tax=Haliscomenobacter_RepID=F4KSZ1_HALH1
OG_10393	0	0	0	0	0	0	0	0	0	0	0	0	UniRef90_A0A098S0Y1_Uncharacterized_protein_n=1_Tax=Phaeodactylibacter_xiamenensis_RepID=A0A098S0Y1_9SPHI
OG_10394	0	0	0	0	0	0	0	0	0	0	0	0	UniRef90_A0A098SEI4_Uncharacterized_protein_n=1_Tax=Phaeodactylibacter_xiamenensis_RepID=A0A098SEI4_9SPHI
OG_10395	0	0	0	0.08	0	0.15	0	0	0	0	0	0	UniRef90_A0A098S6U7_Uncharacterized_protein_n=2_Tax=Phaeodactylibacter_xiamenensis_RepID=A0A098S6U7_9SPHI
OG_10396	0	0	0	0	0	0	0	0	0	0	0	0	UniRef90_A4A9Q2_Response_regulator_n=2_Tax=unclassified_Gammaproteobacteria_RepID=A4A9Q2_9GAMM
OG_10397	0.05	0	0	0.16	0	0.15	0	0	0	0	0	0	UniRef90_A0A098S449_Uncharacterized_protein_n=1_Tax=Phaeodactylibacter_xiamenensis_RepID=A0A098S449_9SPHI
OG_10398	0.05	0	0	0.24	0.39	0.29	0	0	0	0	0	0	UniRef90_A0A098SAR1_Uncharacterized_protein_n=1_Tax=Phaeodactylibacter_xiamenensis_RepID=A0A098SAR1_9SPHI
OG_10399	0	0	0	0	0.13	0	0	0	0	0	0	0	UniRef90_A0A098S0L7_Uncharacterized_protein_n=1_Tax=Phaeodactylibacter_xiamenensis_RepID=A0A098S0L7_9SPHI
OG_104	11.28	3.96	12.44	5.92	5.56	3.5	0	0	0	0	0	0	UniRef90_A0A0D3LDU0_Anti-FecI_sigma_factor,_FecR_n=1_Tax=Flammeovirgaceae_bacterium_311_RepID=A0A0D3LDU0_9BACT
OG_1040	0.05	0.73	0.67	1.04	1.81	0.29	56.44	120.66	95.46	89.73	72.36	16.62	UniRef90_Q10ZL5_Octanoyltransferase_n=1_Tax=Trichodesmium_erythraeum_(strain_IMS101)_RepID=LIPB_TRIEI
OG_10400	0	0	0	0.24	0	0	0	0	0	0	0	0	UniRef90_UPI00035F25D7_hypothetical_protein_n=1_Tax=Flexithrix_dorotheae_RepID=UPI00035F25D7
OG_10401	0	0	0	0.08	0	0	0	0	0	0	0	0	UniRef90_A0A098S7D0_Uncharacterized_protein_n=1_Tax=Phaeodactylibacter_xiamenensis_RepID=A0A098S7D0_9SPHI
OG_10402	0	0	0.17	0.16	0	0	0	0	0	0	0	0	UniRef90_A0A098S719_Uncharacterized_protein_n=2_Tax=Bacteria_RepID=A0A098S719_9SPHI
OG_10403	0	0	0	0.08	0.13	0	0	0	0	0	0	0	UniRef90_A0A098S9N9_Phosphoadenosine_phosphosulfate_reductase_n=2_Tax=Bacteria_RepID=A0A098S9N9_9SPHI
OG_10404	0.05	0	0.17	0	0	0	0	0	0	0	0	0	UniRef90_A0A098S7M0_Acetyltransferase_n=1_Tax=Phaeodactylibacter_xiamenensis_RepID=A0A098S7M0_9SPHI
OG_10405	0	0	0	0	0	0.15	0	0	0	0	0	0
OG_10406	0	0	0	0.32	0	0	0	0	0	0	0	0	UniRef90_UPI00037A987B_hypothetical_protein_n=1_Tax=Lewinella_cohaerens_RepID=UPI00037A987B
OG_10407	0.19	1.32	0.17	0.88	0.52	0.15	0	0	0	0	0	0	UniRef90_A0A0C1TQQ3_Uncharacterized_protein_(Fragment)_n=2_Tax=Bacteria_RepID=A0A0C1TQQ3_9CHRO
OG_10408	0	0	0	0.24	0	0	0	0	0	0	0	0	UniRef90_UPI0006854DE7_hypothetical_protein_n=1_Tax=Enterovibrio_calviensis_RepID=UPI0006854DE7
OG_10409	0.33	1.17	0.34	0.48	3.88	3.06	0	0	0	0	0	0	UniRef90_A0A098S0I7_Uncharacterized_protein_n=2_Tax=Phaeodactylibacter_xiamenensis_RepID=A0A098S0I7_9SPHI
OG_1041	0.47	1.03	2.18	1.52	2.97	2.33	559.86	102.02	120.34	546.43	415.15	135.3	UniRef90_UPI0005C66287_ferrochelatase_n=1_Tax=Phaeodactylibacter_xiamenensis_RepID=UPI0005C66287
OG_10410	0.19	0	0.17	0.32	0.13	0	0	0	0	0	0	0	UniRef90_A0A098SBQ2_Uncharacterized_protein_n=2_Tax=Phaeodactylibacter_xiamenensis_RepID=A0A098SBQ2_9SPHI
OG_10411	0	0	0.17	0.16	0	0.15	0	0	0	0	0	0	UniRef90_A0A098S333_Uncharacterized_protein_n=1_Tax=Phaeodactylibacter_xiamenensis_RepID=A0A098S333_9SPHI
OG_10412	0.09	0	0	0.16	0.26	0	0	0	0	0	0	0	UniRef90_A0A098SBX5_Uncharacterized_protein_n=1_Tax=Phaeodactylibacter_xiamenensis_RepID=A0A098SBX5_9SPHI
OG_10413	0.14	0	0	0.24	0	0	0	0	0	0	0	0	UniRef90_A0A098SBF5_Uncharacterized_protein_n=2_Tax=Phaeodactylibacter_xiamenensis_RepID=A0A098SBF5_9SPHI
OG_10414	0.09	0.15	0.17	0.32	0	0.15	0	0	0	0	0	0	UniRef90_A0A098S6R9_Uncharacterized_protein_n=1_Tax=Phaeodactylibacter_xiamenensis_RepID=A0A098S6R9_9SPHI
OG_10415	0	0	0	0.24	0	0	0	0	0	0	0	0	UniRef90_A0A098S5M0_Uncharacterized_protein_n=1_Tax=Phaeodactylibacter_xiamenensis_RepID=A0A098S5M0_9SPHI
OG_10416	0	0	0.84	0.48	0.39	0.29	0	0	0	0	0	0	UniRef90_F4KTG1_Uncharacterized_protein_n=1_Tax=Haliscomenobacter_hydrossis_(strain_ATCC_27775_/_DSM_1100_/_LMG_10767_/_O)_RepID=F4KTG1_HALH1
OG_10417	0.05	0.29	0	0.24	0.13	0	0	0	0	0	0	0	UniRef90_A0A098RYA3_Uncharacterized_protein_n=3_Tax=Bacteria_RepID=A0A098RYA3_9SPHI
OG_10418	0.05	0.15	0	0.24	0.13	0	0	0	0	0	0	0	UniRef90_A0A098S951_Uncharacterized_protein_n=1_Tax=Phaeodactylibacter_xiamenensis_RepID=A0A098S951_9SPHI
OG_10419	0	0	0	0.08	0	0	0	0	0	0	0	0	UniRef90_A0A098S7J1_Uncharacterized_protein_n=1_Tax=Phaeodactylibacter_xiamenensis_RepID=A0A098S7J1_9SPHI
OG_1042	1.85	1.17	0.34	0.4	0.13	0.15	7.2	5.72	6.72	1.28	3.62	1.46	UniRef90_A0A098S342_Exodeoxyribonuclease_7_large_subunit_n=1_Tax=Phaeodactylibacter_xiamenensis_RepID=A0A098S342_9SPHI
OG_10420	0	0.15	0	0.32	0	0	0	0	0	0	0	0	UniRef90_A0A098S7I4_Uncharacterized_protein_n=2_Tax=Bacteria_RepID=A0A098S7I4_9SPHI
OG_10421	0	0	0	0	0	0	0	0	0	0	0	0	UniRef90_A0A098S839_Uncharacterized_protein_n=2_Tax=Bacteria_RepID=A0A098S839_9SPHI
OG_10422	0	0.15	0	0.08	0	0	0	0	0	0	0	0	UniRef90_A0A098S236_Xaa-Pro_dipeptidyl-peptidase_n=1_Tax=Phaeodactylibacter_xiamenensis_RepID=A0A098S236_9SPHI
OG_10423	0	0	0.34	1.04	0.26	0.15	0	0	0	0	0	0	UniRef90_A0A098SBD5_Uncharacterized_protein_n=1_Tax=Phaeodactylibacter_xiamenensis_RepID=A0A098SBD5_9SPHI
OG_10424	0.05	0	0.34	0.16	0	0	0	0	0	0	0	0	UniRef90_A0A098SBY9_Uncharacterized_protein_n=1_Tax=Phaeodactylibacter_xiamenensis_RepID=A0A098SBY9_9SPHI
OG_10425	0	0	0	0.48	0.13	0.44	0	0	0	0	0	0	UniRef90_A0A0C1V015_Uncharacterized_protein_n=3_Tax=Cyanobacteria_RepID=A0A0C1V015_9CYAN
OG_10426	0	0.15	0	0.16	0	0	0	0	0	0	0	0	UniRef90_UPI0006945441_hypothetical_protein_n=1_Tax=Aphanocapsa_montana_RepID=UPI0006945441
OG_10427	0	0	0	0.08	0	0	0	0	0	0	0	0	UniRef90_A0A0E2I2R3_Uncharacterized_protein_n=6_Tax=Flavobacteriaceae_RepID=A0A0E2I2R3_9FLAO
OG_10428	0	0	0	0.08	0	0	0	0	0	0	0	0	UniRef90_A0A098SB53_Uncharacterized_protein_n=1_Tax=Phaeodactylibacter_xiamenensis_RepID=A0A098SB53_9SPHI
OG_10429	0	0	0	0.08	0.13	0	0	0	0	0	0	0	UniRef90_A0A098S2A8_Uncharacterized_protein_n=1_Tax=Phaeodactylibacter_xiamenensis_RepID=A0A098S2A8_9SPHI
OG_1043	0.28	0.15	2.35	1.44	1.03	0.58	78.09	97.91	91.09	67.81	84.11	21.87	UniRef90_A0A098S9B1_RNA_methyltransferase_n=1_Tax=Phaeodactylibacter_xiamenensis_RepID=A0A098S9B1_9SPHI
OG_10430	0	1.03	0	0	1.03	0	0	0	0	0	0	0
OG_10431	0.09	0.15	0.17	0	0	0	0	0	0	0	0	0	UniRef90_Q1GI04_Peptidoglycan-binding_LysM_n=1_Tax=Ruegeria_sp._(strain_TM1040)_RepID=Q1GI04_RUEST
OG_10432	0.14	0	0	0.08	0	0.29	0	0	0	0	0	0	UniRef90_A0A098SA62_Uncharacterized_protein_n=1_Tax=Phaeodactylibacter_xiamenensis_RepID=A0A098SA62_9SPHI
OG_10433	0	0	0	0	0	0	0	0	0	0	0	0	UniRef90_A0A098S6S8_Uncharacterized_protein_n=1_Tax=Phaeodactylibacter_xiamenensis_RepID=A0A098S6S8_9SPHI
OG_10434	0	0	0	0	0.13	0	0	0	0	0	0	0	UniRef90_A0A098S5K7_Uncharacterized_protein_n=1_Tax=Phaeodactylibacter_xiamenensis_RepID=A0A098S5K7_9SPHI
OG_10435	0.09	0	0	0.4	0	0.15	0	0	0	0	0	0	UniRef90_A0A098S4C0_Uncharacterized_protein_n=1_Tax=Phaeodactylibacter_xiamenensis_RepID=A0A098S4C0_9SPHI
OG_10436	0	0	0	0.16	0	0	0	0	0	0	0	0	UniRef90_A0A098S2J8_Uncharacterized_protein_n=1_Tax=Phaeodactylibacter_xiamenensis_RepID=A0A098S2J8_9SPHI
OG_10437	0	0.15	0	0	0	0	0	0	0	0	0	0	UniRef90_A0A098S2H6_Uncharacterized_protein_n=1_Tax=Phaeodactylibacter_xiamenensis_RepID=A0A098S2H6_9SPHI
OG_10438	0	0	0	0	0	0	0	0	0	0	0	0	UniRef90_A0A0C1VX98_Uncharacterized_protein_n=1_Tax=Aphanocapsa_montana_BDHKU210001_RepID=A0A0C1VX98_9CHRO
OG_10439	0	0	0	0.08	0	0	0	0	0	0	0	0
OG_1044	0.14	0.15	1.18	0.56	0.13	0	15.49	12.92	16.64	20.87	14.34	4.23	UniRef90_F4L6N4_Leucyl/phenylalanyl-tRNA--protein_transferase_n=1_Tax=Haliscomenobacter_hydrossis_(strain_ATCC_27775_/_DSM_1100_/_LMG_10767_/_O)_RepID=F4L6N4_HALH1
OG_10440	0	0	0	0.16	0	0	0	0	0	0	0	0	UniRef90_R7ZRF3_Uncharacterized_protein_n=1_Tax=Cyclobacteriaceae_bacterium_AK24_RepID=R7ZRF3_9BACT
OG_10441	0	0.15	0	0.32	0.13	0	0	0	0	0	0	0	UniRef90_UPI0005C71E44_hypothetical_protein_n=1_Tax=Phaeodactylibacter_xiamenensis_RepID=UPI0005C71E44
OG_10442	0	0.29	0	0.24	0	0	0	0	0	0	0	0	UniRef90_UPI00068FACF2_MULTISPECIES:_hypothetical_protein_n=2_Tax=Bacteria_RepID=UPI00068FACF2
OG_10443	0.09	0	0	0.32	0.52	0	0	0	0	0	0	0	UniRef90_A0A098SBI4_Uncharacterized_protein_n=1_Tax=Phaeodactylibacter_xiamenensis_RepID=A0A098SBI4_9SPHI
OG_10444	0.09	0	0.17	0.08	0	0	0	0	0	0	0	0	UniRef90_A0A098RYT7_Uncharacterized_protein_n=1_Tax=Phaeodactylibacter_xiamenensis_RepID=A0A098RYT7_9SPHI
OG_10445	0	0	0	0.08	0	0	0	0	0	0	0	0	UniRef90_UPI000426ACCD_hypothetical_protein_n=1_Tax=Spirochaeta_cellobiosiphila_RepID=UPI000426ACCD
OG_10446	0	0	0	0.08	0	0	0	0	0	0	0	0	UniRef90_A0A098S4U0_Uncharacterized_protein_n=1_Tax=Phaeodactylibacter_xiamenensis_RepID=A0A098S4U0_9SPHI
OG_10447	0	0	0	0	0	0	0	0	0	0	0	0	UniRef90_A0A098S252_Uncharacterized_protein_n=1_Tax=Phaeodactylibacter_xiamenensis_RepID=A0A098S252_9SPHI
OG_10448	0	0	0	0	0.13	0.29	0	0	0	0	0	0	UniRef90_A0A0F2P1Z6_Uncharacterized_protein_n=1_Tax=Flavobacteriales_bacterium_BRH_c54_RepID=A0A0F2P1Z6_9FLAO
OG_10449	0	0	0.17	0.08	0.26	0.15	0	0	0	0	0	0	UniRef90_A0A098RZA3_Uncharacterized_protein_n=1_Tax=Phaeodactylibacter_xiamenensis_RepID=A0A098RZA3_9SPHI
OG_1045	0.05	0	0	0.48	0	0.15	1984.06	36.7	135.97	2954.22	1928.18	555.91	UniRef90_A0A098SBZ5_Methyltransferase_n=3_Tax=Bacteria_RepID=A0A098SBZ5_9SPHI
OG_10450	0.09	0.88	0.84	0.72	0.9	0.29	0	0	0	0	0	0	UniRef90_A0A098S9P5_Uncharacterized_protein_n=1_Tax=Phaeodactylibacter_xiamenensis_RepID=A0A098S9P5_9SPHI
OG_10451	0.05	0	0	0	0	0	0	0	0	0	0	0	UniRef90_A0A098S416_Uncharacterized_protein_n=1_Tax=Phaeodactylibacter_xiamenensis_RepID=A0A098S416_9SPHI
OG_10452	0.05	0.15	0	0	0	0	0	0	0	0	0	0	UniRef90_A0A098S4C5_Uncharacterized_protein_n=1_Tax=Phaeodactylibacter_xiamenensis_RepID=A0A098S4C5_9SPHI
OG_10453	0.09	0	0.17	0.16	0	0	0	0	0	0	0	0	UniRef90_A0A098SDF5_Uncharacterized_protein_n=3_Tax=Bacteria_RepID=A0A098SDF5_9SPHI
OG_10454	0	0	0	0.08	0	0	0	0	0	0	0	0	UniRef90_G0J4X6_Endonuclease/exonuclease/phosphatase_n=2_Tax=Cyclobacterium_marinum_RepID=G0J4X6_CYCMS
OG_10455	0	0	0	0	0.13	0	0	0	0	0	0	0	UniRef90_UPI000698B0BE_glycosyl_hydrolase_n=1_Tax=Phaeodactylibacter_xiamenensis_RepID=UPI000698B0BE
OG_10456	0	0	0	0	0	0	0	0	0	0	0	0	UniRef90_A3PCY6_Possible_Carboxylesterase_n=32_Tax=Prochlorococcaceae_RepID=A3PCY6_PROM0
OG_10457	1.66	0	2.86	0	0	0	0	0	0	0	0	0	UniRef90_B4WP60_Putative_uncharacterized_protein_n=2_Tax=Synechococcus_sp._PCC_7335_RepID=B4WP60_9SYNE
OG_10458	0	0.15	0	0.08	0.26	0	0	0	0	0	0	0	UniRef90_UPI00037CC8CB_hypothetical_protein_n=1_Tax=Colwellia_piezophila_RepID=UPI00037CC8CB
OG_10459	0.05	0	0	0	0	0	0	0	0	0	0	0	UniRef90_UPI000497F1A7_hypothetical_protein_n=1_Tax=Marinilabilia_salmonicolor_RepID=UPI000497F1A7
OG_1046	0	0	0	0	0.52	0.73	0	0.59	0	0.08	0.52	0.29	UniRef90_C3ZL08_Putative_uncharacterized_protein_n=1_Tax=Branchiostoma_floridae_RepID=C3ZL08_BRAFL
OG_10460	0	0.15	0	0.08	0	0	0	0	0	0	0	0	UniRef90_A0A098S3I2_Uncharacterized_protein_n=1_Tax=Phaeodactylibacter_xiamenensis_RepID=A0A098S3I2_9SPHI
OG_10461	0.05	0.15	0	0.4	0.26	0.44	0	0	0	0	0	0	UniRef90_A0A0C1TSM9_Uncharacterized_protein_n=2_Tax=Bacteria_RepID=A0A0C1TSM9_9CHRO
OG_10462	0	0	0	0	0	0	0	0	0	0	0	0	UniRef90_A0A0C1U3K6_Uncharacterized_protein_n=1_Tax=Aphanocapsa_montana_BDHKU210001_RepID=A0A0C1U3K6_9CHRO
OG_10463	0	0	0	0	0	0.15	0	0	0	0	0	0	UniRef90_UPI000696CF25_hypothetical_protein_n=1_Tax=Phaeodactylibacter_xiamenensis_RepID=UPI000696CF25
OG_10464	0	0	0	0.08	0	0	0	0	0	0	0	0
OG_10465	0	0	0	0.16	0	0	0	0	0	0	0	0	UniRef90_I0K5L6_Xylose_isomerase_domain_protein_TIM_barrel_n=1_Tax=Fibrella_aestuarina_BUZ_2_RepID=I0K5L6_9BACT
OG_10466	0	0	0	0	0	0	0	0	0	0	0	0	UniRef90_A0A0A7K5K3_Membrane_protein_n=3_Tax=Cellulophaga_RepID=A0A0A7K5K3_9FLAO
OG_10467	0	3.82	0.5	0.88	2.33	1.31	0	0	0	0	0	0	UniRef90_UPI00036B8BE6_hypothetical_protein_n=1_Tax=Lewinella_cohaerens_RepID=UPI00036B8BE6
OG_10468	0	0.44	0	0.16	0	0	0	0	0	0	0	0	UniRef90_S5BZW3_Uncharacterized_protein_n=2_Tax=Alteromonadaceae_RepID=S5BZW3_ALTMA
OG_10469	0.05	0	0	0.16	0.13	0.15	0	0	0	0	0	0	UniRef90_A0A098S3Y4_Uncharacterized_protein_n=1_Tax=Phaeodactylibacter_xiamenensis_RepID=A0A098S3Y4_9SPHI
OG_1047	0	0.29	0	0.56	0.26	0.73	112.4	90.27	97.48	53.18	62.02	9.48	UniRef90_A0A098SDD6_Glutamate_racemase_n=2_Tax=Bacteria_RepID=A0A098SDD6_9SPHI
OG_10470	0	0.29	0.34	0	0	0	0	0	0	0	0	0	UniRef90_A4A8K0_Tfp_pilus_assembly_protein_PilN_n=2_Tax=unclassified_Gammaproteobacteria_RepID=A4A8K0_9GAMM
OG_10471	0	0	0	0	0	0	0	0	0	0	0	0	UniRef90_A0A0B3ZA68_Pilus_assembly_protein_PilP_n=4_Tax=Alteromonas_RepID=A0A0B3ZA68_9ALTE
OG_10472	0.05	0.15	0	0.32	0.26	0	0	0	0	0	0	0	UniRef90_A0A098S9C1_Uncharacterized_protein_n=1_Tax=Phaeodactylibacter_xiamenensis_RepID=A0A098S9C1_9SPHI
OG_10473	0	0	0	0.24	0	0	0	0	0	0	0	0	UniRef90_A0A098S033_Uncharacterized_protein_n=1_Tax=Phaeodactylibacter_xiamenensis_RepID=A0A098S033_9SPHI
OG_10474	0	0	0	0	0	0	0	0	0	0	0	0	UniRef90_A0A059FRQ8_VWA_domain-containing_protein_n=1_Tax=Hyphomonas_johnsonii_MHS-2_RepID=A0A059FRQ8_9RHOB
OG_10475	0.05	0.15	0	0.08	0	0	0	0	0	0	0	0	UniRef90_UPI000697E4ED_hypothetical_protein_n=1_Tax=Aureispira_sp._CCB-QB1_RepID=UPI000697E4ED
OG_10476	0	0	0.34	0.16	0	0	0	0	0	0	0	0	UniRef90_T2KPX6_N-acyl-D-glucosamine_2-epimerase_n=1_Tax=Formosa_agariphila_KMM_3901_RepID=T2KPX6_9FLAO
OG_10477	303	542.88	889.36	106.85	84.08	37.31	0	0	0	0	0	0	UniRef90_A0A078G2X3_BnaC09g29270D_protein_n=1_Tax=Brassica_napus_RepID=A0A078G2X3_BRANA
OG_10478	0.05	0.15	0	0	0	0	0	0	0	0	0	0	UniRef90_A0A0A2H118_Virulence-associated_E_family_protein_n=2_Tax=Elizabethkingia_miricola_RepID=A0A0A2H118_ELIMR
OG_10479	0	0	0	0.48	0.39	0	0	0	0	0	0	0	UniRef90_W8CQM7_Putative_tail_protein_n=1_Tax=Croceibacter_phage_P2559Y_RepID=W8CQM7_9CAUD
OG_1048	0.09	0.59	0.5	0.8	0.52	0.29	5.92	7.93	7.9	6.4	9.56	2.04	UniRef90_A0A098S4I5_Uncharacterized_protein_n=1_Tax=Phaeodactylibacter_xiamenensis_RepID=A0A098S4I5_9SPHI
OG_10480	0	0	0	0	0	0	0	0	0	0	0	0	UniRef90_H3NTN4_Na+/melibiose_symporter-like_transporter_n=1_Tax=gamma_proteobacterium_HIMB55_RepID=H3NTN4_9GAMM
OG_10481	0	0	0	0	0.26	0	0	0	0	0	0	0	UniRef90_UPI0003626265_hypothetical_protein_n=1_Tax=Flexithrix_dorotheae_RepID=UPI0003626265
OG_10482	0	0	0	0.08	0	0	0	0	0	0	0	0	UniRef90_A4AA43_Nucleotidyltransferase/DNA_polymerase_involved_in_DNA_repair_n=2_Tax=Congregibacter_RepID=A4AA43_9GAMM
OG_10483	5.78	0.44	0	0	0	0	0	0	0	0	0	0	UniRef90_A4A849_Putative_membrane_protein,_required_for_colicin_V_production_n=1_Tax=Congregibacter_litoralis_KT71_RepID=A4A849_9GAMM
OG_10484	0	0	0	0.16	0.13	0.15	0	0	0	0	0	0	UniRef90_L0D9P8_Fucose_permease_n=1_Tax=Singulisphaera_acidiphila_(strain_ATCC_BAA-1392_/_DSM_18658_/_VKM_B-2454_/_MOB10)_RepID=L0D9P8_SINAD
OG_10485	0.14	0	0	0	0	0	0	0	0	0	0	0	UniRef90_A0A0D1D9P1_Jannaschia_aquimarina_strain_GSW-M26_jaqu_contig000029,_whole_genome_shotgun_sequence_n=1_Tax=Jannaschia_aquimarina_RepID=A0A0D1D9P1_9RHOB
OG_10486	0	0	0.5	0	0	0	0	0	0	0	0	0	UniRef90_A0A0C1X3G8_Uncharacterized_protein_n=2_Tax=Oscillatoriophycideae_RepID=A0A0C1X3G8_9CHRO
OG_10487	0	0	0	0.16	0.13	0	0	0	0	0	0	0	UniRef90_A0A098S127_Uncharacterized_protein_n=2_Tax=Phaeodactylibacter_xiamenensis_RepID=A0A098S127_9SPHI
OG_10488	0	0	0	0.32	0	0.15	0	0	0	0	0	0	UniRef90_F6GDN6_Uncharacterized_protein_n=1_Tax=Lacinutrix_sp._(strain_5H-3-7-4)_RepID=F6GDN6_LACS5
OG_10489	0	0	0	0.08	0	0	0	0	0	0	0	0	UniRef90_UPI000417F8C4_hypothetical_protein_n=1_Tax=Runella_zeae_RepID=UPI000417F8C4
OG_1049	0.24	0.29	0	1.76	1.16	0.58	0	0	0	0	0	0	UniRef90_A0A098S6U0_DEAD/DEAH_box_helicase_n=1_Tax=Phaeodactylibacter_xiamenensis_RepID=A0A098S6U0_9SPHI
OG_10490	0	0	0	0.64	0.13	0.15	0	0	0	0	0	0	UniRef90_A0A0F9P5C5_Uncharacterized_protein_n=1_Tax=marine_sediment_metagenome_RepID=A0A0F9P5C5_9ZZZZ
OG_10491	0	0	0	0.16	0	0.15	0	0	0	0	0	0	UniRef90_H6BJ74_Putative_uncharacterized_protein_n=1_Tax=Methylophilales_phage_HIM624-A_RepID=H6BJ74_9VIRU
OG_10492	0	0	0	0	0	0	0	0	0	0	0	0	UniRef90_H6WFW0_Virion_structural_protein_n=1_Tax=Cyanophage_S-TIM5_RepID=H6WFW0_9CAUD
OG_10493	0.05	0	0	0	0	0.15	1.85	9.69	6.22	3.6	7.62	1.6	UniRef90_D6U0E1_Sarcosine_oxidase_n=1_Tax=Ktedonobacter_racemifer_DSM_44963_RepID=D6U0E1_9CHLR
OG_10494	0	0	0	0.24	0.65	0.15	0	0	0	0	0	0	UniRef90_UPI00037AD0D8_hypothetical_protein_n=1_Tax=Lewinella_cohaerens_RepID=UPI00037AD0D8
OG_10495	0	0	0	0.16	0	0.15	0	0	0	0	0	0	UniRef90_A0A098S6E1_Uncharacterized_protein_n=1_Tax=Phaeodactylibacter_xiamenensis_RepID=A0A098S6E1_9SPHI
OG_10496	0	0	0	0	0	0.15	0	0	0	0	0	0	UniRef90_F4KZF8_Uncharacterized_protein_n=1_Tax=Haliscomenobacter_hydrossis_(strain_ATCC_27775_/_DSM_1100_/_LMG_10767_/_O)_RepID=F4KZF8_HALH1
OG_10497	0	0	0	0	0	0	0	0	0	0	0	0	UniRef90_A9DU98_Uncharacterized_protein_n=1_Tax=Kordia_algicida_OT-1_RepID=A9DU98_9FLAO
OG_10498	0	0	0	0.08	0	0.15	0	0	0	0	0	0	UniRef90_UPI00035EE126_hypothetical_protein_n=1_Tax=Lewinella_cohaerens_RepID=UPI00035EE126
OG_10499	0	0	0	0	0	0	0	0	0	0	0	0	UniRef90_UPI00047CA70A_hypothetical_protein_n=1_Tax=Cohnella_panacarvi_RepID=UPI00047CA70A
OG_105	0.14	0.88	0	2.4	2.45	2.04	0	0	0	0	0	0	UniRef90_UPI0005C75C5F_hypothetical_protein_n=1_Tax=Flammeovirga_sp._OC4_RepID=UPI0005C75C5F
OG_1050	0.19	1.32	1.85	2.08	1.55	0.29	111.78	28.18	74.96	54.14	44.45	18.81	UniRef90_A0A098S1K2_30S_ribosomal_protein_S18_n=1_Tax=Phaeodactylibacter_xiamenensis_RepID=A0A098S1K2_9SPHI
OG_10500	0	0	0	0	0	0	0	0	0	0	0	0	UniRef90_UPI0003788EB7_hypothetical_protein_n=1_Tax=Flexithrix_dorotheae_RepID=UPI0003788EB7
OG_10501	0	0	0	0	0	0	0	0	0	0	0	0	UniRef90_A0A0A2N8I9_Amidase_n=6_Tax=Alcaligenes_RepID=A0A0A2N8I9_ALCFA
OG_10502	0.05	0	0	0.08	0	0.15	0	0	0	0	0	0	UniRef90_F4L0V4_Plasmid_stabilization_system_n=1_Tax=Haliscomenobacter_hydrossis_(strain_ATCC_27775_/_DSM_1100_/_LMG_10767_/_O)_RepID=F4L0V4_HALH1
OG_10503	0	0	0	0	0.13	0.15	0	0	0	0	0	0	UniRef90_A0A023BMZ9_Uncharacterized_protein_n=3_Tax=Aquimarina_RepID=A0A023BMZ9_9FLAO
OG_10504	0	0	0	0.08	0.26	0.15	0	0	0	0	0	0	UniRef90_A0A095VTD8_Uncharacterized_protein_n=1_Tax=Pseudohaliea_rubra_DSM_19751_RepID=A0A095VTD8_9GAMM
OG_10505	0	0	0	0.24	0	0	0	0	0	0	0	0
OG_10506	0	0	0.17	0.08	0.13	0	0	0	0	0	0	0	UniRef90_A0A066WZZ6_Uncharacterized_protein_n=1_Tax=Flavobacterium_sp._EM1321_RepID=A0A066WZZ6_9FLAO
OG_10507	0	0	0	0	0	0	0	0	0	0	0	0	UniRef90_A1ZDC7_Uncharacterized_protein_n=1_Tax=Microscilla_marina_ATCC_23134_RepID=A1ZDC7_9BACT
OG_10508	0.05	0	0	0	0.78	0.29	0	0	0	0	0	0	UniRef90_UPI00034A2E6D_hypothetical_protein_n=1_Tax=Nafulsella_turpanensis_RepID=UPI00034A2E6D
OG_10509	0.05	1.17	0	5.12	2.33	1.9	0	0	0	0	0	0	UniRef90_A4AN96_Uncharacterized_protein_n=1_Tax=Maribacter_sp._(strain_HTCC2170_/_KCCM_42371)_RepID=A4AN96_MARSH
OG_1051	3.02	0.51	0.5	3.68	1.04	0.44	591.1	391.7	213.27	661.83	405.19	125.82	UniRef90_Q119D9_Protein_splicing_site_n=1_Tax=Trichodesmium_erythraeum_(strain_IMS101)_RepID=Q119D9_TRIEI
OG_10510	0	0	0	0	0	0	0	0	0	0	0	0	UniRef90_E3SN02_Putative_uncharacterized_protein_n=2_Tax=unclassified_Myoviridae_RepID=E3SN02_9CAUD
OG_10511	0.09	0.29	1.18	0.64	3.49	0.73	0	0	0	0	0	0	UniRef90_H8ZMY4_HN_hemagglutinin_domain_protein_n=1_Tax=Synechococcus_phage_metaG-MbCM1_RepID=H8ZMY4_9CAUD
OG_10512	0	0	0	0	0	0	0	0	0	0	0	0	UniRef90_UPI00037144A8_hypothetical_protein_n=1_Tax=Lewinella_cohaerens_RepID=UPI00037144A8
OG_10513	0	0	0	0	0	0	0	0	0	0	0	0	UniRef90_A0A0C1TT32_Uncharacterized_protein_n=2_Tax=Aphanocapsa_RepID=A0A0C1TT32_9CHRO
OG_10514	0	0.15	1.18	0.08	0.52	0	0	0	0	0	0	0	UniRef90_G8R7J4_Ankyrin_repeat-containing_protein_n=1_Tax=Owenweeksia_hongkongensis_(strain_DSM_17368_/_JCM_12287_/_NRRL_B-23963)_RepID=G8R7J4_OWEHD
OG_10515	0.14	0.15	0.17	0.08	0.13	0	0	0	0	0	0	0	UniRef90_T2KSA6_Flavodoxin/nitric_oxide_synthase_n=1_Tax=Formosa_agariphila_KMM_3901_RepID=T2KSA6_9FLAO
OG_10516	0	0	0	0.16	0.52	0	0	0	0	0	0	0
OG_10517	0	0	0	0.08	0.13	0	0	0	0	0	0	0	UniRef90_UPI000376D2B3_hypothetical_protein_n=1_Tax=Lewinella_cohaerens_RepID=UPI000376D2B3
OG_10518	0	0.29	0.17	0	0	0.15	0	0	0	0	0	0	UniRef90_C5F0T0_META_domain_protein_n=1_Tax=Helicobacter_pullorum_MIT_98-5489_RepID=C5F0T0_9HELI
OG_10519	0	0	0	0.08	0	0	0	0	0	0	0	0	UniRef90_UPI000361FDD1_hypothetical_protein_n=1_Tax=Lewinella_cohaerens_RepID=UPI000361FDD1
OG_1052	0.05	0.44	0.17	0.8	0.52	0.15	0	0	0	0	0	0	UniRef90_UPI000475764E_acyl-peptide_hydrolase_n=1_Tax=Flexithrix_dorotheae_RepID=UPI000475764E
OG_10520	0	0	0.17	0.56	0.52	0.29	0	0	0	0	0	0	UniRef90_A0A0A2MTC3_Uncharacterized_protein_n=1_Tax=Flavobacterium_enshiense_DK69_RepID=A0A0A2MTC3_9FLAO
OG_10521	0	0	0	0.16	0.26	0	0	0	0	0	0	0	UniRef90_D1CC70_Beta-xylanase_n=1_Tax=Thermobaculum_terrenum_(strain_ATCC_BAA-798_/_YNP1)_RepID=D1CC70_THET1
OG_10522	0	0	0	0.08	0	0	0	0	0	0	0	0	UniRef90_C7PB33_Uncharacterized_protein_n=1_Tax=Chitinophaga_pinensis_(strain_ATCC_43595_/_DSM_2588_/_NCIB_11800_/_UQM_2034)_RepID=C7PB33_CHIPD
OG_10523	0	0	0	0.24	0.26	0	0	0	0	0	0	0
OG_10524	0	0	0	0	0.13	0	0	0	0	0	0	0	UniRef90_UPI00035C73D7_hypothetical_protein_n=1_Tax=Lewinella_cohaerens_RepID=UPI00035C73D7
OG_10525	0	0	0	0.16	0	0	0	0	0	0	0	0	UniRef90_D2QN80_Uncharacterized_protein_n=1_Tax=Spirosoma_linguale_(strain_ATCC_33905_/_DSM_74_/_LMG_10896)_RepID=D2QN80_SPILD
OG_10526	0.05	0	0	0.08	0	0	0	0	0	0	0	0	UniRef90_UPI00055CF2A2_pseudouridine_synthase_n=1_Tax=Maribacter_forsetii_RepID=UPI00055CF2A2
OG_10527	0	0	0	0.08	0	0	0	0	0	0	0	0	UniRef90_F4L782_Uncharacterized_protein_n=1_Tax=Haliscomenobacter_hydrossis_(strain_ATCC_27775_/_DSM_1100_/_LMG_10767_/_O)_RepID=F4L782_HALH1
OG_10528	0	0	0	0.48	0.13	0.29	0	0	0	0	0	0	UniRef90_UPI0003492F39_hypothetical_protein_n=1_Tax=Pleurocapsa_sp._PCC_7319_RepID=UPI0003492F39
OG_10529	0	0	0	0	0.26	0.15	0	0	0	0	0	0
OG_1053	0.9	0.73	2.02	1.92	1.81	0.87	0	0	0	0	0	0	UniRef90_UPI0006902356_hypothetical_protein_n=1_Tax=Maribacter_forsetii_RepID=UPI0006902356
OG_10530	0	0	0	0.16	0	0	0	0	0	0	0	0	UniRef90_UPI0003708C8A_hypothetical_protein_n=1_Tax=Lewinella_cohaerens_RepID=UPI0003708C8A
OG_10531	0	0	0	0	0	0	0	0	0	0	0	0	UniRef90_A0A069DDU3_Histone_acetyltransferase_n=1_Tax=Paenibacillus_sp._TCA20_RepID=A0A069DDU3_9BACL
OG_10532	0	0.15	0	0	0	0	0	0	0	0	0	0	UniRef90_M4QRY3_Uncharacterized_protein_n=1_Tax=Synechococcus_phage_S-SKS1_RepID=M4QRY3_9CAUD
OG_10533	0	0	0	0.08	0.13	0	0	0	0	0	0	0	UniRef90_E3SLI2_Glycosyltransferase_family_25_n=2_Tax=Synechococcus_phage_S-SSM7_RepID=E3SLI2_9CAUD
OG_10534	0	0	0	0	0.13	0.15	0	0	0	0	0	0	UniRef90_A0A0F9PH36_Uncharacterized_protein_n=1_Tax=marine_sediment_metagenome_RepID=A0A0F9PH36_9ZZZZ
OG_10535	0	0	0	0	0.13	0	0	0	0	0	0	0	UniRef90_H8XP82_Uncharacterized_protein_n=1_Tax=Flavobacterium_indicum_(strain_DSM_17447_/_CIP_109464_/_GPTSA100-9)_RepID=H8XP82_FLAIG
OG_10536	0	0	0	0	0	0	0	0	0	0	0	0
OG_10537	0	0	0.17	0.16	0	0.15	0	0	0	0	0	0	UniRef90_B8KQR4_Major_facilitator_superfamily_protein_n=1_Tax=Luminiphilus_syltensis_NOR5-1B_RepID=B8KQR4_9GAMM
OG_10538	0	0	0	0	0.39	0.15	0	0	0	0	0	0	UniRef90_A0A0F9KC14_Uncharacterized_protein_n=1_Tax=marine_sediment_metagenome_RepID=A0A0F9KC14_9ZZZZ
OG_10539	0.14	0	0	0	0.13	0	0	0	0	0	0	0	UniRef90_A0A075MQ59_Uncharacterized_protein_n=4_Tax=unclassified_Holosporaceae_RepID=A0A075MQ59_9RICK
OG_1054	0.2	1.51	1.18	1.93	2.79	1.46	0	0	0	0	0	0	UniRef90_A0A098S8H7_Uncharacterized_protein_n=1_Tax=Phaeodactylibacter_xiamenensis_RepID=A0A098S8H7_9SPHI
OG_10540	0	0	0	0	0.26	0	0	0	0	0	0	0	UniRef90_A0A0F9F7Y7_Uncharacterized_protein_(Fragment)_n=1_Tax=marine_sediment_metagenome_RepID=A0A0F9F7Y7_9ZZZZ
OG_10541	0	0	0	0	0.13	0	0	0	0	0	0	0	UniRef90_D6WDK7_Putative_uncharacterized_protein_n=1_Tax=Tribolium_castaneum_RepID=D6WDK7_TRICA
OG_10542	0	0	0	0	0	0	0	0	0	0	0	0
OG_10543	0	0	0	0.16	0.13	0.15	0	0	0	0	0	0	UniRef90_A0A098S4U0_Uncharacterized_protein_n=1_Tax=Phaeodactylibacter_xiamenensis_RepID=A0A098S4U0_9SPHI
OG_10544	0	0	0	0	0	0	0	0	0	0	0	0
OG_10545	0.05	0	0	0.08	0.13	0	0	0	0	0	0	0	UniRef90_UPI0006966A1C_hypothetical_protein_n=1_Tax=Phaeodactylibacter_xiamenensis_RepID=UPI0006966A1C
OG_10546	0	0.29	0	0.32	0	0	0	0	0	0	0	0	UniRef90_I3ZKD3_Uncharacterized_protein_n=1_Tax=Terriglobus_roseus_(strain_DSM_18391_/_NRRL_B-41598_/_KBS_63)_RepID=I3ZKD3_TERRK
OG_10547	0	0	0	0.16	0.13	0	0	0	0	0	0	0	UniRef90_A1ZW60_Uncharacterized_protein_n=1_Tax=Microscilla_marina_ATCC_23134_RepID=A1ZW60_9BACT
OG_10548	0	0	0	0.4	0.52	0	0	0	0	0	0	0	UniRef90_H0HR46_Phage_major_capsid_protein,_HK97_family_n=1_Tax=Mesorhizobium_alhagi_CCNWXJ12-2_RepID=H0HR46_9RHIZ
OG_10549	0.05	0	0	0.16	0.13	0	0	0	0	0	0	0	UniRef90_UPI000468E1AC_hypothetical_protein_n=1_Tax=Prevotella_falsenii_RepID=UPI000468E1AC
OG_1055	1.85	2.64	1.68	2.32	1.16	0.87	60.13	25.98	24.37	49.66	27.78	6.71	UniRef90_A0A098S8P2_30S_ribosomal_protein_S17_n=2_Tax=Bacteria_RepID=A0A098S8P2_9SPHI
OG_10550	0.05	0	0	0.08	1.16	0	0	0	0	0	0	0	UniRef90_A0A0F9KHS5_Uncharacterized_protein_n=1_Tax=marine_sediment_metagenome_RepID=A0A0F9KHS5_9ZZZZ
OG_10551	0	0	0	0	0.13	0	0	0	0	0	0	0	UniRef90_Q58M87_Glycosyltransferase_family_6_n=2_Tax=Prochlorococcus_phage_P-SSM2_RepID=Q58M87_BPPRM
OG_10552	0	0	0	0	0	0	0	0	0	0	0	0	UniRef90_UPI0004797E4B_hypothetical_protein_n=1_Tax=Fischerella_sp._PCC_9605_RepID=UPI0004797E4B
OG_10553	0	0	0	0	0	0.15	0	0	0	0	0	0	UniRef90_A0A010RU97_Acetyltransferase_n=1_Tax=Pseudomonas_fluorescens_HK44_RepID=A0A010RU97_PSEFL
OG_10554	0	0	0	0.08	0.13	0	0	0	0	0	0	0
OG_10555	0	0.44	0	0	0	0	0	0	0	0	0	0
OG_10556	0	0	0	0.24	0	0	0	0	0	0	0	0	UniRef90_A0A023BZ90_Uncharacterized_protein_n=1_Tax=Aquimarina_atlantica_RepID=A0A023BZ90_9FLAO
OG_10557	0	0	0	0	0.13	0	0	0	0	0	0	0
OG_10558	0	0	0	0	0	0.15	0	0	0	0	0	0
OG_10559	0	0	0	0	0	0	0	0	0	0	0	0
OG_1056	0.14	0.73	0.34	1.2	2.33	1.6	0	0	0	0	0	0	UniRef90_A0A098S8Q8_Uncharacterized_protein_n=3_Tax=Bacteria_RepID=A0A098S8Q8_9SPHI
OG_10560	0	0	0	0	0	0	0	0	0	0	0	0	UniRef90_M4QS48_Uncharacterized_protein_n=1_Tax=Synechococcus_phage_S-SKS1_RepID=M4QS48_9CAUD
OG_10561	0	0	0	0.4	0	0	0	0	0	0	0	0	UniRef90_A0A0D0EKJ7_Strain_DSM_12611_Contig12,_whole_genome_shotgun_sequence_n=1_Tax=Flavobacterium_hibernum_RepID=A0A0D0EKJ7_9FLAO
OG_10562	0	0.15	0	0.24	0	0.29	0	0	0	0	0	0
OG_10563	0	0	0	0	0.26	0	0	0	0	0	0	0	UniRef90_L8LQ74_Thymidylate_synthase,_flavin-dependent_n=1_Tax=Gloeocapsa_sp._PCC_73106_RepID=L8LQ74_9CHRO
OG_10564	0	0	0.5	0	0	0	0	0	0	0	0	0	UniRef90_A0A098S0U9_Glycoside_hydrolase_n=1_Tax=Phaeodactylibacter_xiamenensis_RepID=A0A098S0U9_9SPHI
OG_10565	0	0	0	0	0	0	0	0	0	0	0	0	UniRef90_A0A099XWF0_Conserved_hypothetical_membrane_protein_n=1_Tax=Polaribacter_sp._Hel1_33_49_RepID=A0A099XWF0_9FLAO
OG_10566	0	0	0.17	0.16	0.13	0.15	0	0	0	0	0	0	UniRef90_UPI00069EEF9C_hypothetical_protein_n=1_Tax=Roseivirga_sp._D-25_RepID=UPI00069EEF9C
OG_10567	0	0	0	0.24	0	0	0	0	0	0	0	0	UniRef90_UPI00037562E6_hypothetical_protein_n=1_Tax=Lewinella_cohaerens_RepID=UPI00037562E6
OG_10568	0	0	0	0	0	0	0	0	0	0	0	0	UniRef90_Q58MN6_Putative_uncharacterized_protein_n=2_Tax=Prochlorococcus_phage_P-SSM2_RepID=Q58MN6_BPPRM
OG_10569	0	0	0	0.16	0	0	0	0	0	0	0	0	UniRef90_UPI000378FE30_hypothetical_protein_n=1_Tax=Gracilimonas_tropica_RepID=UPI000378FE30
OG_1057	2.56	1.03	0.34	0.64	0.52	0	0	0	0	0	0	0	UniRef90_A0A098S3Z2_Formyltetrahydrofolate_deformylase_n=2_Tax=Bacteria_RepID=A0A098S3Z2_9SPHI
OG_10570	0	0	0	0.08	0.52	0.29	0	0	0	0	0	0
OG_10571	0.05	0.15	0	0.08	0.26	0.15	0	0	0	0	0	0
OG_10572	0	0	0	0	0	0	0	0	0	0	0	0	UniRef90_A3ZRL5_Uncharacterized_protein_n=1_Tax=Blastopirellula_marina_DSM_3645_RepID=A3ZRL5_9PLAN
OG_10573	0	0.29	0	0.56	0.65	0.15	0	0	0	0	0	0	UniRef90_UPI0005F24319_T9SS_C-terminal_target_domain-containing_protein_n=1_Tax=Hymenobacter_sp._AT01-02_RepID=UPI0005F24319
OG_10574	0	0	0	0	0	0	0	0	0	0	0	0	UniRef90_A0A0G3BNW7_Uncharacterized_protein_n=1_Tax=[Polyangium]_brachysporum_RepID=A0A0G3BNW7_9BURK
OG_10575	0	0	0	0	0	0	0	0	0	0	0	0	UniRef90_A0A0J1EL37_Uncharacterized_protein_n=1_Tax=Rhodopirellula_sp._K833_RepID=A0A0J1EL37_9PLAN
OG_10576	0.38	0.15	0	0.4	0.65	0.73	0	0	0	0	0	0
OG_10577	0.05	0	0	0	0	0	0	0	0	0	0	0	UniRef90_A6EP36_Uncharacterized_protein_n=1_Tax=unidentified_eubacterium_SCB49_RepID=A6EP36_9BACT
OG_10578	0	0	0	0	0	0	0	0	0	0	0	0	UniRef90_B6IRD5_Cation_efflux_family_protein_n=2_Tax=Rhodospirillum_centenum_RepID=B6IRD5_RHOCS
OG_10579	0	0	0	0	0.13	0	0	0	0	0	0	0	UniRef90_A0A098LMK1_Lactoylglutathione_lyase-like_protein_n=2_Tax=Bacteroidetes_RepID=A0A098LMK1_9BACT
OG_1058	0.14	0.44	0.34	0.72	0.39	0.29	0	0	0	0	0	0	UniRef90_F4L692_Orotate_phosphoribosyltransferase_n=1_Tax=Haliscomenobacter_hydrossis_(strain_ATCC_27775_/_DSM_1100_/_LMG_10767_/_O)_RepID=F4L692_HALH1
OG_10580	0	0	0	0.16	0	0.29	0	0	0	0	0	0	UniRef90_A0A0I9RN25_Uncharacterized_protein_n=2_Tax=Bacteroidaceae_RepID=A0A0I9RN25_BACFG
OG_10581	0	0.29	0	0	0	0	0	0	0	0	0	0	UniRef90_UPI00053E7113_hypothetical_protein_n=1_Tax=Lacinutrix_sp._PAMC_27137_RepID=UPI00053E7113
OG_10582	0	0	0	0.08	0	0	0	0	0	0	0	0	UniRef90_A0A0C1FDY4_Damage-inducible_protein_DinB_n=2_Tax=Pedobacter_kyungheensis_RepID=A0A0C1FDY4_9SPHI
OG_10583	0.05	0	0	0.16	0.26	0	0	0	0	0	0	0	UniRef90_A0A0A2E2T1_Uncharacterized_protein_n=4_Tax=Porphyromonas_RepID=A0A0A2E2T1_9PORP
OG_10584	0	0	0	0	0.13	0	0	0	0	0	0	0
OG_10585	0	0	0	0	0	0	0	0	0	0	0	0	UniRef90_I0KY10_Uncharacterized_protein_n=1_Tax=Micromonospora_lupini_str._Lupac_08_RepID=I0KY10_9ACTN
OG_10586	0	0	0	0	0	0	0	0	0	0	0	0
OG_10587	0	0.29	0	0.56	0.26	0.29	0	0	0	0	0	0	UniRef90_A0A098S734_Uncharacterized_protein_n=1_Tax=Phaeodactylibacter_xiamenensis_RepID=A0A098S734_9SPHI
OG_10588	0	0	0.17	0.16	0	0	0	0	0	0	0	0
OG_10589	0	0.15	0	0.24	0.13	0.15	0	0	0	0	0	0	UniRef90_E2NDT3_Uncharacterized_protein_n=1_Tax=Bacteroides_cellulosilyticus_DSM_14838_RepID=E2NDT3_9BACE
OG_1059	0.24	1.32	0.67	0.48	0.39	0.29	3.51	4.55	13.78	5.52	4.13	1.75	UniRef90_Q118A0_Ribosomal_RNA_small_subunit_methyltransferase_B_n=2_Tax=Trichodesmium_erythraeum_RepID=Q118A0_TRIEI
OG_10590	0	0	0	0.08	0	0	0	0	0	0	0	0	UniRef90_F0J727_3D-(3,5/4)-trihydroxycyclohexane-1,2-dione_hydrolase_IolD_n=1_Tax=Acidiphilium_multivorum_(strain_DSM_11245_/_JCM_8867_/_NBRC_100883_/_AIU301)_RepID=F0J727_ACIMA
OG_10591	0	0	0	0.08	0	0.29	0	0	0	0	0	0	UniRef90_L0EGR1_Xylan_alpha-1,2-glucuronidase_n=1_Tax=Thermobacillus_composti_(strain_DSM_18247_/_JCM_13945_/_KWC4)_RepID=L0EGR1_THECK
OG_10592	0	0	0	0	0.13	0	0	0	0	0	0	0	UniRef90_UPI0004175166_hypothetical_protein_n=1_Tax=Arenibacter_certesii_RepID=UPI0004175166
OG_10593	0	0.29	0	0	0.13	0	0	0	0	0	0	0	UniRef90_F9UHX1_Putative_uncharacterized_protein_n=1_Tax=Thiocapsa_marina_5811_RepID=F9UHX1_9GAMM
OG_10594	0	0	0.34	8.16	18.74	1.9	0	0	0	0	0	0	UniRef90_A0A0F7L9X7_Minor_capsid_protein_10_n=1_Tax=uncultured_marine_virus_RepID=A0A0F7L9X7_9VIRU
OG_10595	0.09	0.44	0	0.08	0	0	0	0	0	0	0	0	UniRef90_A0A017RV36_Purine_nucleoside_phosphorylase_DeoD-type_n=1_Tax=Fervidicella_metallireducens_AeB_RepID=A0A017RV36_9CLOT
OG_10596	0	0	0	0.16	0	0.15	0	0	0	0	0	0	UniRef90_UPI00064B2AE8_hypothetical_protein_n=1_Tax=Tenacibaculum_mesophilum_RepID=UPI00064B2AE8
OG_10597	0	0	0.17	0	0	0	0	0	0	0	0	0	UniRef90_A0A0A0EGW1_Heme_NO-binding_protein_n=1_Tax=Pseudooceanicola_atlanticus_RepID=A0A0A0EGW1_9RHOB
OG_10598	0	0	0.17	0.24	0.13	0	0	0	0	0	0	0	UniRef90_UPI0003704EC6_hypothetical_protein_n=1_Tax=Lewinella_persica_RepID=UPI0003704EC6
OG_10599	0.05	0	0	0	0	0	0	0	0	0	0	0	UniRef90_H6MRT5_Amidohydrolase_3_n=2_Tax=Gordonia_polyisoprenivorans_RepID=H6MRT5_GORPV
OG_106	16.67	12.44	9.71	2.34	4.67	2	1007.71	1093.44	842.13	581.4	538.8	179	UniRef90_Q115J8_TPR_repeat_n=1_Tax=Trichodesmium_erythraeum_(strain_IMS101)_RepID=Q115J8_TRIEI
OG_1060	0.19	0.59	0.5	1.92	2.2	1.02	0	0	0	0	0	0	UniRef90_UPI0004013866_T9SS_C-terminal_target_domain-containing_protein_n=1_Tax=Psychroserpens_burtonensis_RepID=UPI0004013866
OG_10600	0	0	0	0	0	0	0	0	0	0	0	0	UniRef90_A0A0C5WFI7_Uncharacterized_protein_n=1_Tax=Siansivirga_zeaxanthinifaciens_CC-SAMT-1_RepID=A0A0C5WFI7_9FLAO
OG_10601	0	0	0	0	0	0	0	0	0	0	0	0	UniRef90_A0A0H4PNV6_Putative_thiol-disulfide_oxidoreductase_ResA_n=1_Tax=Cyclobacterium_amurskyense_RepID=A0A0H4PNV6_9BACT
OG_10602	0	0	0	0.16	0.26	0	0	0	0	0	0	0	UniRef90_UPI00037EAE83_hypothetical_protein_n=1_Tax=Caldibacillus_debilis_RepID=UPI00037EAE83
OG_10603	0.09	0	0	0.08	0	0	0	0	0	0	0	0	UniRef90_UPI00035D3118_hypothetical_protein_n=1_Tax=Lewinella_cohaerens_RepID=UPI00035D3118
OG_10604	0	0	0	0	0	0	0	0	0	0	0	0	UniRef90_A0A0B4EE53_Tricarballylate_dehydrogenase_n=6_Tax=Leisingera_RepID=A0A0B4EE53_9RHOB
OG_10605	0	0	0	0	0	0	0	0	0	0	0	0	UniRef90_A0A077KZH0_Putative_endonuclease_V_n=4_Tax=Acinetobacter_RepID=A0A077KZH0_ACIGI
OG_10606	0	0	0	0	0	0	0	0	0	0	0	0
OG_10607	0	0	0	0	0	0	0	0	0	0	0	0	UniRef90_A0A086AY96_Uncharacterized_protein_n=1_Tax=Chryseobacterium_sp._JM1_RepID=A0A086AY96_9FLAO
OG_10608	0	0	0	0	0.26	0	0	0	0	0	0	0	UniRef90_UPI00067FDBEE_hypothetical_protein_n=1_Tax=Achromobacter_piechaudii_RepID=UPI00067FDBEE
OG_10609	0	0	0	0	0	0.15	0	0	0	0	0	0
OG_1061	0.09	0.59	1.18	0.8	1.03	0.44	5.97	55.63	30.08	49.02	29.2	10.5	UniRef90_A0A098S9Y8_Glycine_cleavage_system_H_protein_n=1_Tax=Phaeodactylibacter_xiamenensis_RepID=A0A098S9Y8_9SPHI
OG_10610	0	0	0	0	0	0	0	0	0	0	0	0
OG_10611	0	0	0	0	0	0	0	0	0	0	0	0
OG_10612	0	0	0	0.16	0	0.15	0	0	0	0	0	0	UniRef90_A0A0C1D5L5_Uncharacterized_protein_n=1_Tax=Pedobacter_kyungheensis_RepID=A0A0C1D5L5_9SPHI
OG_10613	0	0	0	0	0	0	0	0	0	0	0	0	UniRef90_UPI000482D6A0_T9SS_C-terminal_target_domain-containing_protein_n=1_Tax=Crocinitomix_catalasitica_RepID=UPI000482D6A0
OG_10614	0	0.15	0	0	0	0	0	0	0	0	0	0	UniRef90_A0A098S7J2_Transcriptional_regulator_n=1_Tax=Phaeodactylibacter_xiamenensis_RepID=A0A098S7J2_9SPHI
OG_10615	0	0	0	0	0	0	0	0	0	0	0	0	UniRef90_U9VRL4_Isoprenylcysteine_carboxyl_methyltransferase_n=2_Tax=Leptolyngbya_sp._Heron_Island_J_RepID=U9VRL4_9CYAN
OG_10616	0.05	0.15	0	0.24	0.13	0	0	0	0	0	0	0	UniRef90_A0A098RYU5_Dihydrofolate_reductase_n=1_Tax=Phaeodactylibacter_xiamenensis_RepID=A0A098RYU5_9SPHI
OG_10617	0	0	0	0	0	0	0	0	0	0	0	0	UniRef90_A0A0C1XHU7_Uncharacterized_protein_n=1_Tax=Aphanocapsa_montana_BDHKU210001_RepID=A0A0C1XHU7_9CHRO
OG_10618	0	0	0	0.08	0.13	0	0	0	0	0	0	0
OG_10619	0	0	0	0	0	0.15	0	0	0	0	0	0	UniRef90_UPI00037F3124_hypothetical_protein_n=1_Tax=Lewinella_cohaerens_RepID=UPI00037F3124
OG_1062	0.28	0.59	0.67	1.52	1.16	0.87	0	0	0	0	0	0	UniRef90_A0A0E3ZI13_Uncharacterized_protein_n=1_Tax=Pontibacter_korlensis_RepID=A0A0E3ZI13_9BACT
OG_10620	0	0	0	0	0	0	0	0	0	0	0	0	UniRef90_UPI0006971949_hypothetical_protein_n=1_Tax=Aureispira_sp._CCB-QB1_RepID=UPI0006971949
OG_10621	0	0	0	0	0	0	0	0	0	0	0	0	UniRef90_A0A0F9SK18_Uncharacterized_protein_n=1_Tax=marine_sediment_metagenome_RepID=A0A0F9SK18_9ZZZZ
OG_10622	0	0	0	0	0	0	0	0	0	0	0	0	UniRef90_UPI0003709B93_hypothetical_protein_n=1_Tax=Bacillus_sp._37MA_RepID=UPI0003709B93
OG_10623	0	0	0	0.08	0.26	0	0	0	0	0	0	0
OG_10624	0	0	0	0	0	0	0	0	0	0	0	0
OG_10625	0	0	0	0	0	0	0	0	0	0	0	0	UniRef90_B7QPL8_FAD-binding_9,_siderophore-interacting_n=4_Tax=Rhodobacteraceae_RepID=B7QPL8_9RHOB
OG_10626	0	0	0	0.24	0.26	0.29	0	0	0	0	0	0	UniRef90_I2EY85_Tetratricopeptide_TPR_1_repeat-containing_protein_n=1_Tax=Emticicia_oligotrophica_(strain_DSM_17448_/_GPTSA100-15)_RepID=I2EY85_EMTOG
OG_10627	0	0.15	0.17	0.16	0	0.15	0	0	0	0	0	0
OG_10628	0.05	0	0	0	0	0	0	0	0	0	0	0	UniRef90_A0A062XS00_Uncharacterized_protein_n=1_Tax=Thermoanaerobaculum_aquaticum_RepID=A0A062XS00_9BACT
OG_10629	0	0	0	0.08	0	0	0	0	0	0	0	0	UniRef90_A0A098LHX3_Peptide_deformylase_n=1_Tax=Sporocytophaga_myxococcoides_RepID=A0A098LHX3_9BACT
OG_1063	0.81	3.38	1.18	0.88	0.65	1.02	0	0	0	0	0	0	UniRef90_A0A098RYQ6_Transcription_elongation_factor_GreA_n=2_Tax=Bacteria_RepID=A0A098RYQ6_9SPHI
OG_10630	0	0	0	0	0	0	0	0	0	0	0	0	UniRef90_UPI0006198A9F_hypothetical_protein_n=2_Tax=Hymenobacter_sp._MIMtkLc17_RepID=UPI0006198A9F
OG_10631	1.18	0	0	0.16	0.26	0	0	0	0	0	0	0	UniRef90_A0A0B4BQ84_Membrane_protein_n=1_Tax=Tateyamaria_sp._ANG-S1_RepID=A0A0B4BQ84_9RHOB
OG_10632	0.09	0	0.84	0	0	0	0	0	0	0	0	0	UniRef90_F4AQY3_Propeptide_PepSY_amd_peptidase_M4_n=3_Tax=Alteromonadaceae_RepID=F4AQY3_GLAS4
OG_10633	0	0	0	0	0	0	0	0	0	0	0	0	UniRef90_A0A0F2RFA5_Uncharacterized_protein_n=1_Tax=Hyphomonas_sp._BRH_c22_RepID=A0A0F2RFA5_9RHOB
OG_10634	0	0	0	0	0	0	0	0	0	0	0	0	UniRef90_UPI00069ED763_3-hydroxybutyryl-CoA_dehydrogenase_n=1_Tax=Roseivirga_sp._D-25_RepID=UPI00069ED763
OG_10635	0.05	0	0	0	0	0.29	0	0	0	0	0	0	UniRef90_UPI00037AABFF_hypothetical_protein_n=1_Tax=Lewinella_cohaerens_RepID=UPI00037AABFF
OG_10636	0.05	0	0.67	0	0	0	0	0	0	0	0	0	UniRef90_M7X2K0_Uncharacterized_protein_n=1_Tax=Mariniradius_saccharolyticus_AK6_RepID=M7X2K0_9BACT
OG_10637	0.05	0.15	0.17	0.08	0	0	0	0	0	0	0	0	UniRef90_UPI000698E35D_hypothetical_protein_n=1_Tax=Aureispira_sp._CCB-QB1_RepID=UPI000698E35D
OG_10638	0	0	0.17	0	0	0	0	0	0	0	0	0	UniRef90_A4ADV8_Fumarase,_class_I,_homodimeric_n=3_Tax=unclassified_Gammaproteobacteria_RepID=A4ADV8_9GAMM
OG_10639	0	0	0	0	0.26	0	0	0	0	0	0	0	UniRef90_E4TRQ6_Uncharacterized_protein_n=1_Tax=Marivirga_tractuosa_(strain_ATCC_23168_/_DSM_4126_/_NBRC_15989_/_NCIMB_1408_/_VKM_B-1430_/_H-43)_RepID=E4TRQ6_MARTH
OG_1064	0.62	0.59	1.85	3.44	2.84	3.35	0	0	0	0	0	0	UniRef90_UPI000698C7B3_hypothetical_protein_n=1_Tax=Aureispira_sp._CCB-QB1_RepID=UPI000698C7B3
OG_10640	0	0	0	0	0	0	0	0	0	0	0	0
OG_10641	0	0	0	0	0	0	0	0	0	0	0	0	UniRef90_A0A076I0Y3_Uncharacterized_protein_n=1_Tax=Hymenobacter_sp._APR13_RepID=A0A076I0Y3_9BACT
OG_10642	0.09	0	0.17	0	0.13	0	0	0	0	0	0	0	UniRef90_UPI00037FE735_hypothetical_protein_n=1_Tax=Lewinella_persica_RepID=UPI00037FE735
OG_10643	0	0.15	0	0	0	0	0	0	0	0	0	0	UniRef90_UPI00036786BB_hypothetical_protein_n=1_Tax=Flexithrix_dorotheae_RepID=UPI00036786BB
OG_10644	0.05	0	0	0	0.13	0	0	0	0	0	0	0	UniRef90_UPI0003AD00DE_hypothetical_protein_n=1_Tax=Actinomadura_madurae_RepID=UPI0003AD00DE
OG_10645	0	0	0	0	0	0	0	0	0	0	0	0	UniRef90_UPI00036A4F5A_hypothetical_protein_n=1_Tax=Lewinella_persica_RepID=UPI00036A4F5A
OG_10646	0.38	0.59	1.68	0.8	0.9	0.15	0	0	0	0	0	0
OG_10647	0.05	0	0	0.08	0	0	0	0	0	0	0	0	UniRef90_A0A059EEU9_Uncharacterized_protein_n=2_Tax=Hyphomonas_sp._L-53-1-40_RepID=A0A059EEU9_9RHOB
OG_10648	0.09	0	0	0	0	0	0	0	0	0	0	0	UniRef90_A0A0G3XKP7_Thiol:disulfide_interchange_protein_n=2_Tax=Croceicoccus_naphthovorans_RepID=A0A0G3XKP7_9SPHN
OG_10649	0	0	0	0	0.13	0	0	0	0	0	0	0	UniRef90_L0G1L8_Transposase_family_protein_n=1_Tax=Echinicola_vietnamensis_(strain_DSM_17526_/_LMG_23754_/_KMM_6221)_RepID=L0G1L8_ECHVK
OG_1065	0.47	1.03	1.34	1.36	0.78	1.02	0	0	0	0	0	0	UniRef90_UPI0005C73A17_hypothetical_protein_n=1_Tax=Aphanocapsa_montana_RepID=UPI0005C73A17
OG_10650	0	0	0	0	0	0	0	0	0	0	0	0	UniRef90_UPI000373CA6B_hypothetical_protein_n=1_Tax=Lewinella_cohaerens_RepID=UPI000373CA6B
OG_10651	0	0	0	0	0.26	0.15	0	0	0	0	0	0	UniRef90_K1M4N5_Uncharacterized_protein_n=1_Tax=Cecembia_lonarensis_LW9_RepID=K1M4N5_9BACT
OG_10652	0	0	0	0	0	0.15	0	0	0	0	0	0	UniRef90_UPI0005C4462C_hypothetical_protein_n=1_Tax=Lewinella_persica_RepID=UPI0005C4462C
OG_10653	0	0	0	0	0	0	0	0	0	0	0	0	UniRef90_UPI0003773267_hypothetical_protein_n=1_Tax=Lewinella_persica_RepID=UPI0003773267
OG_10654	0	0	0	0	0	0	0	0	0	0	0	0
OG_10655	0	0	0	0	0	0	0	0	0	0	0	0	UniRef90_B8KI11_Regulatory_protein_RecX_n=1_Tax=gamma_proteobacterium_NOR5-3_RepID=B8KI11_9GAMM
OG_10656	0	0	0	0	0	0	0	0	0	0	0	0	UniRef90_UPI000556364E_antibiotic_biosynthesis_monooxygenase_n=1_Tax=Hippea_jasoniae_RepID=UPI000556364E
OG_10657	0	0	0	0.08	0	0	0	0	0	0	0	0	UniRef90_A0A0A2H414_Uncharacterized_protein_n=1_Tax=Elizabethkingia_miricola_RepID=A0A0A2H414_ELIMR
OG_10658	0.09	0	0	0	0	0	0	0	0	0	0	0	UniRef90_A0A086E247_Uncharacterized_protein_n=1_Tax=Cryobacterium_sp._MLB-32_RepID=A0A086E247_9MICO
OG_10659	0.09	0.29	0.17	0.16	0	0.29	0	0	0	0	0	0	UniRef90_A4A8D2_Integral_membrane_protein,_interacts_with_FtsH_n=3_Tax=unclassified_Gammaproteobacteria_RepID=A4A8D2_9GAMM
OG_1066	0	0.29	0.34	1.28	1.68	0.58	0	0	0	0	0	0	UniRef90_A0A098S6Z6_Uncharacterized_protein_n=2_Tax=Bacteria_RepID=A0A098S6Z6_9SPHI
OG_10660	0	0	0	0	0	0	0	0	0	0	0	0	UniRef90_A3JYU0_Uncharacterized_protein_n=1_Tax=Sagittula_stellata_E-37_RepID=A3JYU0_9RHOB
OG_10661	0	2.64	0	1.68	0	0.15	0	0	0	0	0	0	UniRef90_D6WQZ0_Putative_uncharacterized_protein_n=1_Tax=Tribolium_castaneum_RepID=D6WQZ0_TRICA
OG_10662	0.14	0.15	0.17	0	0	0	0	0	0	0	0	0	UniRef90_UPI0003771CC7_hypothetical_protein_n=1_Tax=Lewinella_cohaerens_RepID=UPI0003771CC7
OG_10663	0	0	0	0	0.13	0	0	0	0	0	0	0	UniRef90_A0A060DVD2_Uncharacterized_protein_n=2_Tax=Azospirillum_brasilense_RepID=A0A060DVD2_AZOBR
OG_10664	0.09	0	0.17	0	0	0	0	0	0	0	0	0	UniRef90_A4A5J6_Type_II_secretion_system_protein_C_(GspC)_n=2_Tax=Congregibacter_RepID=A4A5J6_9GAMM
OG_10665	0	0	0	0	0	0	0	0	0	0	0	0
OG_10666	0	0	0	0.08	0	0	0	0	0	0	0	0	UniRef90_UPI00054D0C03_hypothetical_protein_n=1_Tax=Gillisia_sp._Hel_I_29_RepID=UPI00054D0C03
OG_10667	0	0	0	0	0	0	0	0	0	0	0	0
OG_10668	0	0	0	0.72	0.13	0.29	0	0	0	0	0	0	UniRef90_G0LBU9_Fumarylacetoacetate_hydrolase_n=1_Tax=Zobellia_galactanivorans_(strain_DSM_12802_/_CIP_106680_/_NCIMB_13871_/_Dsij)_RepID=G0LBU9_ZOBGA
OG_10669	2.23	0	2.35	0	0	0	0	0	0	0	0	0	UniRef90_F5XVJ1_Uncharacterized_protein_n=2_Tax=Ramlibacter_RepID=F5XVJ1_RAMTT
OG_1067	0.19	2.5	0.5	1.68	1.42	0.87	0	0	0	0	0	0	UniRef90_A0A098S410_Cell_division_protein_ftsA_n=1_Tax=Phaeodactylibacter_xiamenensis_RepID=A0A098S410_9SPHI
OG_10670	0	0	0	0.24	0	0.15	0	0	0	0	0	0	UniRef90_A4CPV8_Putative_helicase_n=1_Tax=Robiginitalea_biformata_(strain_ATCC_BAA-864_/_HTCC2501_/_KCTC_12146)_RepID=A4CPV8_ROBBH
OG_10671	0.05	0	0	0	0	0	0	0	0	0	0	0
OG_10672	0	0	0	0.08	0	0	0	0	0	0	0	0	UniRef90_UPI0004859FC9_hypothetical_protein_n=1_Tax=Olleya_marilimosa_RepID=UPI0004859FC9
OG_10673	0	0.29	0	0	0	0	0	0	0	0	0	0	UniRef90_UPI0006295651_DNA_repair_protein_n=1_Tax=Kordia_sp._MCCC_1A00726_RepID=UPI0006295651
OG_10674	0.05	0	0	0.16	0	0	0	0	0	0	0	0	UniRef90_A0A0J1G5C8_Beta-lactamase_n=1_Tax=Burkholderia_glathei_PML1(12)_RepID=A0A0J1G5C8_9BURK
OG_10675	0	0	0	0.08	0	0	0	0	0	0	0	0	UniRef90_A0A098S257_Uncharacterized_protein_n=1_Tax=Phaeodactylibacter_xiamenensis_RepID=A0A098S257_9SPHI
OG_10676	0	0	0	0	0	0	0	0	0	0	0	0	UniRef90_UPI00031C8F26_hypothetical_protein_n=1_Tax=Diplosphaera_colitermitum_RepID=UPI00031C8F26
OG_10677	0	0	0	0	0	0	0	0	0	0	0	0
OG_10678	0	0	0.17	0	0	0	0	0	0	0	0	0	UniRef90_UPI0003F60B38_hypothetical_protein_n=1_Tax=Salinimicrobium_terrae_RepID=UPI0003F60B38
OG_10679	0	0.15	0	0	0.13	0	0	0	0	0	0	0	UniRef90_UPI00034575B9_T9SS_C-terminal_target_domain-containing_protein_n=1_Tax=Nafulsella_turpanensis_RepID=UPI00034575B9
OG_1068	2.75	4.26	7.06	3.44	5.17	2.92	0	0	0	0	0	0	UniRef90_UPI00037A1C6C_hypothetical_protein_n=1_Tax=Lewinella_cohaerens_RepID=UPI00037A1C6C
OG_10680	0.05	0	0	0	0	0	0	0	0	0	0	0	UniRef90_UPI00035D1EF3_hypothetical_protein_n=1_Tax=Lewinella_cohaerens_RepID=UPI00035D1EF3
OG_10681	0	0	0	0	0	0	0	0	0	0	0	0	UniRef90_G6CP10_Putative_dynein_heavy_chain_n=2_Tax=Obtectomera_RepID=G6CP10_DANPL
OG_10682	0	0	0	0.08	0	0.15	0	0	0	0	0	0	UniRef90_B0WM18_Dynein_heavy_chain_n=7_Tax=Culicoidea_RepID=B0WM18_CULQU
OG_10683	0	0	0	0	0	0	3.93	0.73	0	1.12	1.42	0.29
OG_10684	0	0	0	0	0	0	0	0	0	0	0	0
OG_10685	0	0	0	0	0.13	0.15	0	0	0	0	0	0	UniRef90_A0A023BT35_Cupin_n=3_Tax=Aquimarina_RepID=A0A023BT35_9FLAO
OG_10686	0.05	0	0	0	0	0	0	0	0	0	0	0	UniRef90_UPI0006624EE8_hypothetical_protein_n=1_Tax=Scytonema_tolypothrichoides_RepID=UPI0006624EE8
OG_10687	0	0	0.17	0.08	0	0	0	0	0	0	0	0	UniRef90_G0L2V6_Hypothetical_periplasmic_protein_n=1_Tax=Zobellia_galactanivorans_(strain_DSM_12802_/_CIP_106680_/_NCIMB_13871_/_Dsij)_RepID=G0L2V6_ZOBGA
OG_10688	0.14	0	0.34	0	0	0	0	0	0	0	0	0	UniRef90_A0A0F2NWF9_Uncharacterized_protein_n=1_Tax=Flavobacteriales_bacterium_BRH_c54_RepID=A0A0F2NWF9_9FLAO
OG_10689	0	0.15	0	0.16	0	0	0	0	0	0	0	0	UniRef90_A0A0C9R7R7_Sertad4_3_protein_n=2_Tax=Fopius_arisanus_RepID=A0A0C9R7R7_9HYME
OG_1069	0.24	0.59	0.17	0.08	0.52	0.44	0.76	2.79	0.17	8.16	3.1	2.04	UniRef90_E0UAI3_Site-specific_DNA-methyltransferase_(Adenine-specific)_n=1_Tax=Cyanothece_sp._(strain_PCC_7822)_RepID=E0UAI3_CYAP2
OG_10690	0	0	0	0	0.13	0	0	0	0	0	0	0	UniRef90_A2A0G4_Intein_C-terminal_splicing_region_domain_protein_n=1_Tax=Microscilla_marina_ATCC_23134_RepID=A2A0G4_9BACT
OG_10691	0	0	0	0	0	0	0	0	0	0	0	0	UniRef90_UPI00047C5FF9_membrane_protein_n=1_Tax=Maribacter_sp._Hel_I_7_RepID=UPI00047C5FF9
OG_10692	0	0	0	0	0	0	0	0	0	0	0	0	UniRef90_K4KJF8_Major_facilitator_transporter_n=1_Tax=Simiduia_agarivorans_(strain_DSM_21679_/_JCM_13881_/_BCRC_17597_/_SA1)_RepID=K4KJF8_SIMAS
OG_10693	0	0	0	0	0	0	0	0	0	0	0	0
OG_10694	0	0	0	0.4	0.26	0.15	0	0	0	0	0	0	UniRef90_UPI00056A10F8_formyltetrahydrofolate_deformylase,_partial_n=1_Tax=Photobacterium_sanctipauli_RepID=UPI00056A10F8
OG_10695	0	0	0	0	0	0.29	0	0	0	0	0	0
OG_10696	0	0	0	0	0	0	0	0	0	0	0	0	UniRef90_A0A0C1QLS6_Molybdenum_cofactor_biosysynthesis_protein_n=1_Tax=Tolypothrix_bouteillei_VB521301_RepID=A0A0C1QLS6_9CYAN
OG_10697	0	0	0	0	0.13	0	0	0	0	0	0	0	UniRef90_R9S7T0_Uncharacterized_protein_n=2_Tax=Prochlorococcus_phage_P-SSM2_RepID=R9S7T0_BPPRM
OG_10698	0	0.15	0	0	0	0	0	0	0	0	0	0	UniRef90_A9E5X1_Uncharacterized_protein_n=1_Tax=Oceanibulbus_indolifex_HEL-45_RepID=A9E5X1_9RHOB
OG_10699	0	0	0	0	0.13	0.15	0	0	0	0	0	0	UniRef90_A0A023BUF2_Uncharacterized_protein_n=2_Tax=Aquimarina_RepID=A0A023BUF2_9FLAO
OG_107	0.85	1.47	4.03	4.24	4.01	2.04	17.39	17.91	15.29	10	16.15	5.39	UniRef90_A0A098S2I1_Uncharacterized_protein_n=1_Tax=Phaeodactylibacter_xiamenensis_RepID=A0A098S2I1_9SPHI
OG_1070	0.14	0.15	0.17	1.28	0.52	0.29	0	0	0	0	0	0	UniRef90_UPI00037D0C49_hypothetical_protein_n=1_Tax=Lewinella_cohaerens_RepID=UPI00037D0C49
OG_10700	0	0	0	0.16	0	0	0	0	0	0	0	0	UniRef90_H3NX26_Uncharacterized_protein_n=2_Tax=gamma_proteobacterium_HIMB55_RepID=H3NX26_9GAMM
OG_10701	0	0	0	0	0	0	0	0	0	0	0	0	UniRef90_V4AX35_Uncharacterized_protein_n=1_Tax=Lottia_gigantea_RepID=V4AX35_LOTGI
OG_10702	0	0	0	0	0	0.15	0	0	0	0	0	0	UniRef90_G0IVK3_Uncharacterized_protein_n=1_Tax=Cyclobacterium_marinum_(strain_ATCC_25205_/_DSM_745)_RepID=G0IVK3_CYCMS
OG_10703	0	0	0	0	0	0	0	0	0	0	0	0	UniRef90_A0A0B3RPB6_Ribose_1,5-bisphosphate_phosphokinase_PhnN_n=1_Tax=Ponticoccus_sp._UMTAT08_RepID=A0A0B3RPB6_9RHOB
OG_10704	0	0	0.17	0	0	0	0	0	0	0	0	0	UniRef90_W8KNC8_NAD(P)H_dehydrogenase_(quinone)_n=1_Tax=Halorhodospira_halochloris_str._A_RepID=W8KNC8_HALHR
OG_10705	0	0	0	0	0	0	0	0	0	0	0	0	UniRef90_A0A059FVH1_Major_facilitator_transporter_n=1_Tax=Hyphomonas_johnsonii_MHS-2_RepID=A0A059FVH1_9RHOB
OG_10706	0	0	0.17	0	0	0	0	0	0	0	0	0	UniRef90_A0A0F2RBF8_Esterase_n=3_Tax=Hyphomonas_RepID=A0A0F2RBF8_9RHOB
OG_10707	0	0	0	0	0	0	0	0	0	0	0	0	UniRef90_A0A095DBL6_HTH-type_transcriptional_regulator_RutR_n=1_Tax=Sphingopyxis_sp._LC81_RepID=A0A095DBL6_9SPHN
OG_10708	0	0	0	0	0	0	0	0	0	0	0	0	UniRef90_A0A0J9E4T4_Putative_phosphonate_metabolism_protein_PhnG_n=1_Tax=alpha_proteobacterium_symbiont_of_Oscarella_lobularis_RepID=A0A0J9E4T4_9PROT
OG_10709	0	0	0	0	0	0	0	0	0	0	0	0	UniRef90_UPI0003B67456_MucR_family_transcriptional_regulator_n=2_Tax=Fodinicurvata_RepID=UPI0003B67456
OG_1071	0.19	0.88	0.67	2	3.88	0.73	0	0	0	0	0	0	UniRef90_A0A098SAT7_Polysaccharide_biosynthesis_protein_GumN_n=1_Tax=Phaeodactylibacter_xiamenensis_RepID=A0A098SAT7_9SPHI
OG_10710	0	0	0	0.16	0	0	0	0	0	0	0	0	UniRef90_A0A059DXI5_Uncharacterized_protein_n=1_Tax=Hyphomonas_atlantica_RepID=A0A059DXI5_9RHOB
OG_10711	0	0	0	0	0.13	0	0	0	0	0	0	0	UniRef90_A0A086XY92_Transmembrane_exosortase_n=2_Tax=Haematobacter_RepID=A0A086XY92_9RHOB
OG_10712	0	0	0	0.16	0.26	0	0	0	0	0	0	0	UniRef90_A0A059FRP6_Uncharacterized_protein_n=1_Tax=Hyphomonas_johnsonii_MHS-2_RepID=A0A059FRP6_9RHOB
OG_10713	0	0.29	0	0.08	0	0	0	0	0	0	0	0	UniRef90_UPI0006737543_hypothetical_protein_n=1_Tax=Wenzhouxiangella_marina_RepID=UPI0006737543
OG_10714	0	0	0	0	0	0	0	0	0	0	0	0	UniRef90_D3SEM3_Uncharacterized_protein_n=7_Tax=Ectothiorhodospiraceae_RepID=D3SEM3_THISK
OG_10715	0	0.15	0	0	0	0	0	0	0	0	0	0	UniRef90_A0A069E0J9_Putative_xanthine_dehydrogenase_accessory_factor_n=2_Tax=Hyphomonas_adhaerens_RepID=A0A069E0J9_9RHOB
OG_10716	0	0	0	0	0	0	0	0	0	0	0	0	UniRef90_A0A081PIE5_Uncharacterized_protein_n=1_Tax=Pedobacter_antarcticus_4BY_RepID=A0A081PIE5_9SPHI
OG_10717	0	0	0	0.08	0	0	0	0	0	0	0	0	UniRef90_A0A059DT42_Uncharacterized_protein_n=1_Tax=Hyphomonas_sp._CY54-11-8_RepID=A0A059DT42_9RHOB
OG_10718	0.05	0	0	0	0	0	0	0	0	0	0	0	UniRef90_C8RX69_Flagellar_basal_body_rod_protein_FlgB_n=1_Tax=Rhodobacter_sp._SW2_RepID=C8RX69_9RHOB
OG_10719	0	0	0	0	0	0	0	0	0	0	0	0	UniRef90_A0A0D6B7E1_Flagellar_hook-basal_body_protein_FliE_n=2_Tax=Rhodovulum_sulfidophilum_RepID=A0A0D6B7E1_RHOSU
OG_1072	0.24	0.59	1.18	2.56	1.29	1.02	0	0	0	0	0	0	UniRef90_A0A098S358_Uncharacterized_protein_n=1_Tax=Phaeodactylibacter_xiamenensis_RepID=A0A098S358_9SPHI
OG_10720	0	0	0	0	0	0	0	0	0	0	0	0	UniRef90_A0A059GAB9_Alkyl_sulfatase_n=1_Tax=Hyphomonas_oceanitis_SCH89_RepID=A0A059GAB9_9RHOB
OG_10721	0.05	0	0	0	0	0	0	0	0	0	0	0	UniRef90_A0A059E1M1_Uncharacterized_protein_n=2_Tax=Hyphomonas_RepID=A0A059E1M1_9RHOB
OG_10722	0	0	0	0	0	0	0	0	0	0	0	0	UniRef90_G2KLP5_Bacterial_type_II_secretion_system_F_domain_protein_n=2_Tax=Micavibrio_aeruginosavorus_RepID=G2KLP5_MICAA
OG_10723	0	0	0.17	0	0	0	0	0	0	0	0	0	UniRef90_A4ACC6_Putative_lactoylglutathione_lyase_n=1_Tax=Congregibacter_litoralis_KT71_RepID=A4ACC6_9GAMM
OG_10724	0.14	0	0	0	0	0	0	0	0	0	0	0	UniRef90_UPI0003A26BF2_twin_arginine-targeting_protein_translocase_n=1_Tax=Henriciella_marina_RepID=UPI0003A26BF2
OG_10725	0	0	0	0	0	0	0	0	0	0	0	0	UniRef90_UPI0005926003_hypothetical_protein_n=1_Tax=gamma_proteobacterium_NOR5-3_RepID=UPI0005926003
OG_10726	0	0	0.17	0.08	0.26	0	0	0	0	0	0	0	UniRef90_UPI00035F6E4C_hypothetical_protein_n=1_Tax=Henriciella_marina_RepID=UPI00035F6E4C
OG_10727	0	0	0	0	0	0	0	0	0	0	0	0	UniRef90_A0Z336_Uncharacterized_protein_n=1_Tax=marine_gamma_proteobacterium_HTCC2080_RepID=A0Z336_9GAMM
OG_10728	0	0	0	0	0	0	0	0	0	0	0	0	UniRef90_A0A0B3RS41_Taurine_catabolism_dioxygenase_TauD/TfdA_n=1_Tax=Ponticoccus_sp._UMTAT08_RepID=A0A0B3RS41_9RHOB
OG_10729	0	0	0	0	0	0	0	0	0	0	0	0	UniRef90_A0A062UJ60_Uncharacterized_protein_n=2_Tax=Hyphomonas_RepID=A0A062UJ60_9RHOB
OG_1073	0	0.44	0	0.4	0.26	0.58	5.26	11.16	7.39	5.52	4.52	1.9	UniRef90_A0A098S7Q5_Uncharacterized_protein_n=1_Tax=Phaeodactylibacter_xiamenensis_RepID=A0A098S7Q5_9SPHI
OG_10730	0	0	0	0	0	0	0	0	0	0	0	0	UniRef90_A0A0J9E9A4_Succinate_dehydrogenase_hydrophobic_membrane_anchor_protein_n=1_Tax=alpha_proteobacterium_symbiont_of_Oscarella_lobularis_RepID=A0A0J9E9A4_9PROT
OG_10731	0	0	0	0	0.26	0	0	0	0	0	0	0	UniRef90_A4A7A0_Purine-cytosine_permease_n=1_Tax=Congregibacter_litoralis_KT71_RepID=A4A7A0_9GAMM
OG_10732	0.05	0	0	0	0	0	0	0	0	0	0	0	UniRef90_A8TQQ7_Uncharacterized_protein_n=1_Tax=alpha_proteobacterium_BAL199_RepID=A8TQQ7_9PROT
OG_10733	0	0	0	0	0	0	0	0	0	0	0	0	UniRef90_A0A0C1VH78_SAM-dependent_methyltransferase_n=2_Tax=Oscillatoriophycideae_RepID=A0A0C1VH78_9CYAN
OG_10734	0	0	0	0	0	0	0	0	0	0	0	0	UniRef90_A0A095CPQ2_Acyl-CoA_transferase_n=7_Tax=Alphaproteobacteria_RepID=A0A095CPQ2_9RHOB
OG_10735	0	0	0	0	0	0	0	0	0	0	0	0	UniRef90_A0A073IZR8_Oxidoreductase_n=3_Tax=Sulfitobacter_RepID=A0A073IZR8_9RHOB
OG_10736	0	0	0.17	0	0	0	0	0	0	0	0	0	UniRef90_A0A069E151_Putative_iron_ABC_transporter_periplasmic_iron-binding_protein_n=1_Tax=Hyphomonas_adhaerens_MHS-3_RepID=A0A069E151_9RHOB
OG_10737	0	0	0	0	0	0	0	0	0	0	0	0	UniRef90_A0A062UJB9_Uncharacterized_protein_n=2_Tax=Hyphomonas_RepID=A0A062UJB9_9RHOB
OG_10738	0.05	0	0	0	0	0	0	0	0	0	0	0	UniRef90_A0A095XY65_TonB-dependent_receptor_n=1_Tax=Pseudohaliea_rubra_DSM_19751_RepID=A0A095XY65_9GAMM
OG_10739	0.05	0	0	0	0.13	0	0	0	0	0	0	0	UniRef90_A4A3M9_Cytochrome_c-type_biogenesis_protein_CcmE_n=1_Tax=Congregibacter_litoralis_KT71_RepID=A4A3M9_9GAMM
OG_1074	0.24	0.29	0.17	1.04	0.65	0.58	0	0	0	0	0	0	UniRef90_A0A098RZB4_Uncharacterized_protein_n=1_Tax=Phaeodactylibacter_xiamenensis_RepID=A0A098RZB4_9SPHI
OG_10740	0	0	0	0	0	0	0	0	0	0	0	0	UniRef90_A0A059E0C8_Uncharacterized_protein_n=4_Tax=Hyphomonas_RepID=A0A059E0C8_9RHOB
OG_10741	0	0	0	0	0	0	0	0	0	0	0	0	UniRef90_A3VYP2_Uncharacterized_protein_n=2_Tax=Roseovarius_RepID=A3VYP2_9RHOB
OG_10742	0	0	0	0	0	0	0	0	0	0	0	0	UniRef90_A0A062UC39_Uncharacterized_protein_n=2_Tax=Hyphomonas_RepID=A0A062UC39_9RHOB
OG_10743	0	0	0	0	0.26	0	0	0	0	0	0	0	UniRef90_A0A059FW00_Uncharacterized_protein_n=1_Tax=Hyphomonas_johnsonii_MHS-2_RepID=A0A059FW00_9RHOB
OG_10744	0	0	0	0.08	0.13	0	0	0	0	0	0	0	UniRef90_A0Z0H4_Ribulose-phosphate_3-epimerase_n=1_Tax=marine_gamma_proteobacterium_HTCC2080_RepID=A0Z0H4_9GAMM
OG_10745	0.05	0	0	0	0	0	0	0	0	0	0	0	UniRef90_A0A0J8JM05_Uncharacterized_protein_n=1_Tax=Gammaproteobacteria_bacterium_Q1_RepID=A0A0J8JM05_9GAMM
OG_10746	0	0.15	0	0	0	0	0	0	0	0	0	0	UniRef90_A0A0J9H2X2_Flagellar_hook-associated_protein_FlgL_n=1_Tax=alpha_proteobacterium_symbiont_of_Oscarella_lobularis_RepID=A0A0J9H2X2_9PROT
OG_10747	0	0	0	0	0	0	0	0	0	0	0	0	UniRef90_A0A0F2QPH1_Putative_NADH_dehydrogenase/NAD(P)H_nitroreductase_VR75_05675_n=1_Tax=Hyphomonadaceae_bacterium_BRH_c29_RepID=A0A0F2QPH1_9RHOB
OG_10748	0	0	0.17	0	0	0	0	0	0	0	0	0	UniRef90_A0A059EAV8_Beta-lactamase_n=2_Tax=Hyphomonas_RepID=A0A059EAV8_9RHOB
OG_10749	0	0	0	0	0	0	0	0	0	0	0	0	UniRef90_A0A0C1H3A8_Alpha/beta_hydrolase_n=1_Tax=Ruegeria_sp._ANG-S4_RepID=A0A0C1H3A8_9RHOB
OG_1075	0.14	0	0.34	0.4	0.26	0.29	0	0	0	0	0	0	UniRef90_UPI0003785043_hypothetical_protein_n=1_Tax=Lewinella_cohaerens_RepID=UPI0003785043
OG_10750	0	0.15	0	0	0	0	41.7	10.72	24.87	9.76	18.86	7.73	UniRef90_A0A062VBJ9_Uncharacterized_protein_n=1_Tax=Hyphomonas_polymorpha_PS728_RepID=A0A062VBJ9_9RHOB
OG_10751	0	0	0	0	0	0	0	0	0	0	0	0	UniRef90_A0A062U222_Uncharacterized_protein_n=2_Tax=Hyphomonas_RepID=A0A062U222_9RHOB
OG_10752	0	0	0	0.08	0	0	0	0	0	0	0	0	UniRef90_C7D5E5_Extracellular_solute-binding_protein_family_5_n=1_Tax=Thalassobium_sp._R2A62_RepID=C7D5E5_9RHOB
OG_10753	0	0	0	0	0	0	0	0	0	0	0	0	UniRef90_A3U3L6_Transporter,_putative_n=1_Tax=Oceanicola_batsensis_(strain_ATCC_BAA-863_/_DSM_15984_/_HTCC2597)_RepID=A3U3L6_OCEBH
OG_10754	0	0	0	0	0	0	0	0	0	0	0	0	UniRef90_A0A069E9A0_DNA_protection_protein_n=1_Tax=Hyphomonas_adhaerens_MHS-3_RepID=A0A069E9A0_9RHOB
OG_10755	0	0	0	0	0	0	0	0	0	0	0	0	UniRef90_A0A062VDT0_Alpha/beta_fold_family_hydrolase_n=1_Tax=Hyphomonas_polymorpha_PS728_RepID=A0A062VDT0_9RHOB
OG_10756	0	0	0	0	0	0	0	0	0	0	0	0	UniRef90_A0A073JED4_Uncharacterized_protein_n=2_Tax=Sulfitobacter_RepID=A0A073JED4_9RHOB
OG_10757	0	0	0	0.08	0	0	0	0	0	0	0	0	UniRef90_A0A0F2QH72_Uncharacterized_protein_n=1_Tax=Hyphomonadaceae_bacterium_BRH_c29_RepID=A0A0F2QH72_9RHOB
OG_10758	0	0	0	0	0	0	0	0	0	0	0	0	UniRef90_A0A0B4BIK4_Phospholipase_n=1_Tax=Tateyamaria_sp._ANG-S1_RepID=A0A0B4BIK4_9RHOB
OG_10759	0	0	0	0	0	0	0	0	0	0	0	0	UniRef90_A4A7R2_3-oxoacyl-(Acyl-carrier-protein)_synthase_n=2_Tax=Congregibacter_RepID=A4A7R2_9GAMM
OG_1076	0.19	0.29	0.34	0.56	0.65	0.58	0	0	0	0	0	0	UniRef90_UPI0003706049_2-dehydro-3-deoxygluconokinase_n=1_Tax=Lewinella_cohaerens_RepID=UPI0003706049
OG_10760	0	0	0	0	0	0	0	0	0	0	0	0	UniRef90_A0A062TNV8_2-nitropropane_dioxygenase_n=3_Tax=Hyphomonas_RepID=A0A062TNV8_9RHOB
OG_10761	0.05	0	0	0	0.13	0	0	0	0	0	0	0	UniRef90_B7RZZ9_Putative_uncharacterized_protein_n=2_Tax=marine_gamma_proteobacterium_HTCC2148_RepID=B7RZZ9_9GAMM
OG_10762	0	0	0.17	0	0	0	0	0	0	0	0	0	UniRef90_A0A0B4CC35_Histidine_kinase_n=1_Tax=Tateyamaria_sp._ANG-S1_RepID=A0A0B4CC35_9RHOB
OG_10763	0.28	0	0.34	0	0	0	0	0	0	0	0	0	UniRef90_D3NUG6_Transcriptional_regulator_n=6_Tax=Azospirillum_RepID=D3NUG6_AZOS1
OG_10764	0	0	0	0	0	0	0	0	0	0	0	0	UniRef90_A3VX54_Uncharacterized_protein_n=2_Tax=Roseovarius_RepID=A3VX54_9RHOB
OG_10765	0	0	0	0	0	0	0	0	0	0	0	0	UniRef90_A0A0D8CH77_Uncharacterized_protein_n=1_Tax=Thalassospira_sp._HJ_RepID=A0A0D8CH77_9PROT
OG_10766	0	0	0	0	0	0	0	0	0	0	0	0	UniRef90_A0A0F7L4I9_Uncharacterized_protein_n=1_Tax=uncultured_marine_virus_RepID=A0A0F7L4I9_9VIRU
OG_10767	0	0	0	0	0	0	0	0	0	0	0	0	UniRef90_A0A0F4RT68_Cell_division_protein_FtsX_n=4_Tax=Ruegeria_RepID=A0A0F4RT68_9RHOB
OG_10768	0	0.15	0	0	0.13	0.15	0	0	0	0	0	0	UniRef90_A0A069E824_Uncharacterized_protein_n=1_Tax=Hyphomonas_adhaerens_MHS-3_RepID=A0A069E824_9RHOB
OG_10769	0	0	0	0	0	0	0	0	0	0	0	0	UniRef90_A3SQM6_Methylmalonyl-CoA_mutase_n=1_Tax=Roseovarius_nubinhibens_(strain_ATCC_BAA-591_/_DSM_15170_/_ISM)_RepID=A3SQM6_ROSNI
OG_1077	1.9	0.29	0.34	0.24	0.26	0.15	0	0	0	0	0	0	UniRef90_A0A098S4U5_Cytochrome_C_oxidase_n=1_Tax=Phaeodactylibacter_xiamenensis_RepID=A0A098S4U5_9SPHI
OG_10770	0.19	0	0.17	0	0	0	0	0	0	0	0	0	UniRef90_Q1GEQ0_Capsule_polysaccharide_biosynthesis_n=4_Tax=Ruegeria_RepID=Q1GEQ0_RUEST
OG_10771	0	0	0.17	0.08	0	0	0	0	0	0	0	0	UniRef90_A0A0A0EEQ6_Fructose-1,6-bisphosphate_aldolase_n=1_Tax=Pseudooceanicola_atlanticus_RepID=A0A0A0EEQ6_9RHOB
OG_10772	0.05	0	0	0	0	0	0	0	0	0	0	0	UniRef90_K2JC89_Uncharacterized_protein_n=1_Tax=Oceanibaculum_indicum_P24_RepID=K2JC89_9PROT
OG_10773	0.14	0	0	0	0	0	0	0	0	0	0	0	UniRef90_B6IVX3_Uncharacterized_protein_n=1_Tax=Rhodospirillum_centenum_(strain_ATCC_51521_/_SW)_RepID=B6IVX3_RHOCS
OG_10774	0	0	0	0	0	0	0	0	0	0	0	0	UniRef90_K6ZEG5_Transcriptional_regulator,_TetR_family_protein_n=1_Tax=Paraglaciecola_arctica_BSs20135_RepID=K6ZEG5_9ALTE
OG_10775	0	0	0	0	0	0	0	0	0	0	0	0	UniRef90_A3SNL2_Uncharacterized_protein_n=2_Tax=Roseovarius_nubinhibens_RepID=A3SNL2_ROSNI
OG_10776	0	0	0	0	0	0	0	0	0	0	0	0	UniRef90_A0A095VQL0_Oligoribonuclease_n=1_Tax=Pseudohaliea_rubra_DSM_19751_RepID=A0A095VQL0_9GAMM
OG_10777	0	0	0	0	0	0	0	0	0	0	0	0	UniRef90_A0Z8L3_Uncharacterized_protein_n=1_Tax=marine_gamma_proteobacterium_HTCC2080_RepID=A0Z8L3_9GAMM
OG_10778	0	0	0	0.08	0	0	0	0	0	0	0	0	UniRef90_UPI0003820281_sugar-binding_protein_n=3_Tax=Salinispora_pacifica_RepID=UPI0003820281
OG_10779	0.14	0	0	0.08	0	0	0	0	0	0	0	0	UniRef90_A3WH77_Outer-membrane_lipoprotein_carrier_protein_n=1_Tax=Erythrobacter_sp._NAP1_RepID=A3WH77_9SPHN
OG_1078	0.28	0.15	0.84	0.56	0.39	0.29	0	0	0	0	0	0	UniRef90_L8JQF0_Uncharacterized_protein_n=1_Tax=Fulvivirga_imtechensis_AK7_RepID=L8JQF0_9BACT
OG_10780	0.09	0	0	0.24	0	0	0	0	0	0	0	0	UniRef90_B8KKR4_Putative_uncharacterized_protein_n=1_Tax=gamma_proteobacterium_NOR5-3_RepID=B8KKR4_9GAMM
OG_10781	0	0	0	0	0	0	0	0	0	0	0	0	UniRef90_F4L4F8_ABC_transporter_transmembrane_region_n=1_Tax=Haliscomenobacter_hydrossis_(strain_ATCC_27775_/_DSM_1100_/_LMG_10767_/_O)_RepID=F4L4F8_HALH1
OG_10782	0.05	0	0	0	0	0	0	0	0	0	0	0	UniRef90_A6FTY2_MOSC_domain_protein_n=1_Tax=Roseobacter_sp._AzwK-3b_RepID=A6FTY2_9RHOB
OG_10783	0	0.15	0	0	0	0	0	0	0	0	0	0	UniRef90_A0A0C1JBT5_Transglutaminase_n=1_Tax=Ruegeria_sp._ANG-S4_RepID=A0A0C1JBT5_9RHOB
OG_10784	0	0	0	0	0	0	0	0	0	0	0	0	UniRef90_A3SJG1_Uncharacterized_protein_n=1_Tax=Roseovarius_nubinhibens_(strain_ATCC_BAA-591_/_DSM_15170_/_ISM)_RepID=A3SJG1_ROSNI
OG_10785	0	0	0	0	0	0.15	0	0	0	0	0	0	UniRef90_B8KN60_Na+/solute_symporter_n=1_Tax=gamma_proteobacterium_NOR5-3_RepID=B8KN60_9GAMM
OG_10786	0	0	0	0	0	0	0	0	0	0	0	0	UniRef90_A0Z227_2-hydroxychromene-2-carboxylate_isomerase,_putative_n=2_Tax=OM60_clade_RepID=A0Z227_9GAMM
OG_10787	0.05	0	0	0	0	0	0	0	0	0	0	0	UniRef90_A0A059FJL2_Enoyl-CoA_hydratase/isomerase_family_protein_n=1_Tax=Hyphomonas_johnsonii_MHS-2_RepID=A0A059FJL2_9RHOB
OG_10788	0	0	0	0	0	0	0	0	0	0	0	0	UniRef90_A0A0B4D6A1_Uncharacterized_protein_n=1_Tax=Tateyamaria_sp._ANG-S1_RepID=A0A0B4D6A1_9RHOB
OG_10789	0.05	0.15	0.17	0	0	0	0	0	0	0	0	0	UniRef90_A0A0J9E8M8_Flagellar_basal_body-associated_protein_FliL_n=1_Tax=alpha_proteobacterium_symbiont_of_Oscarella_lobularis_RepID=A0A0J9E8M8_9PROT
OG_1079	0	0	0	0.08	0	0.15	0	0	0	0	0	0	UniRef90_A0A0C1X0F4_Uncharacterized_protein_n=1_Tax=Aphanocapsa_montana_BDHKU210001_RepID=A0A0C1X0F4_9CHRO
OG_10790	0	0	0	0	0	0	0	0	0	0	0	0	UniRef90_A8LQX3_DoxX_family_protein_n=1_Tax=Dinoroseobacter_shibae_(strain_DSM_16493_/_NCIMB_14021_/_DFL_12)_RepID=A8LQX3_DINSH
OG_10791	0.28	0	0.34	0	0	0	0	0	0	0	0	0	UniRef90_A3V0U3_ABC_branched_amino_acid_transporter_family,_periplasmic_substrate-binding_subunit_n=2_Tax=Loktanella_vestfoldensis_RepID=A3V0U3_9RHOB
OG_10792	0	0	0	0	0.13	0	0	0	0	0	0	0	UniRef90_A0A069E410_Glutathione_S-transferase_n=4_Tax=Hyphomonadaceae_RepID=A0A069E410_9RHOB
OG_10793	0	0	0.17	0	0	0	0	0	0	0	0	0	UniRef90_A6FPE2_Uncharacterised_conserved_protein_UCP032025_n=1_Tax=Roseobacter_sp._AzwK-3b_RepID=A6FPE2_9RHOB
OG_10794	0.05	0	0	0.08	0	0	0	0	0	0	0	0	UniRef90_A0Z0P5_Exoribonuclease_II_n=2_Tax=marine_gamma_proteobacterium_HTCC2080_RepID=A0Z0P5_9GAMM
OG_10795	0	0	0.17	0	0	0	0	0	0	0	0	0	UniRef90_A3XCV8_Uncharacterized_protein_n=2_Tax=Rhodobacteraceae_RepID=A3XCV8_9RHOB
OG_10796	0	0	0	0	0	0	0	0	0	0	0	0	UniRef90_A0A073IWR2_Uncharacterized_protein_n=2_Tax=Sulfitobacter_RepID=A0A073IWR2_9RHOB
OG_10797	0.09	0	0	0	0	0	0	0	0	0	0	0	UniRef90_A0Z8V5_Uncharacterized_protein_n=1_Tax=marine_gamma_proteobacterium_HTCC2080_RepID=A0Z8V5_9GAMM
OG_10798	0	0	0	0	0	0	0	0	0	0	0	0	UniRef90_A0A076K5S9_Uncharacterized_protein_n=1_Tax=Planktomarina_temperata_RCA23_RepID=A0A076K5S9_9RHOB
OG_10799	0	0	0	0	0	0	0	0	0	0	0	0	UniRef90_Q1GI36_LPS-assembly_protein_LptD_n=4_Tax=Ruegeria_RepID=Q1GI36_RUEST
OG_108	2.75	9.39	3.03	6.72	5.04	3.35	0	0	0	0	0	0	UniRef90_A0A098RYC5_Alkyl_hydroperoxide_reductase_n=1_Tax=Phaeodactylibacter_xiamenensis_RepID=A0A098RYC5_9SPHI
OG_1080	0.09	0.15	0	0.48	0.52	0.15	0	0	0	0	0	0	UniRef90_A0A098LH44_Uncharacterized_protein_n=2_Tax=Sporocytophaga_myxococcoides_RepID=A0A098LH44_9BACT
OG_10800	0	0	0.17	0	0	0	0	0	0	0	0	0	UniRef90_Q1GDZ9_Uncharacterized_protein_n=8_Tax=Ruegeria_RepID=Q1GDZ9_RUEST
OG_10801	0	0	0	0	0	0	0	0	0	0	0	0	UniRef90_Q165S5_PfkB_family_kinase,_putative_n=3_Tax=Roseobacter_RepID=Q165S5_ROSDO
OG_10802	0.05	0	0	0	0	0.15	0	0	0	0	0	0	UniRef90_A0A074MSC4_Carnitine_dehydratase_n=1_Tax=Erythrobacter_litoralis_RepID=A0A074MSC4_9SPHN
OG_10803	0	0	0	0	0	0	0	0	0	0	0	0	UniRef90_A0A0C1J298_Flagellar_basal_body_P-ring_biosynthesis_protein_FlgA_n=3_Tax=Rhodobacteraceae_RepID=A0A0C1J298_9RHOB
OG_10804	0	0	0	0	0	0	0	0	0	0	0	0	UniRef90_A0A0J9E555_1-aminocyclopropane-1-carboxylate_deaminase_n=1_Tax=alpha_proteobacterium_symbiont_of_Oscarella_lobularis_RepID=A0A0J9E555_9PROT
OG_10805	0	0	0	0	0	0	0	0	0	0	0	0	UniRef90_A0A062USS5_Uncharacterized_protein_n=2_Tax=Hyphomonas_RepID=A0A062USS5_9RHOB
OG_10806	0	0	0	0	0	0	0	0	0	0	0	0	UniRef90_A0Z1S9_Transcriptional_regulatory_protein_n=2_Tax=marine_gamma_proteobacterium_HTCC2080_RepID=A0Z1S9_9GAMM
OG_10807	0	0	0	0	0	0	0	0	0	0	0	0	UniRef90_A0A0F2RVX7_SmpA/OmlA_n=2_Tax=Roseovarius_RepID=A0A0F2RVX7_9RHOB
OG_10808	0	0.15	0	0	0.52	0	0	0	0	0	0	0	UniRef90_A0A0D0ICW6_Strain_BSW5_contig_31,_whole_genome_shotgun_sequence_n=49_Tax=Vibrio_RepID=A0A0D0ICW6_VIBHA
OG_10809	0	0	0	0	0	0	0	0	0	0	0	0	UniRef90_A0A0B4BUE8_Sulfate_ABC_transporter_substrate-binding_protein_n=1_Tax=Tateyamaria_sp._ANG-S1_RepID=A0A0B4BUE8_9RHOB
OG_1081	0.66	1.17	0	2	0.39	0	42.27	20.84	9.41	9.76	12.66	4.37	UniRef90_D4ZUD1_Putative_uncharacterized_protein_n=1_Tax=Arthrospira_platensis_(strain_NIES-39_/_IAM_M-135)_RepID=D4ZUD1_ARTPN
OG_10810	0	0	0	0.16	0	0	0	0	0	0	0	0	UniRef90_A0A023BUW7_Phosphoribosylformylglycinamidine_synthase_n=2_Tax=Aquimarina_RepID=A0A023BUW7_9FLAO
OG_10811	0	0	0	0	0	0	0	0	0	0	0	0	UniRef90_K7XYN4_Uncharacterized_protein_n=1_Tax=uncultured_Mediterranean_phage_MEDS1_group_RepID=K7XYN4_9VIRU
OG_10812	0.05	0	0.17	0	0	0	0	0	0	0	0	0	UniRef90_B6B9F9_Aminotransferase_family_protein_n=12_Tax=Rhodobacterales_RepID=B6B9F9_9RHOB
OG_10813	0.05	0	0	0	0.13	0	0	0	0	0	0	0	UniRef90_A4ACK4_UPF0761_membrane_protein_KT71_19173_n=1_Tax=Congregibacter_litoralis_KT71_RepID=A4ACK4_9GAMM
OG_10814	0.05	0	0	0	0	0	0	0	0	0	0	0	UniRef90_A0A085TX64_Uncharacterized_protein_n=1_Tax=Thioclava_sp._13D2W-2_RepID=A0A085TX64_9RHOB
OG_10815	0	0	0	0	0	0	0	0	0	0	0	0
OG_10816	0	0	0	0	0	0	0	0	0	0	0	0	UniRef90_A0A059FG66_Uncharacterized_protein_n=3_Tax=Hyphomonas_RepID=A0A059FG66_9RHOB
OG_10817	0.14	0	0.34	0	0	0	0	0	0	0	0	0	UniRef90_A0Z6H0_Patatin_family_protein_n=1_Tax=marine_gamma_proteobacterium_HTCC2080_RepID=A0Z6H0_9GAMM
OG_10818	0	0	0	0	0.26	0	0	0	0	0	0	0	UniRef90_A0YE37_Glutathione_S-transferase_n=1_Tax=marine_gamma_proteobacterium_HTCC2143_RepID=A0YE37_9GAMM
OG_10819	0	0	0	0	0	0	0	0	0	0	0	0	UniRef90_A0A0F9IAP4_Uncharacterized_protein_n=1_Tax=marine_sediment_metagenome_RepID=A0A0F9IAP4_9ZZZZ
OG_1082	0.14	0	0.34	0	0.26	0	64.16	71.92	54.12	57.9	42.51	16.04	UniRef90_Q10Z90_von_Willebrand_factor,_type_A_n=2_Tax=Trichodesmium_erythraeum_RepID=Q10Z90_TRIEI
OG_10820	0	0	0	0	0	0	0	0	0	0	0	0	UniRef90_A0A074MHA0_UPF0178_protein_EH31_05830_n=1_Tax=Erythrobacter_longus_RepID=A0A074MHA0_ERYLO
OG_10821	0	0	0.34	0.16	0	0	0	0	0	0	0	0	UniRef90_K0E991_Uncharacterized_protein_n=2_Tax=Alteromonas_macleodii_RepID=K0E991_ALTMB
OG_10822	0	0	0	0	0	0.15	0	0	0	0	0	0
OG_10823	0	0	0	0	0.13	0	0	0	0	0	0	0	UniRef90_A3WHV4_Photosynthetic_reaction_center_L_subunit_n=1_Tax=Erythrobacter_sp._NAP1_RepID=A3WHV4_9SPHN
OG_10824	0.09	0	0	0	0	0	0	0	0	0	0	0	UniRef90_Q1GL11_Uncharacterized_protein_n=4_Tax=Ruegeria_RepID=Q1GL11_RUEST
OG_10825	0	0.29	0	0	0	0	0	0	0	0	0	0	UniRef90_UPI0005632363_integrase_n=1_Tax=Roseobacter_sp._AzwK-3b_RepID=UPI0005632363
OG_10826	0.19	0	0	0	0	0	0	0	0	0	0	0	UniRef90_Q1AZ59_Methyltransferase_type_12_n=1_Tax=Rubrobacter_xylanophilus_(strain_DSM_9941_/_NBRC_16129)_RepID=Q1AZ59_RUBXD
OG_10827	0	0.15	0	0	0	0	0	0	0	0	0	0	UniRef90_A6FPJ6_Uncharacterized_protein_n=1_Tax=Roseobacter_sp._AzwK-3b_RepID=A6FPJ6_9RHOB
OG_10828	0	0	0	0	0	0	0	0	0	0	0	0	UniRef90_A0A095WW85_Putative_NADH_oxidoreductase_n=1_Tax=Pseudohaliea_rubra_DSM_19751_RepID=A0A095WW85_9GAMM
OG_10829	0	0	0	0	0	0	0	0	0	0	0	0	UniRef90_A0A099TCA1_Membrane_protein_n=1_Tax=Thalassobacter_sp._16PALIMAR09_RepID=A0A099TCA1_9RHOB
OG_1083	0.14	0	0.06	0.72	0.13	0.15	22.98	100.37	60.61	7.68	29.98	7.14	UniRef90_UPI000698175C_glycosyl_transferase_family_1_n=1_Tax=Aureispira_sp._CCB-QB1_RepID=UPI000698175C
OG_10830	0.14	0	0	0	0	0	0	0	0	0	0	0	UniRef90_R5QHD0_Uncharacterized_protein_n=1_Tax=Acetobacter_sp._CAG:977_RepID=R5QHD0_9PROT
OG_10831	0	0	0	0	0	0	0	0	0	0	0	0	UniRef90_A6FTF9_Uncharacterized_protein_n=1_Tax=Roseobacter_sp._AzwK-3b_RepID=A6FTF9_9RHOB
OG_10832	0	0	0	0	0	0	0	0	0	0	0	0	UniRef90_A0A0F2RBY9_Flagellar_biosynthesis_repressor_FlbT_n=1_Tax=Hyphomonas_sp._BRH_c22_RepID=A0A0F2RBY9_9RHOB
OG_10833	0	0	0	0	0	0	0	0	0	0	0	0	UniRef90_I0IFS0_Uncharacterized_protein_n=1_Tax=Phycisphaera_mikurensis_(strain_NBRC_102666_/_KCTC_22515_/_FYK2301M01)_RepID=I0IFS0_PHYMF
OG_10834	0.19	0	0	0	0	0	0	0	0	0	0	0	UniRef90_UPI00048D634E_chemotaxis_protein_CheZ_n=1_Tax=Azospirillum_halopraeferens_RepID=UPI00048D634E
OG_10835	0	0	0	0.08	0	0	0	0	0	0	0	0	UniRef90_A0A099T6Q0_Uncharacterized_protein_n=2_Tax=Rhodobacteraceae_RepID=A0A099T6Q0_9RHOB
OG_10836	0	0	0	0	0	0	0	0	0	0	0	0	UniRef90_Q58MP3_Baseplate_wedge_initiator_n=3_Tax=Prochlorococcus_phage_P-SSM2_RepID=Q58MP3_BPPRM
OG_10837	0.09	0.15	0.34	0.08	0	0	0	0	0	0	0	0	UniRef90_A0A0H5D3A5_Oligopeptide-binding_protein_AppA_n=3_Tax=Rhodobacteraceae_RepID=A0A0H5D3A5_9RHOB
OG_10838	0	0.29	0	0.08	0	0	0	0	0	0	0	0	UniRef90_A0A090AHG8_Aldose_epimerase_n=1_Tax=Thioploca_ingrica_RepID=A0A090AHG8_9GAMM
OG_10839	0	0	0	0	0	0	0	0	0	0	0	0	UniRef90_G8ALM7_Putative_lytic_transglycosylase_n=3_Tax=Azospirillum_brasilense_RepID=G8ALM7_AZOBR
OG_1084							143.43	69.58	111.6	33.59	65.38	14.43	UniRef90_UPI00063F039A_hypothetical_protein_n=1_Tax=Trichodesmium_erythraeum_RepID=UPI00063F039A
OG_10840	0	0	0	0.08	0	0	0	0	0	0	0	0	UniRef90_A4A3Y1_Putative_permease_n=1_Tax=Congregibacter_litoralis_KT71_RepID=A4A3Y1_9GAMM
OG_10841	0	0	0	0	0	0	0	0	0	0	0	0	UniRef90_A3X6J9_Hydroxypyruvate_isomerase_n=1_Tax=Roseobacter_sp._MED193_RepID=A3X6J9_9RHOB
OG_10842	0	0	0	0	0	0	0	0	0	0	0	0	UniRef90_UPI000680FD7E_ABC_transporter_permease_n=1_Tax=Aestuariivita_boseongensis_RepID=UPI000680FD7E
OG_10843	0	0	0	0	0	0	0	0	0	0	0	0	UniRef90_A0A0A0HUU9_Family_description/AAA_domain_protein_n=6_Tax=Roseovarius_RepID=A0A0A0HUU9_9RHOB
OG_10844	0.05	0	0	0	0	0	0	0	0	0	0	0	UniRef90_A0A0G3S2V2_Adenylylsulfate_kinase_n=22_Tax=Klebsiella_oxytoca_RepID=A0A0G3S2V2_KLEOX
OG_10845	0	0	0	0	0	0	0	0	0	0	0	0	UniRef90_A0A017HCX4_Iron-responsive_regulator_Irr_n=2_Tax=Loktanella_hongkongensis_RepID=A0A017HCX4_9RHOB
OG_10846	0	0	0	0	0	0	0	0	0	0	0	0	UniRef90_A0A0J9E970_Glyoxalase/bleomycin_resistance_protein/dioxygenase_n=1_Tax=alpha_proteobacterium_symbiont_of_Oscarella_lobularis_RepID=A0A0J9E970_9PROT
OG_10847	0.05	0.44	0.17	0	0	0	0	0	0	0	0	0	UniRef90_UPI0005A9C28B_ribonucleotide-diphosphate_reductase_subunit_beta_n=1_Tax=Rhodovulum_sulfidophilum_RepID=UPI0005A9C28B
OG_10848	0	0	0	0	0	0	0	0	0	0	0	0	UniRef90_B8KVB5_Pyrroloquinoline-quinone_synthase_n=2_Tax=Luminiphilus_RepID=B8KVB5_9GAMM
OG_10849	0	0	0.17	0.08	0	0	0	0	0	0	0	0	UniRef90_UPI0006978570_hypothetical_protein_n=1_Tax=Phaeodactylibacter_xiamenensis_RepID=UPI0006978570
OG_1085	0.81	0	0.34	0.56	0.13	0.44	15.49	61.8	10.59	18.47	19.9	4.23	UniRef90_A0A098S6Q8_Ribonuclease_HII_n=1_Tax=Phaeodactylibacter_xiamenensis_RepID=A0A098S6Q8_9SPHI
OG_10850	0	0	0	0	0.13	0.15	0	0	0	0	0	0	UniRef90_A0A0F9KEQ9_Uncharacterized_protein_n=1_Tax=marine_sediment_metagenome_RepID=A0A0F9KEQ9_9ZZZZ
OG_10851	0	0	0	0	0.52	0	0	0	0	0	0	0
OG_10852	0.14	0	0	0	0	0	0	0	0	0	0	0	UniRef90_A0A0F6W7E5_Uncharacterized_protein_n=1_Tax=Sandaracinus_amylolyticus_RepID=A0A0F6W7E5_9DELT
OG_10853	0	0.15	0	0.08	0	0	0	0	0	0	0	0	UniRef90_A0A061STC9_Inorganic_phosphate_transporter_n=2_Tax=Sulfitobacter_mediterraneus_RepID=A0A061STC9_9RHOB
OG_10854	0	0.15	0	0.08	0	0	0	0	0	0	0	0	UniRef90_B8KQ72_LPS-assembly_protein_LptD_n=2_Tax=gamma_proteobacterium_NOR5-3_RepID=B8KQ72_9GAMM
OG_10855	0	0	0	0	0	0	0	0	0	0	0	0	UniRef90_M4QSA6_Uncharacterized_protein_n=1_Tax=Synechococcus_phage_S-SKS1_RepID=M4QSA6_9CAUD
OG_10856	0	0	0	0	0	0	0	0	0	0	0	0	UniRef90_B8KGG9_Xanthine_dehydrogenase,_small_subunit_n=1_Tax=gamma_proteobacterium_NOR5-3_RepID=B8KGG9_9GAMM
OG_10857	0	0	0	0	0	0	0	0	0	0	0	0	UniRef90_A4A5G3_Cell_division_protein_FtsQ_n=1_Tax=Congregibacter_litoralis_KT71_RepID=A4A5G3_9GAMM
OG_10858	0	0	0	0.08	0	0	0	0	0	0	0	0	UniRef90_A4AD26_Site-specific_recombinase_XerD_n=4_Tax=unclassified_Gammaproteobacteria_RepID=A4AD26_9GAMM
OG_10859	0	0.15	0	0	0	0	0	0	0	0	0	0	UniRef90_A4A0B4_Uncharacterized_protein_n=1_Tax=Blastopirellula_marina_DSM_3645_RepID=A4A0B4_9PLAN
OG_1086	0.05	0.29	0	0.16	0.52	0.44	0	0	0	0	0	0	UniRef90_UPI0003716DD4_hypothetical_protein_n=1_Tax=Lewinella_cohaerens_RepID=UPI0003716DD4
OG_10860	0	0	0	0	0	0	0	0	0	0	0	0	UniRef90_A0A0F7PH91_Malonyl-CoA_decarboxylase_(MCD)_n=2_Tax=Hoeflea_sp._IMCC20628_RepID=A0A0F7PH91_9RHIZ
OG_10861	0	0	0	0	0.13	0	0	0	0	0	0	0	UniRef90_H9YSC3_Uncharacterized_protein_n=1_Tax=Environmental_Halophage_eHP-30_RepID=H9YSC3_9VIRU
OG_10862	0	0	0	0	0	0	0	0	0	0	0	0	UniRef90_X0ZMV1_Marine_sediment_metagenome_DNA,_contig:_S01H4_C01571_n=4_Tax=marine_sediment_metagenome_RepID=X0ZMV1_9ZZZZ
OG_10863	0.24	0	0	0.08	0	0	0	0	0	0	0	0	UniRef90_F8CNZ1_Uncharacterized_protein_n=1_Tax=Myxococcus_fulvus_(strain_ATCC_BAA-855_/_HW-1)_RepID=F8CNZ1_MYXFH
OG_10864	0	0	0.17	0	0	0	0	0	0	0	0	0	UniRef90_A9E2N0_Uncharacterized_protein_n=1_Tax=Oceanibulbus_indolifex_HEL-45_RepID=A9E2N0_9RHOB
OG_10865	0	0	0	0	0	0	0	0	0	0	0	0	UniRef90_B8KSJ4_Phosphate-starvation-inducible_E_n=2_Tax=Luminiphilus_RepID=B8KSJ4_9GAMM
OG_10866	0	0	0	0	0	0	0	0	0	0	0	0	UniRef90_A4A603_Flagellar_biosynthetic_protein_FliS_n=1_Tax=Congregibacter_litoralis_KT71_RepID=A4A603_9GAMM
OG_10867	0	0	0.34	0	0	0	0	0	0	0	0	0	UniRef90_A1SFS8_Uncharacterized_protein_n=2_Tax=Nocardioides_sp._(strain_BAA-499_/_JS614)_RepID=A1SFS8_NOCSJ
OG_10868	0	0.15	0.34	0.32	0.65	0.15	0	0	0	0	0	0	UniRef90_UPI00031D1B38_hypothetical_protein_n=1_Tax=Nodosilinea_nodulosa_RepID=UPI00031D1B38
OG_10869	0	0	0	0	0	0	14.74	19.82	8.74	5.76	15.89	3.5	UniRef90_A0A0C2LLC9_Nitrilase_n=2_Tax=Nostocales_RepID=A0A0C2LLC9_9CYAN
OG_1087	0.47	0.29	0.84	0.48	0.39	0.15	3.98	2.94	5.21	0.96	3.1	0.73	UniRef90_A0A098SEQ2_Penicillin-binding_protein_n=3_Tax=Bacteria_RepID=A0A098SEQ2_9SPHI
OG_10870	0	0	0	0.08	0.13	0.29	0	0	0	0	0	0	UniRef90_A0A0F6W4W9_Uncharacterized_protein_n=1_Tax=Sandaracinus_amylolyticus_RepID=A0A0F6W4W9_9DELT
OG_10871							19.95	6.16	6.39	12.96	8.92	2.77	UniRef90_UPI0004874E32_hypothetical_protein_n=1_Tax=Aphanizomenon_flos-aquae_RepID=UPI0004874E32
OG_10872							24.07	14.97	10.59	17.59	11.11	5.39	UniRef90_Q117Q0_Uncharacterized_protein_n=2_Tax=Trichodesmium_erythraeum_RepID=Q117Q0_TRIEI
OG_10873							2.65	1.47	7.39	9.84	5.17	1.6	UniRef90_D8FUD5_Putative_uncharacterized_protein_n=1_Tax=[Oscillatoria]_sp._PCC_6506_RepID=D8FUD5_9CYAN
OG_10874	0	0.59	0.17	0.56	0.39	0	0.05	0.88	0.17	2.96	0.52	1.31	UniRef90_C6BZF1_Restriction_modification_system_DNA_specificity_domain_protein_n=1_Tax=Desulfovibrio_salexigens_(strain_ATCC_14822_/_DSM_2638_/_NCIB_8403_/_VKM_B-1763)_RepID=C6BZF1_DESAD
OG_10875							0.09	0.59	0	0.88	0.65	0.44
OG_10876	0	0	0	0	0	0	0	0	0	0	0	0	UniRef90_F4KQF2_Membrane_alanyl_aminopeptidase_n=1_Tax=Haliscomenobacter_hydrossis_(strain_ATCC_27775_/_DSM_1100_/_LMG_10767_/_O)_RepID=F4KQF2_HALH1
OG_10877	0	0	0	0	0	0	0	0	0	0	0	0
OG_10878	0	0	0	0.08	0.13	0	0	0	0	0	0	0
OG_10879	0	0	0	0.08	0.13	0	0	0	0	0	0	0	UniRef90_G8TQX3_Uncharacterized_protein_n=1_Tax=Niastella_koreensis_(strain_DSM_17620_/_KACC_11465_/_GR20-10)_RepID=G8TQX3_NIAKG
OG_1088	0.19	1.03	0.5	0.88	0.13	0.44	384.77	53.72	173.11	450.95	292.79	98.56	UniRef90_UPI0005C553D1_serine_acetyltransferase_n=1_Tax=Phaeodactylibacter_xiamenensis_RepID=UPI0005C553D1
OG_10880	0	0	0	0	0	0.15	0	0	0	0	0	0	UniRef90_D5EN82_Ig_family_protein_n=1_Tax=Coraliomargarita_akajimensis_(strain_DSM_45221_/_IAM_15411_/_JCM_23193_/_KCTC_12865)_RepID=D5EN82_CORAD
OG_10881	0	0	0	0.16	0	0	0	0	0	0	0	0	UniRef90_D8P7Z2_Uncharacterized_protein_n=1_Tax=Nitrospira_defluvii_RepID=D8P7Z2_9BACT
OG_10882	0	0	0	0	0	0	0	0	0	0	0	0
OG_10883	0	0	0	0	0	0	0	0	0	0	0	0	UniRef90_I2ERC4_Peptidase_M20_n=1_Tax=Emticicia_oligotrophica_(strain_DSM_17448_/_GPTSA100-15)_RepID=I2ERC4_EMTOG
OG_10884	0	0	0	0	0	0	0	0	0	0	0	0
OG_10885	0	0	0	0	0	0	0	0	0	0	0	0	UniRef90_UPI00036B26F4_hypothetical_protein_n=1_Tax=Niabella_aurantiaca_RepID=UPI00036B26F4
OG_10886	0	0	0	0	0	0.15	0	0	0	0	0	0	UniRef90_UPI00068687E9_hypothetical_protein_n=1_Tax=Alicyclobacillus_pomorum_RepID=UPI00068687E9
OG_10887	0.38	0	0.17	0	0	0	0	0	0	0	0	0	UniRef90_A0A024FCP2_Uncharacterized_protein_n=1_Tax=Winogradskyella_sp._PG-2_RepID=A0A024FCP2_9FLAO
OG_10888	0	0	0	0.08	0.26	0	0	0	0	0	0	0	UniRef90_F4KWT3_Uncharacterized_protein_n=1_Tax=Haliscomenobacter_hydrossis_(strain_ATCC_27775_/_DSM_1100_/_LMG_10767_/_O)_RepID=F4KWT3_HALH1
OG_10889	0	0	0	0	0	0	0	0	0	0	0	0
OG_1089	0.14	0	0	0.32	0.26	0	0	0	0	0	0	0	UniRef90_A0A098SAK1_Short-chain_dehydrogenase_n=2_Tax=Bacteria_RepID=A0A098SAK1_9SPHI
OG_10890	0	0	0	0.08	0	0	0	0	0	0	0	0	UniRef90_UPI000629ABA4_hypothetical_protein_n=1_Tax=Kordia_jejudonensis_RepID=UPI000629ABA4
OG_10891	0	0	0	0.24	0.26	0	0	0	0	0	0	0
OG_10892	0	0	0	0	0	0	0	0	0	0	0	0
OG_10893	2.42	5.14	7.56	17.59	19.51	20.41	0	0	0	0	0	0	UniRef90_A0A099XQL9_Uncharacterized_protein_n=1_Tax=Polaribacter_sp._Hel1_33_49_RepID=A0A099XQL9_9FLAO
OG_10894	0	0	0	0	0	0	0	0	0	0	0	0
OG_10895	0.09	0	0.17	0	0	0	0	0	0	0	0	0	UniRef90_UPI00047ECD88_glycerol_acyltransferase_n=1_Tax=Flexibacter_roseolus_RepID=UPI00047ECD88
OG_10896	0	0	0	0.16	0	0	0	0	0	0	0	0	UniRef90_G8TG01_Radical_SAM_domain_protein_n=1_Tax=Niastella_koreensis_(strain_DSM_17620_/_KACC_11465_/_GR20-10)_RepID=G8TG01_NIAKG
OG_10897	0	0	0	0	0	0.15	0	0	0	0	0	0	UniRef90_Q5Y1B5_Putative_uncharacterized_protein_n=1_Tax=uncultured_organism_BAC21E04_RepID=Q5Y1B5_9ZZZZ
OG_10898	0	0	0	0.08	0	0	0	0	0	0	0	0	UniRef90_F4L7X8_Uncharacterized_protein_n=1_Tax=Haliscomenobacter_hydrossis_(strain_ATCC_27775_/_DSM_1100_/_LMG_10767_/_O)_RepID=F4L7X8_HALH1
OG_10899	0	0	0	0.08	0.52	0	0	0	0	0	0	0	UniRef90_A0A0F9FTT2_Uncharacterized_protein_(Fragment)_n=1_Tax=marine_sediment_metagenome_RepID=A0A0F9FTT2_9ZZZZ
OG_109	8.2	21.58	11.76	19.19	20.54	14.87	8841.23	3029.73	3027.89	5908.06	5467.28	1894.52	UniRef90_Q10YV0_ATP-dependent_zinc_metalloprotease_FtsH_n=2_Tax=Trichodesmium_erythraeum_RepID=Q10YV0_TRIEI
OG_1090	0.28	1.47	0.34	0.24	0.39	0.29	0	1.03	0.17	0.96	0	0	UniRef90_A0A060RDU5_Mobile_element_protein_n=2_Tax=Mucinivorans_hirudinis_RepID=A0A060RDU5_9BACT
OG_10900	0	0	0	0.32	0.13	0	0	0	0	0	0	0	UniRef90_D6PJG8_Putative_uncharacterized_protein_n=1_Tax=uncultured_organism_MedDCM-OCT-S12-C74_RepID=D6PJG8_9ZZZZ
OG_10901	0	0	0	0.72	2.71	1.02	0	0	0	0	0	0	UniRef90_D5C5E4_Uncharacterized_protein_n=1_Tax=Nitrosococcus_halophilus_(strain_Nc4)_RepID=D5C5E4_NITHN
OG_10902	0	0	0	0	0	0	0	0	0	0	0	0	UniRef90_E0MRR3_Uncharacterized_protein_n=1_Tax=Ahrensia_sp._R2A130_RepID=E0MRR3_9RHOB
OG_10903	0	0	0	0	0	0	0	0	0	0	0	0
OG_10904	0	0	0	0.08	0.26	0.15	0	0	0	0	0	0	UniRef90_A0A098S209_Uncharacterized_protein_n=1_Tax=Phaeodactylibacter_xiamenensis_RepID=A0A098S209_9SPHI
OG_10905	0.05	0	0.17	0	0	0	0	0	0	0	0	0	UniRef90_I2GD47_Adhesin_AidA-related_n=1_Tax=Fibrisoma_limi_BUZ_3_RepID=I2GD47_9BACT
OG_10906	0	0	0	0	0.52	0	0	0	0	0	0	0
OG_10907	0.05	0	0.17	0.24	0	0	0	0	0	0	0	0	UniRef90_K0B339_Aminoglycoside_phosphotransferase_Aph_n=1_Tax=Clostridium_acidurici_(strain_ATCC_7906_/_DSM_604_/_KCTC_5404_/_9a)_RepID=K0B339_CLOA9
OG_10908	0	0	0	0	0	0	0	0	0	0	0	0
OG_10909	0	0	0	0.24	0.13	0	0	0	0	0	0	0	UniRef90_A0A0J9DFP2_Uncharacterized_protein_n=2_Tax=Parabacteroides_sp._D26_RepID=A0A0J9DFP2_9PORP
OG_1091	0.85	4.7	2.52	2.56	3.88	2.62	0	0	0	0	0	0	UniRef90_A0A098S9Q0_ATP_synthase_subunit_b_n=1_Tax=Phaeodactylibacter_xiamenensis_RepID=A0A098S9Q0_9SPHI
OG_10910	0	0	0	1.68	3.49	1.17	0	0	0	0	0	0
OG_10911	0	0	0	0	0	0	0	0	0	0	0	0	UniRef90_A0A0C1IUZ8_Uncharacterized_protein_n=1_Tax=Flavihumibacter_solisilvae_RepID=A0A0C1IUZ8_9SPHI
OG_10912	0	0	0	0.08	0.52	0	0	0	0	0	0	0	UniRef90_A0A0E3HTF4_Uncharacterized_protein_n=3_Tax=unclassified_T4-like_viruses_RepID=A0A0E3HTF4_9CAUD
OG_10913	0	0	0	0	0	0	0	0	0	0	0	0	UniRef90_M4QS18_Uncharacterized_protein_n=1_Tax=Synechococcus_phage_S-SKS1_RepID=M4QS18_9CAUD
OG_10914	0	0	0	0.08	0.26	0	0	0	0	0	0	0	UniRef90_A0A0A7LNF0_Uncharacterized_protein_n=1_Tax=Hymenobacter_sp._DG25B_RepID=A0A0A7LNF0_9BACT
OG_10915	0	0	0	0	0	0	0	0	0	0	0	0	UniRef90_Q0QZJ9_Gp29_n=2_Tax=Synechococcus_phage_syn9_RepID=Q0QZJ9_BPSYS
OG_10916	0	0	0.34	0.08	0.13	0	0	0	0	0	0	0	UniRef90_A1ZYU4_Uncharacterized_protein_n=1_Tax=Microscilla_marina_ATCC_23134_RepID=A1ZYU4_9BACT
OG_10917	0	0.15	0	0.08	0.13	0	0	0	0	0	0	0	UniRef90_A0A0F9Q3W2_Uncharacterized_protein_n=1_Tax=marine_sediment_metagenome_RepID=A0A0F9Q3W2_9ZZZZ
OG_10918	0	0	0	0.08	0	0	0	0	0	0	0	0	UniRef90_A0A0F9SJP5_Uncharacterized_protein_n=1_Tax=marine_sediment_metagenome_RepID=A0A0F9SJP5_9ZZZZ
OG_10919	0	0	0	0	0.26	0	0	0	0	0	0	0	UniRef90_UPI000485F57F_FAD-linked_oxidase_n=1_Tax=Marinobacter_sp._HL-58_RepID=UPI000485F57F
OG_1092	0	0.44	0	0.64	0	0	6.02	15.12	5.21	13.59	15.12	2.04	UniRef90_G8R213_Deacetylase,_histone_deacetylase/acetoin_utilization_protein_n=1_Tax=Owenweeksia_hongkongensis_(strain_DSM_17368_/_JCM_12287_/_NRRL_B-23963)_RepID=G8R213_OWEHD
OG_10920	0	0	0	0.08	0.13	0	0	0	0	0	0	0	UniRef90_X0TT15_Marine_sediment_metagenome_DNA,_contig:_S01H1_L08415_(Fragment)_n=1_Tax=marine_sediment_metagenome_RepID=X0TT15_9ZZZZ
OG_10921	0	0	0	0	0	0	0	0	0	0	0	0	UniRef90_E3SJF6_Putative_uncharacterized_protein_n=1_Tax=Synechococcus_phage_S-SM2_RepID=E3SJF6_9CAUD
OG_10922	0	0	0	0.4	0.13	0.15	0	0	0	0	0	0	UniRef90_UPI000495A11F_phage_tail_tape_measure_protein_n=1_Tax=alpha_proteobacterium_Mf_1.05b.01_RepID=UPI000495A11F
OG_10923	0	0	0	0.08	0.13	0	0	0	0	0	0	0	UniRef90_R5JH80_Phage_protein_n=2_Tax=Peptostreptococcus_RepID=R5JH80_9FIRM
OG_10924	0.09	0	0	3.84	1.81	0.87	0	0	0	0	0	0	UniRef90_X0T591_Marine_sediment_metagenome_DNA,_contig:_S01H1_L01590_n=1_Tax=marine_sediment_metagenome_RepID=X0T591_9ZZZZ
OG_10925	0	0	0	0	0	0	0	0	0	0	0	0	UniRef90_X0UIL1_Marine_sediment_metagenome_DNA,_contig:_S01H1_S12883_n=1_Tax=marine_sediment_metagenome_RepID=X0UIL1_9ZZZZ
OG_10926	0	0	0	0	0	0	0	0	0	0	0	0	UniRef90_X0RG58_Marine_sediment_metagenome_DNA,_contig:_S01H1_L05813_n=1_Tax=marine_sediment_metagenome_RepID=X0RG58_9ZZZZ
OG_10927	0	0	0	0.16	0.39	0	0	0	0	0	0	0	UniRef90_A0A0F9I3Q0_Uncharacterized_protein_(Fragment)_n=1_Tax=marine_sediment_metagenome_RepID=A0A0F9I3Q0_9ZZZZ
OG_10928	0	0	0	0.08	0	0.15	0	0	0	0	0	0	UniRef90_A0A099Y3U8_Uncharacterized_protein_n=1_Tax=Polaribacter_sp._Hel1_85_RepID=A0A099Y3U8_9FLAO
OG_10929	0	0	0	0	0	0	0	0	0	0	0	0
OG_1093	0	0.29	0.17	1.44	0.52	0.29	763.47	337.9	352.27	476.06	334.65	101.62	UniRef90_A0A098S7X9_Uncharacterized_protein_n=1_Tax=Phaeodactylibacter_xiamenensis_RepID=A0A098S7X9_9SPHI
OG_10930	0.05	0	0.17	0	0	0	0	0	0	0	0	0	UniRef90_I0IAA7_Uncharacterized_protein_n=2_Tax=Phycisphaera_RepID=I0IAA7_PHYMF
OG_10931	0	0	0	0	0	0	0	0	0	0	0	0
OG_10932	0	0	0	0	0	0	0	0	0	0	0	0	UniRef90_I0IGE7_Flagellar_basal-body_rod_protein_FlgC_n=1_Tax=Phycisphaera_mikurensis_(strain_NBRC_102666_/_KCTC_22515_/_FYK2301M01)_RepID=I0IGE7_PHYMF
OG_10933	0.05	0	0	0	0	0	0	0	0	0	0	0	UniRef90_A0A0B4C753_Uncharacterized_protein_n=1_Tax=Tateyamaria_sp._ANG-S1_RepID=A0A0B4C753_9RHOB
OG_10934	0	0	0	0	0	0	0	0	0	0	0	0	UniRef90_UPI0002379948_trimethylamine_methyltransferase_n=2_Tax=Ruegeria_RepID=UPI0002379948
OG_10935	0	0	0	0	0	0	0	0	0	0	0	0	UniRef90_A4EZP9_Uncharacterized_protein_n=1_Tax=Roseobacter_sp._SK209-2-6_RepID=A4EZP9_9RHOB
OG_10936	0.05	0	0	0	0	0	0	0	0	0	0	0	UniRef90_A4WQI3_Transposase_IS3/IS911_family_protein_n=8_Tax=Rhodobacteraceae_RepID=A4WQI3_RHOS5
OG_10937	0	0	0	0	0	0	0	0	0	0	0	0	UniRef90_A0A0D8DRH7_Heme_utilization_protein_(Fragment)_n=1_Tax=Burkholderia_sp._USM_B20_RepID=A0A0D8DRH7_9BURK
OG_10938	0	0	0	0	0	0	0	0	0	0	0	0	UniRef90_A0A0A0HNU2_Sarcosine_oxidase_delta_subunit_n=6_Tax=Roseovarius_RepID=A0A0A0HNU2_9RHOB
OG_10939	0.05	0	0	0	0	0	0	0	0	0	0	0	UniRef90_A0A076JXB3_Transcriptional_regulator_MraZ_n=2_Tax=Planktomarina_RepID=A0A076JXB3_9RHOB
OG_1094	0.76	2.5	0.84	0.64	0.78	0.44	62.31	95.56	65.38	95.4	49.36	15.45	UniRef90_A0A098S2R3_Triosephosphate_isomerase_n=1_Tax=Phaeodactylibacter_xiamenensis_RepID=A0A098S2R3_9SPHI
OG_10940	0	0	0	0	0	0	0	0	0	0	0	0	UniRef90_A6C1K0_Probable_sodium/proline_symporter_(Proline_permease)_n=1_Tax=Gimesia_maris_DSM_8797_RepID=A6C1K0_9PLAN
OG_10941	0	0	0	0	0	0	0	0	0	0	0	0	UniRef90_C4WQ81_Trimethylamine_dehydrogenase_n=4_Tax=Ochrobactrum_RepID=C4WQ81_9RHIZ
OG_10942	0.24	0	0	0	0	0	0	0	0	0	0	0	UniRef90_UPI000375510C_hypothetical_protein_n=1_Tax=Kiloniella_laminariae_RepID=UPI000375510C
OG_10943	0	0	0	0	0	0	0	0	0	0	0	0	UniRef90_A0A037ZF04_Chorismate_mutase_n=1_Tax=Actibacterium_mucosum_KCTC_23349_RepID=A0A037ZF04_9RHOB
OG_10944	0.09	0	0.5	0	0	0	0	0	0	0	0	0	UniRef90_A0A081B6M4_Conserved_protein_n=1_Tax=alpha_proteobacterium_MA2_RepID=A0A081B6M4_9PROT
OG_10945	0	0	0	0	0	0	0	0	0	0	0	0
OG_10946	0	0	0	0	0	0.15	0	0	0	0	0	0	UniRef90_A0A0F9FYE1_Uncharacterized_protein_n=1_Tax=marine_sediment_metagenome_RepID=A0A0F9FYE1_9ZZZZ
OG_10947	0	0	0.84	0.32	2.58	1.46	0	0	0	0	0	0	UniRef90_A0A0F5C9E5_Uncharacterized_protein_n=1_Tax=Pristionchus_pacificus_RepID=A0A0F5C9E5_PRIPA
OG_10948	0	0	0.34	0.56	2.45	1.31	0	0	0	0	0	0
OG_10949	0	0	0	0	0	0	0	0	0	0	0	0
OG_1095	0.14	2.64	0.5	0.64	0.65	0.73	26.16	35.08	32.94	40.14	33.21	8.75	UniRef90_Q10WP0_Peptidase_M16-like_n=2_Tax=Trichodesmium_erythraeum_RepID=Q10WP0_TRIEI
OG_10950	0	0	0	0	0	0	0	0	0	0	0	0
OG_10951	0	0	0	0	0.13	0.15	0	0	0	0	0	0
OG_10952	0	0	0	0	0	0	0	0	0	0	0	0	UniRef90_E3SLH2_Nucleotide-sugar_epimerase_n=2_Tax=Synechococcus_phage_S-SSM7_RepID=E3SLH2_9CAUD
OG_10953	0.19	0.15	0.17	0	0	0	0	0	0	0	0	0
OG_10954	0	0.15	0	0	0.26	0.15	0	0	0	0	0	0	UniRef90_A0A067XQF5_Baseplate_wedge_protein_n=1_Tax=Caulobacter_phage_Cr30_RepID=A0A067XQF5_9CAUD
OG_10955	0.09	0	0	0	0	0	0	0	0	0	0	0	UniRef90_UPI00041DB74D_hypothetical_protein_n=1_Tax=Thermicanus_aegyptius_RepID=UPI00041DB74D
OG_10956	0	0	0	0.08	0	0	0	0	0	0	0	0	UniRef90_M1T2E5_Uncharacterized_protein_n=2_Tax=Synechococcus_phage_S-SSM4_RepID=M1T2E5_9CAUD
OG_10957	0	0	0	0	0	0	0	0	0	0	0	0	UniRef90_M4QS77_Uncharacterized_protein_n=1_Tax=Synechococcus_phage_S-SKS1_RepID=M4QS77_9CAUD
OG_10958	0	0	0	0.08	0.26	0	0	0	0	0	0	0
OG_10959	0	0	0	0	0	0	0	0	0	0	0	0	UniRef90_E3SIZ3_VrlC_protein_n=1_Tax=Synechococcus_phage_S-SM2_RepID=E3SIZ3_9CAUD
OG_1096	0	0.29	0.84	0.16	0.52	0	13.36	68.11	29.41	61.58	29.98	14.73	UniRef90_A0A098RYD1_RNA_methyltransferase_n=1_Tax=Phaeodactylibacter_xiamenensis_RepID=A0A098RYD1_9SPHI
OG_10960	0	0	0	0	0	0	0	0	0	0	0	0
OG_10961	0	0	0	0	0	0	0	0	0	0	0	0	UniRef90_M4PQW7_Uncharacterized_protein_n=2_Tax=Synechococcus_phage_S-SSM7_RepID=M4PQW7_9CAUD
OG_10962	0.09	0	0	0	0	0	0	0	0	0	0	0	UniRef90_UPI0002DBE370_hypothetical_protein_n=2_Tax=Marinilabilia_salmonicolor_RepID=UPI0002DBE370
OG_10963	0	0	0	0	0	0.15	0	0	0	0	0	0	UniRef90_UPI0003720D0B_hypothetical_protein_n=1_Tax=Flexithrix_dorotheae_RepID=UPI0003720D0B
OG_10964	0	0	0	0	0	0	0	0	0	0	0	0
OG_10965	0	0	0	0	0	0	0	0	0	0	0	0	UniRef90_M4QPV7_Uncharacterized_protein_n=1_Tax=Synechococcus_phage_S-SKS1_RepID=M4QPV7_9CAUD
OG_10966	0	0	0	0	0	0	0	0	0	0	0	0	UniRef90_R9TL86_Uncharacterized_protein_n=1_Tax=Synechococcus_phage_S-IOM18_RepID=R9TL86_9CAUD
OG_10967	0	0	0	0.08	0.26	0	0	0	0	0	0	0	UniRef90_M4QT40_Uncharacterized_protein_(Fragment)_n=1_Tax=Synechococcus_phage_S-SKS1_RepID=M4QT40_9CAUD
OG_10968	0	0	0	0	0	0	0	0	0	0	0	0	UniRef90_E3SPM8_Putative_uncharacterized_protein_n=2_Tax=Caudovirales_RepID=E3SPM8_9CAUD
OG_10969	0	0	0	0	0	0	0	0	0	0	0	0	UniRef90_X0T3Y0_Marine_sediment_metagenome_DNA,_contig:_S01H1_L03448_n=1_Tax=marine_sediment_metagenome_RepID=X0T3Y0_9ZZZZ
OG_1097	0.43	3.67	0.5	3.52	2.45	1.17	23.6	24.81	23.87	24.55	17.31	5.98	UniRef90_A0A098S9A8_Uncharacterized_protein_n=2_Tax=Phaeodactylibacter_xiamenensis_RepID=A0A098S9A8_9SPHI
OG_10970	0	0	0	0.08	0.39	0	0	0	0	0	0	0	UniRef90_D6PHU8_Putative_uncharacterized_protein_n=1_Tax=uncultured_phage_MedDCM-OCT-S05-C139_RepID=D6PHU8_9VIRU
OG_10971	0	0	0	0.08	0	0	0	0	0	0	0	0	UniRef90_M4AZE1_Uncharacterized_protein_n=1_Tax=Xiphophorus_maculatus_RepID=M4AZE1_XIPMA
OG_10972	0	0	0	0	0	0	0	0	0	0	0	0	UniRef90_I7F2K8_Serine_protease-like_protein_n=8_Tax=Phaeobacter_RepID=I7F2K8_PHAIB
OG_10973	0.14	0	0.84	0	0	0	0	0	0	0	0	0	UniRef90_G9EQF2_Putative_uncharacterized_protein_n=1_Tax=Legionella_drancourtii_LLAP12_RepID=G9EQF2_9GAMM
OG_10974	0	0	0	0	0	0	0	0	0	0	0	0	UniRef90_D0LLS6_Putative_phage_late_control_gene_D_protein_n=2_Tax=Haliangium_ochraceum_(strain_DSM_14365_/_JCM_11303_/_SMP-2)_RepID=D0LLS6_HALO1
OG_10975	0	0	0.17	0	0	0	0	0	0	0	0	0	UniRef90_A0A0A6PJ57_Tail_protein_n=2_Tax=Candidatus_Thiomargarita_nelsonii_RepID=A0A0A6PJ57_9GAMM
OG_10976	0	0	0	0	0	0	0	0	0	0	0	0	UniRef90_UPI000400C0B9_alkylhydroperoxidase_n=1_Tax=Azospirillum_halopraeferens_RepID=UPI000400C0B9
OG_10977	0	0	0.34	0	0	0	0	0	0	0	0	0	UniRef90_A6FTZ1_Lipoprotein,_putative_n=2_Tax=Roseobacter_sp._AzwK-3b_RepID=A6FTZ1_9RHOB
OG_10978	0.05	0	0	0	0	0	0	0	0	0	0	0
OG_10979	0.05	0	0	0	0	0	0	0	0	0	0	0	UniRef90_A0A0C1GUS0_Antibiotic_biosynthesis_monooxygenase_n=1_Tax=Ruegeria_sp._ANG-R_RepID=A0A0C1GUS0_9RHOB
OG_1098	1.9	6.31	1.34	1.84	2.58	1.17	332.64	385.46	186.05	176.89	172.36	71.59	UniRef90_Q10VG2_NAD(P)H-quinone_oxidoreductase_subunit_H_n=1_Tax=Trichodesmium_erythraeum_(strain_IMS101)_RepID=NDHH_TRIEI
OG_10980	0	0	0	0	0	0	0	0	0	0	0	0	UniRef90_D0LLR2_D12_class_N6_adenine-specific_DNA_methyltransferase_n=1_Tax=Haliangium_ochraceum_(strain_DSM_14365_/_JCM_11303_/_SMP-2)_RepID=D0LLR2_HALO1
OG_10981	0	0	0	0	0	0	0	0	0	0	0	0	UniRef90_UPI00036194CF_hypothetical_protein_n=1_Tax=Lamprocystis_purpurea_RepID=UPI00036194CF
OG_10982	0	0	0	0	0	0	0	0	0	0	0	0	UniRef90_A0A0C1GEK4_Membrane_protein_n=1_Tax=Ruegeria_sp._ANG-R_RepID=A0A0C1GEK4_9RHOB
OG_10983	0	0	0	0	0	0	0	0	0	0	0	0	UniRef90_C9CXM9_Thioesterase_family_protein_n=3_Tax=Ruegeria_RepID=C9CXM9_9RHOB
OG_10984	0.05	0	0	0	0	0	0	0	0	0	0	0
OG_10985	0.71	0	1.51	0	0	0	0	0	0	0	0	0	UniRef90_UPI000368EE12_hypothetical_protein_n=1_Tax=Thiobacillus_denitrificans_RepID=UPI000368EE12
OG_10986	0.52	0	0	0	0	0	0	0	0	0	0	0	UniRef90_F3E7D3_Uncharacterized_protein_n=1_Tax=Pseudomonas_amygdali_pv._lachrymans_str._M301315_RepID=F3E7D3_PSEAV
OG_10987	0	0	0	0	0	0	0	0	0	0	0	0
OG_10988	0.09	0	0	0	0	0	0	0	0	0	0	0
OG_10989	0	0	0	0	0	0	0	0	0	0	0	0	UniRef90_A0A0J1CSS9_Uncharacterized_protein_n=1_Tax=Burkholderia_glathei_PML1(12)_RepID=A0A0J1CSS9_9BURK
OG_1099	0.14	1.61	0.17	0.64	0.52	0.58	111.4	138.12	123.53	27.83	36.7	9.33	UniRef90_A0A098S056_5'-nucleotidase_SurE_n=1_Tax=Phaeodactylibacter_xiamenensis_RepID=A0A098S056_9SPHI
OG_10990	0	0	0	0	0	0	0	0	0	0	0	0	UniRef90_G8AIH8_Putative_response_regulator_with_a_CheY-like_receiver_domain_n=3_Tax=Azospirillum_brasilense_RepID=G8AIH8_AZOBR
OG_10991	0	0	0	0	0	0	0	0	0	0	0	0	UniRef90_J0QHE9_Uncharacterized_protein_n=1_Tax=Bartonella_doshiae_NCTC_12862_=_ATCC_700133_RepID=J0QHE9_BARDO
OG_10992	0	0.15	0	0	0	0	0	0	0	0	0	0	UniRef90_A0A090DZV1_Major_facilitator_family_transporter_n=1_Tax=Mesorhizobium_sp._ORS3324_RepID=A0A090DZV1_9RHIZ
OG_10993	0	0	0	0	0	0	0	0	0	0	0	0	UniRef90_A6FNX5_Phage_major_tail_protein,_TP901-1_n=5_Tax=Rhodobacteraceae_RepID=A6FNX5_9RHOB
OG_10994	0.09	0	0.17	0	0	0	0	0	0	0	0	0	UniRef90_Q1DB87_Conserved_domain_protein_n=10_Tax=Cystobacterineae_RepID=Q1DB87_MYXXD
OG_10995	0.05	0	0.17	0	0	0	0	0	0	0	0	0	UniRef90_UPI00035E26BF_hypothetical_protein_n=1_Tax=Thiobacillus_denitrificans_RepID=UPI00035E26BF
OG_10996	0.66	0	0.67	0	0	0	0	0	0	0	0	0	UniRef90_A0A061QET7_Hpt_domain_protein_n=1_Tax=alpha_proteobacterium_Q-1_RepID=A0A061QET7_9PROT
OG_10997	0.05	0	0	0	0	0	0	0	0	0	0	0	UniRef90_UPI0003F76228_hypothetical_protein_n=1_Tax=Azospirillum_halopraeferens_RepID=UPI0003F76228
OG_10998	0	0	0	0	0	0	0	0	0	0	0	0
OG_10999	0	0	0	0	0	0	0	0	0	0	0	0
OG_11	5.59	6.31	12.94	27.19	20.16	10.5	0	0	0	0	0	0	UniRef90_A0A098RZ46_Uncharacterized_protein_n=1_Tax=Phaeodactylibacter_xiamenensis_RepID=A0A098RZ46_9SPHI
OG_110	0.09	0	0	0	0	0	38.9	21.24	93.57	18.63	26.78	7.14	UniRef90_Q10V90_Transposase,_IS4_family_n=3_Tax=Trichodesmium_erythraeum_RepID=Q10V90_TRIEI
OG_1100	134.68	15.86	56.98	65.25	133.98	49.08	145992	8972.91	50494.1	81988.1	101638	33768.8	UniRef90_F5UHU4_Photosynthetic_reaction_centre_protein_(Fragment)_n=1_Tax=Microcoleus_vaginatus_FGP-2_RepID=F5UHU4_9CYAN
OG_11000	0.05	0	0	0	0	0	0	0	0	0	0	0	UniRef90_A0A0D2VPY7_Uncharacterized_protein_n=1_Tax=Skermanella_aerolata_KACC_11604_RepID=A0A0D2VPY7_9PROT
OG_11001	0	0	0	0.16	0	0	0	0	0	0	0	0	UniRef90_UPI0006A64920_hypothetical_protein_n=1_Tax=Escherichia_coli_RepID=UPI0006A64920
OG_11002	0	0	0	1.36	1.29	0	0	0	0	0	0	0	UniRef90_A0A0F9FW74_Uncharacterized_protein_n=1_Tax=marine_sediment_metagenome_RepID=A0A0F9FW74_9ZZZZ
OG_11003	0	0	0	0	0	0	0	0	0	0	0	0	UniRef90_E3SPQ9_Putative_uncharacterized_protein_n=2_Tax=Caudovirales_RepID=E3SPQ9_9CAUD
OG_11004	0	0	0	0	0.13	0	0	0	0	0	0	0	UniRef90_E3SIQ6_Baseplate_hub_subunit_n=1_Tax=Synechococcus_phage_S-SM2_RepID=E3SIQ6_9CAUD
OG_11005	0	0	0	0	0	0	0	0	0	0	0	0	UniRef90_K7XRV7_Uncharacterized_protein_n=1_Tax=uncultured_Mediterranean_phage_MEDS1_group_RepID=K7XRV7_9VIRU
OG_11006	0	0	0	0	0	0	0	0	0	0	0	0	UniRef90_M4QPM4_Uncharacterized_protein_n=1_Tax=Synechococcus_phage_S-SKS1_RepID=M4QPM4_9CAUD
OG_11007	0	0	0	0	0	0	0	0	0	0	0	0	UniRef90_D6PI82_Putative_uncharacterized_protein_n=1_Tax=uncultured_phage_MedDCM-OCT-S08-C1281_RepID=D6PI82_9VIRU
OG_11008	0	0	0	0	0	0	0	0	0	0	0	0	UniRef90_A0A0E3EX23_Uncharacterized_protein_n=1_Tax=Synechococcus_phage_ACG-2014b_RepID=A0A0E3EX23_9CAUD
OG_11009	0	0	0	0	0.26	0	0	0	0	0	0	0
OG_1101	0	3.67	0	0.4	0.39	0	0	0.15	0	0	0	0	UniRef90_A0A016SC70_Uncharacterized_protein_n=1_Tax=Ancylostoma_ceylanicum_RepID=A0A016SC70_9BILA
OG_11010	0	0	0	0	0	0	0	0	0	0	0	0	UniRef90_E3SJ05_Putative_uncharacterized_protein_n=1_Tax=Synechococcus_phage_S-SM2_RepID=E3SJ05_9CAUD
OG_11011	0	0	0	0.08	0	0	0	0	0	0	0	0	UniRef90_E3SIE4_Putative_uncharacterized_protein_n=1_Tax=Synechococcus_phage_S-SM1_RepID=E3SIE4_9CAUD
OG_11012	0	0	0	0	0	0	0	0	0	0	0	0	UniRef90_M4QPL4_Uncharacterized_protein_n=1_Tax=Synechococcus_phage_S-SKS1_RepID=M4QPL4_9CAUD
OG_11013	0	0	0	0	0	0	0	0	0	0	0	0	UniRef90_E3SJ57_Putative_uncharacterized_protein_n=1_Tax=Synechococcus_phage_S-SM2_RepID=E3SJ57_9CAUD
OG_11014	0	0	0	0.4	0	0.15	0	0	0	0	0	0
OG_11015	0	0	0	0.56	0.26	0	0	0	0	0	0	0
OG_11016	0	0	0	0	0.26	0	0	0	0	0	0	0
OG_11017	0	0	0	0	0	0	0	0	0	0	0	0
OG_11018	0	0	0	0	0	0	0	0	0	0	0	0	UniRef90_UPI0003B498F6_short-chain_dehydrogenase_n=1_Tax=Spongiibacter_tropicus_RepID=UPI0003B498F6
OG_11019	0	0	0	0	0	0	0	0	0	0	0	0
OG_1102	0.14	1.32	1.01	1.04	1.55	0.58	76.38	95.7	62.69	41.58	44.06	10.64	UniRef90_A0A098SA44_Amino_acid_permease_n=1_Tax=Phaeodactylibacter_xiamenensis_RepID=A0A098SA44_9SPHI
OG_11020	0	0	0	0	0	0	0	0	0	0	0	0	UniRef90_A0A0A1UEY8_Uncharacterized_protein_n=1_Tax=Entamoeba_invadens_IP1_RepID=A0A0A1UEY8_ENTIV
OG_11021	0	0	0	0.16	0.26	0.15	0	0	0	0	0	0
OG_11022							6.82	8.37	9.24	4.4	3.49	0.58	UniRef90_A0YLG9_N5-carboxyethyl-ornithine_synthase_n=1_Tax=Lyngbya_sp._(strain_PCC_8106)_RepID=A0YLG9_LYNSP
OG_11023							0.57	0	0.67	0.72	0.39	0	UniRef90_Q112Q3_AAA_ATPase,_central_region_n=1_Tax=Trichodesmium_erythraeum_(strain_IMS101)_RepID=Q112Q3_TRIEI
OG_11024							132.77	16.44	62.52	20.15	62.15	27.55	UniRef90_UPI00035EB660_hypothetical_protein_n=1_Tax=Oscillatoria_sp._PCC_10802_RepID=UPI00035EB660
OG_11025							4.18	0.29	1.51	0.24	1.55	0.15
OG_11026							1.14	317.2	47.73	43.5	134.25	25.37	UniRef90_E0UKZ1_Alkanesulfonate_monooxygenase_n=1_Tax=Cyanothece_sp._(strain_PCC_7822)_RepID=E0UKZ1_CYAP2
OG_11027							0	0	0	0.16	0	0.15	UniRef90_UPI0004627AE7_PREDICTED:_uncharacterized_protein_LOC103279368_n=1_Tax=Anolis_carolinensis_RepID=UPI0004627AE7
OG_11028							0.14	4.84	0.34	4.08	9.82	0.73	UniRef90_B1WU20_Uncharacterized_protein_n=1_Tax=Cyanothece_sp._(strain_ATCC_51142)_RepID=B1WU20_CYAA5
OG_11029							1.37	1.61	0.34	1.12	1.03	0.44	UniRef90_UPI00034C315B_hypothetical_protein_n=1_Tax=Synechococcus_sp._PCC_7336_RepID=UPI00034C315B
OG_1103	0.14	1.03	0.5	0.8	1.16	0	334.68	464.28	202.02	269.5	232.83	63.13	UniRef90_Q10YQ3_Biotin_synthase_n=1_Tax=Trichodesmium_erythraeum_(strain_IMS101)_RepID=BIOB_TRIEI
OG_11030							1.37	0.44	3.87	0.64	1.42	0.44	UniRef90_L8LKF6_Uncharacterized_protein_n=1_Tax=Gloeocapsa_sp._PCC_73106_RepID=L8LKF6_9CHRO
OG_11031							0.38	0.73	1.34	0.32	0.78	0.29	UniRef90_UPI0003482BEB_hypothetical_protein_n=1_Tax=Synechococcus_sp._PCC_7336_RepID=UPI0003482BEB
OG_11032							3.7	3.23	2.35	1.92	3.75	0.29	UniRef90_UPI000348A164_hypothetical_protein_n=1_Tax=Synechococcus_sp._PCC_7336_RepID=UPI000348A164
OG_11033							0.9	0.73	1.18	1.36	2.97	0.73	UniRef90_L8LIG6_Uncharacterized_protein_n=1_Tax=Gloeocapsa_sp._PCC_73106_RepID=L8LIG6_9CHRO
OG_11034							13.36	13.65	22.02	2.08	7.49	1.6	UniRef90_B4W5D4_O-Antigen_Polymerase_family_n=1_Tax=Coleofasciculus_chthonoplastes_PCC_7420_RepID=B4W5D4_9CYAN
OG_11035							19.71	23.93	22.86	4.24	10.47	2.77	UniRef90_K9TIC0_Methylase_involved_in_ubiquinone/menaquinone_biosynthesis_n=1_Tax=Oscillatoria_acuminata_PCC_6304_RepID=K9TIC0_9CYAN
OG_11036							4.12	3.08	1.51	1.84	4.01	1.31	UniRef90_K9Q4M9_Cyclic_nucleotide-binding_protein_n=1_Tax=Leptolyngbya_sp._PCC_7376_RepID=K9Q4M9_9CYAN
OG_11037							16.73	23.05	18.66	5.76	9.82	3.21	UniRef90_E0UJE2_Serine/threonine-protein_kinase-like_domain_protein_n=1_Tax=Cyanothece_sp._(strain_PCC_7822)_RepID=E0UJE2_CYAP2
OG_11038							6.92	368.72	88.07	30.47	49.87	21.58	UniRef90_B7K1Z8_Uncharacterized_protein_n=1_Tax=Cyanothece_sp._(strain_PCC_8801)_RepID=B7K1Z8_CYAP8
OG_11039							2.46	0.59	0.17	0.4	0.52	0	UniRef90_E0UL64_Short-chain_dehydrogenase/reductase_SDR_n=1_Tax=Cyanothece_sp._(strain_PCC_7822)_RepID=E0UL64_CYAP2
OG_1104	0.14	0	1.01	0.8	0.13	0	0.71	24.07	43.03	62.86	27.52	10.5	UniRef90_B8KF63_Beta-lactamase_n=2_Tax=gamma_proteobacterium_NOR5-3_RepID=B8KF63_9GAMM
OG_11040							7.91	5.72	8.07	2	4.01	2.19	UniRef90_L8P0Z3_Glycosyl_transferases_group_1_family_protein_n=18_Tax=Microcystis_RepID=L8P0Z3_MICAE
OG_11041	0	0	0	0.08	0	0.29	0	0	0	0	0	0	UniRef90_UPI00036FF929_hypothetical_protein_n=1_Tax=Balneola_vulgaris_RepID=UPI00036FF929
OG_11042							0	0	3.19	0	0	0	UniRef90_B4VP04_Putative_uncharacterized_protein_n=1_Tax=Coleofasciculus_chthonoplastes_PCC_7420_RepID=B4VP04_9CYAN
OG_11043							4.74	1.76	6.39	1.68	4.65	0.87	UniRef90_F5UFW2_Uncharacterized_protein_n=1_Tax=Microcoleus_vaginatus_FGP-2_RepID=F5UFW2_9CYAN
OG_11044							0.09	0.15	0	0.08	0.13	0
OG_11045							0	0	0	0.08	0.13	0
OG_11046							5.16	13.06	8.07	93	38.5	11.66	UniRef90_A0A073CCH3_Glycosyl_transferase_family_2_n=1_Tax=Planktothrix_agardhii_NIVA-CYA_126/8_RepID=A0A073CCH3_PLAAG
OG_11047							0.19	0.29	0.67	0.56	0.26	0.44	UniRef90_L8LNA1_Putative_membrane_protein_n=1_Tax=Gloeocapsa_sp._PCC_73106_RepID=L8LNA1_9CHRO
OG_11048							3.17	1.61	1.18	2	2.58	0.73
OG_11049							0.57	2.94	0.34	9.04	7.24	2.48	UniRef90_Q115S1_Uncharacterized_protein_n=2_Tax=Trichodesmium_erythraeum_RepID=Q115S1_TRIEI
OG_1105	0.95	7.49	2.02	3.04	4.39	2.62	178.97	182.16	115.63	271.02	201.05	74.79	UniRef90_A0A098RYT4_50S_ribosomal_protein_L9_n=2_Tax=Bacteria_RepID=A0A098RYT4_9SPHI
OG_11050							1.94	2.2	0.84	3.6	3.1	0.87	UniRef90_Q115S0_Uncharacterized_protein_n=1_Tax=Trichodesmium_erythraeum_(strain_IMS101)_RepID=Q115S0_TRIEI
OG_11051							0	0	0	0	0	0
OG_11052							0.09	1.03	0.17	0.4	0	0	UniRef90_K9WLX5_Uncharacterized_protein_n=1_Tax=Microcoleus_sp._PCC_7113_RepID=K9WLX5_9CYAN
OG_11053							0.19	1.03	0.5	1.12	2.07	0.87
OG_11054	1.61	0.88	0.17	0	0.26	0	6.07	0.44	1.68	0.48	1.16	0.44	UniRef90_H8NTW8_Ornithine_aminotransferase_n=1_Tax=Rahnella_aquatilis_HX2_RepID=H8NTW8_RAHAQ
OG_11055	0	0	0	0.08	0	0	0	0	0	0	0	0	UniRef90_UPI0003705F43_T9SS_C-terminal_target_domain-containing_protein_n=1_Tax=Lewinella_persica_RepID=UPI0003705F43
OG_11056							10	0.29	0.67	0.48	1.29	0.29	UniRef90_Q6E7K4_Acyl_carrier_protein_n=1_Tax=Lyngbya_majuscula_RepID=Q6E7K4_9CYAN
OG_11057							1.14	2.2	0.67	4.96	3.1	0.29	UniRef90_Q10Z82_Uncharacterized_protein_n=1_Tax=Trichodesmium_erythraeum_(strain_IMS101)_RepID=Q10Z82_TRIEI
OG_11058							1.18	9.69	4.54	2	5.81	1.31	UniRef90_K9R9X3_LysM_domain-containing_protein_n=1_Tax=Rivularia_sp._PCC_7116_RepID=K9R9X3_9CYAN
OG_11059							0	0	0.5	0	0.13	0	UniRef90_B2IZI7_Rhs_element_Vgr_protein_n=1_Tax=Nostoc_punctiforme_(strain_ATCC_29133_/_PCC_73102)_RepID=B2IZI7_NOSP7
OG_1106	0.28	1.76	0.5	0.48	1.03	0.44	2.04	18.64	16.47	13.35	8.79	2.33	UniRef90_F4L6F5_Dihydroorotase_n=1_Tax=Haliscomenobacter_hydrossis_(strain_ATCC_27775_/_DSM_1100_/_LMG_10767_/_O)_RepID=F4L6F5_HALH1
OG_11060							1.75	1.32	1.01	0.48	1.16	0
OG_11061							0.38	0.17	0.17	0	0.26	0
OG_11062							2.7	34.2	22.86	7.12	23.13	4.81	UniRef90_B2IZI4_Uncharacterized_protein_n=1_Tax=Nostoc_punctiforme_(strain_ATCC_29133_/_PCC_73102)_RepID=B2IZI4_NOSP7
OG_11063							0.52	1.32	0.34	0.24	0.26	0.29	UniRef90_Q10WY3_Anaerobic_ribonucleoside-triphosphate_reductase_activating_protein_n=1_Tax=Trichodesmium_erythraeum_(strain_IMS101)_RepID=Q10WY3_TRIEI
OG_11064							0.76	0.88	3.36	0.32	0.65	0	UniRef90_K9V4Y8_Uncharacterized_protein_n=1_Tax=Calothrix_sp._PCC_6303_RepID=K9V4Y8_9CYAN
OG_11065							1.33	0.29	0.17	0.08	0.26	0
OG_11066							0	0	0	0	0	0
OG_11067							2.94	1.67	2.25	0.15	1.79	0.57	UniRef90_B4VV27_Putative_uncharacterized_protein_n=1_Tax=Coleofasciculus_chthonoplastes_PCC_7420_RepID=B4VV27_9CYAN
OG_11068							0.76	0	0.17	0	0.13	0.15
OG_11069							40.04	13.65	18.15	33.35	23.77	13.12	UniRef90_UPI00063F0FCB_hypothetical_protein_n=1_Tax=Trichodesmium_erythraeum_RepID=UPI00063F0FCB
OG_1107	0	0	0	0	0	0	0	0	0	0	0	0
OG_11070							0	0.15	0	0.16	0.26	0	UniRef90_UPI000312CB4F_hypothetical_protein_n=1_Tax=Trichodesmium_erythraeum_RepID=UPI000312CB4F
OG_11071							36.72	20.7	18.15	10.08	12.02	5.39	UniRef90_I4H9G2_Uncharacterized_protein_n=2_Tax=Microcystis_aeruginosa_RepID=I4H9G2_MICAE
OG_11072							34.97	20.84	18.15	8.08	10.08	3.64	UniRef90_I4H9G2_Uncharacterized_protein_n=2_Tax=Microcystis_aeruginosa_RepID=I4H9G2_MICAE
OG_11073							11.28	1.91	3.36	2.88	3.62	0.15
OG_11074							73.76	14.83	25.21	7.6	14.86	6.56	UniRef90_L8N3F3_Peptidase_S8_and_S53_subtilisin_kexin_sedolisin_n=1_Tax=Pseudanabaena_biceps_PCC_7429_RepID=L8N3F3_9CYAN
OG_11075							7.3	19.67	13.45	1.52	3.88	0.87	UniRef90_K9TIR3_Glycosyltransferase_n=2_Tax=Oscillatoria_acuminata_RepID=K9TIR3_9CYAN
OG_11076	0	0	0	0	0.13	0	0	0.44	0	0	0.13	0.15	UniRef90_F4XWE3_Putative_uncharacterized_protein_n=1_Tax=Moorea_producens_3L_RepID=F4XWE3_9CYAN
OG_11077	0	0	0	0	0	0	0.81	1.03	1.68	0	0.52	0	UniRef90_A1ZEC5_Uncharacterized_protein_n=1_Tax=Microscilla_marina_ATCC_23134_RepID=A1ZEC5_9BACT
OG_11078							1.8	0.44	1.68	1.44	3.62	0.29	UniRef90_L8M7F9_Uncharacterized_protein_n=1_Tax=Xenococcus_sp._PCC_7305_RepID=L8M7F9_9CYAN
OG_11079							0	2.05	0	1.76	0	1.31
OG_1108	0.14	1.76	0.34	0.4	0.65	0	80.65	58.13	66.89	136.83	93.16	32.37	UniRef90_Q116A0_ABC_transporter_related_n=3_Tax=Trichodesmium_erythraeum_RepID=Q116A0_TRIEI
OG_11080							13.93	112.58	12.1	33.91	28.81	6.85	UniRef90_Q10XL8_PEP_motif_putative_anchor-like_n=1_Tax=Trichodesmium_erythraeum_(strain_IMS101)_RepID=Q10XL8_TRIEI
OG_11081							2.32	1.76	2.02	1.36	2.2	0.44	UniRef90_UPI0006AC34B9_hypothetical_protein_n=1_Tax=unknown_RepID=UPI0006AC34B9
OG_11082							0	12.62	10.25	0	0.39	0.15	UniRef90_Q68RS7_Putative_uncharacterized_protein_(Fragment)_n=1_Tax=Prochloron_didemni_RepID=Q68RS7_PRODI
OG_11083	0.05	0.15	0	0.24	0	0	0.28	0.44	0	0.08	0.52	0	UniRef90_Q2GCJ4_Uncharacterized_protein_n=2_Tax=Neorickettsia_RepID=Q2GCJ4_NEOSM
OG_11084							0.95	2.2	0.17	0.16	0.78	0.15	UniRef90_K9TFA8_XisI_protein_n=1_Tax=Oscillatoria_acuminata_PCC_6304_RepID=K9TFA8_9CYAN
OG_11085							0.52	1.91	0.67	0.72	2.58	0	UniRef90_Q118J3_Uncharacterized_protein_n=1_Tax=Trichodesmium_erythraeum_(strain_IMS101)_RepID=Q118J3_TRIEI
OG_11086							0.05	0.15	0	0.88	0.52	0	UniRef90_Q118D5_GTP_cyclohydrolase_II_domain_protein_n=2_Tax=Trichodesmium_erythraeum_RepID=Q118D5_TRIEI
OG_11087							5.16	1.91	3.03	0.96	2.58	0.29	UniRef90_S3JF33_Uncharacterized_protein_n=2_Tax=Microcystis_aeruginosa_RepID=S3JF33_MICAE
OG_11088							0.14	1.76	2.02	5.28	1.94	1.02	UniRef90_Q113M4_Uncharacterized_protein_n=2_Tax=Trichodesmium_erythraeum_RepID=Q113M4_TRIEI
OG_11089							0.47	0	2.69	0.16	0.39	0.15
OG_1109	0	0.44	0.17	0.48	0.13	0.29	22.7	17.03	16.47	11.84	15.63	4.81	UniRef90_UPI000364C9D0_hypothetical_protein_n=1_Tax=Lewinella_cohaerens_RepID=UPI000364C9D0
OG_11090							0.24	0.73	0	0.32	0.9	0.29	UniRef90_UPI0002F496D2_hypothetical_protein_n=1_Tax=Fischerella_muscicola_RepID=UPI0002F496D2
OG_11091							2.7	1.91	6.39	0.16	0.52	0	UniRef90_A0A0D6K9W1_Uncharacterized_protein_n=1_Tax=Tolypothrix_sp._PCC_7601_RepID=A0A0D6K9W1_9CYAN
OG_11092	0	0	0	0	0	0	0.05	30.82	1.51	2.96	2.07	0.58	UniRef90_A0A0D6JBN5_Uncharacterized_protein_n=2_Tax=Candidatus_Filomicrobium_marinum_RepID=A0A0D6JBN5_9RHIZ
OG_11093							2.13	1.03	1.51	0.4	0	0	UniRef90_UPI0003470BF3_hypothetical_protein_n=1_Tax=Scytonema_hofmanni_RepID=UPI0003470BF3
OG_11094							0	0	0	0	0	0	UniRef90_UPI00017E2F56_hypothetical_protein_n=1_Tax=Cyanothece_sp._(strain_PCC_7822)_RepID=UPI00017E2F56
OG_11095							0	0	0	0	0.13	0	UniRef90_K9VH74_Cytosine-specific_methyltransferase_n=2_Tax=Oscillatoria_RepID=K9VH74_9CYAN
OG_11096							11.04	16.29	2.35	2.4	6.72	1.6	UniRef90_A0A098TQ50_Uncharacterized_protein_n=2_Tax=Neosynechococcus_RepID=A0A098TQ50_9CHRO
OG_11097	4.31	8.59	11.26	15.86	5.33	12.83	2.61	1070.27	264.87	204.7	699.5	1744.42	UniRef90_B8CEF3_rRNA_intron-encoded_homing_endonuclease_(Fragment)_n=1_Tax=Thalassiosira_pseudonana_RepID=B8CEF3_THAPS
OG_11098							0.24	2.2	1.18	1.12	0.52	0.15	UniRef90_Q10WY4_Uncharacterized_protein_n=2_Tax=Trichodesmium_erythraeum_RepID=Q10WY4_TRIEI
OG_11099							0.09	1.03	0.67	0.64	0.26	0.29
OG_111	0.95	3.82	0.34	2.88	2.71	0.73	0	0	0	0	0	0	UniRef90_UPI00069665C9_hypothetical_protein_n=1_Tax=Phaeodactylibacter_xiamenensis_RepID=UPI00069665C9
OG_1110	0.38	0.59	0.34	0.4	0.65	0.29	561.23	760.2	234.79	101.88	162.93	46.65	UniRef90_A0A098S1E2_NAD(P)_transhydrogenase_subunit_alpha_n=2_Tax=Bacteria_RepID=A0A098S1E2_9SPHI
OG_11100							0.05	2.64	0.5	0.08	0.13	0
OG_11101							59.18	67.08	74.29	12	53.36	17.93	UniRef90_A0A0C1MPP0_Uncharacterized_protein_n=1_Tax=Pseudoalteromonas_luteoviolacea_RepID=A0A0C1MPP0_9GAMM
OG_11102							2.84	0.73	3.19	0.56	1.03	0.44	UniRef90_T2JFT6_Uncharacterized_protein_n=5_Tax=Crocosphaera_watsonii_RepID=T2JFT6_CROWT
OG_11103							0.19	4.7	0.5	7.2	5.04	1.75	UniRef90_Q111S9_Uncharacterized_protein_n=1_Tax=Trichodesmium_erythraeum_(strain_IMS101)_RepID=Q111S9_TRIEI
OG_11104	0	0.29	0	0.56	0.13	0.15	0	0	0	0	0	0	UniRef90_Q5E8G4_Glycosyltransferase_n=2_Tax=Aliivibrio_fischeri_RepID=Q5E8G4_VIBF1
OG_11105							30.61	13.8	4.54	1.28	1.94	0.73	UniRef90_UPI000346EC31_hypothetical_protein_n=1_Tax=Oscillatoria_sp._PCC_10802_RepID=UPI000346EC31
OG_11106							0.14	0	0	0	0	0.15	UniRef90_Q110Q4_Uncharacterized_protein_n=1_Tax=Trichodesmium_erythraeum_(strain_IMS101)_RepID=Q110Q4_TRIEI
OG_11107							0.52	0.44	0.67	0.08	0.13	0.29
OG_11108							1.94	2.5	1.01	0.72	1.29	0.29
OG_11109							13.13	6.61	5.04	0	0	0
OG_1111	0.05	0.15	0	0.4	0.52	0.29	24.74	35.23	15.8	20.07	15.25	3.79	UniRef90_A0A098SFB1_N5-carboxyaminoimidazole_ribonucleotide_mutase_n=2_Tax=Bacteria_RepID=A0A098SFB1_9SPHI
OG_11110							0	0.15	0	0	0.13	0
OG_11111							0	0	0	0	0.39	0	UniRef90_F4XWU6_Putative_uncharacterized_protein_n=1_Tax=Moorea_producens_3L_RepID=F4XWU6_9CYAN
OG_11112							0	3.82	0	0.56	1.42	0.15	UniRef90_F4XWU7_Putative_RNA_polymerase_sigma_factor_n=1_Tax=Moorea_producens_3L_RepID=F4XWU7_9CYAN
OG_11113							0	0	0	0	0	0	UniRef90_F4Y1P5_Putative_uncharacterized_protein_n=1_Tax=Moorea_producens_3L_RepID=F4Y1P5_9CYAN
OG_11114							0	0	0	0	0	0
OG_11115							0.72	0	0.17	0.08	0.13	0	UniRef90_A8UZY7_Diguanylate_cyclase/phosphodiesterase_(GGDEF_&_EAL_domains)_(Fragment)_n=1_Tax=Hydrogenivirga_sp._128-5-R1-1_RepID=A8UZY7_9AQUI
OG_11116							19.43	6.61	0	0.48	7.11	2.33	UniRef90_A0A0D0NDA5_Kitasatospora_griseola_strain_MF730-N6_RKJC_1,_whole_genome_shotgun_sequence_n=1_Tax=Kitasatospora_griseola_RepID=A0A0D0NDA5_KITGR
OG_11117							9.48	3.82	5.38	1.6	5.43	1.02	UniRef90_K9SSF9_Putative_low-complexity_protein_n=1_Tax=Synechococcus_sp._PCC_7502_RepID=K9SSF9_9SYNE
OG_11118							0.71	0.29	0.34	0.08	0	0.15
OG_11119							260.18	59.3	89.41	17.75	44.71	8.46	UniRef90_G5IYS2_Transposase,_IS607_family_n=7_Tax=Crocosphaera_watsonii_RepID=G5IYS2_CROWT
OG_1112	0.47	0.15	0.17	0.4	0.78	0.29	2.37	7.78	5.38	37.75	21.32	7.73	UniRef90_A0A098S8W8_Phosphoribosylglycinamide_formyltransferase_n=1_Tax=Phaeodactylibacter_xiamenensis_RepID=A0A098S8W8_9SPHI
OG_11120							0	1.76	0	0.96	0	0.44
OG_11121							0	0	0	0	0	0
OG_11122							8.86	8.66	5.38	18.15	13.05	4.37	UniRef90_UPI00063F49E7_hypothetical_protein_n=1_Tax=Trichodesmium_erythraeum_RepID=UPI00063F49E7
OG_11123							0.14	0.44	0.17	0.56	1.03	0.73
OG_11124							0	0.15	0	0.24	0	0
OG_11125							0	0.44	0	0.16	0	0.15
OG_11126							4.12	3.82	2.35	0.88	1.81	0.29
OG_11127							1.08	0.68	0.18	0	0.13	0
OG_11128							193.38	23.93	1.85	3.44	10.6	1.75
OG_11129							0.71	2.64	0	1.2	5.56	1.02	UniRef90_B2IZI9_Uncharacterized_protein_n=1_Tax=Nostoc_punctiforme_(strain_ATCC_29133_/_PCC_73102)_RepID=B2IZI9_NOSP7
OG_1113	0.14	0.73	0.34	0.4	0.26	0	16.16	16.73	22.69	35.59	25.32	3.94	UniRef90_F4KSY8_rRNA_(Guanine-N(2)-)-methyltransferase_n=1_Tax=Haliscomenobacter_hydrossis_(strain_ATCC_27775_/_DSM_1100_/_LMG_10767_/_O)_RepID=F4KSY8_HALH1
OG_11130							1.75	7.05	3.03	2.56	8.01	1.17	UniRef90_K9R9R8_Phage_baseplate_assembly_protein_W_n=1_Tax=Rivularia_sp._PCC_7116_RepID=K9R9R8_9CYAN
OG_11131							0	0	0	0	0	0
OG_11132							4.79	0.29	1.01	0.72	1.55	0.44
OG_11133							1.94	0	1.34	0.16	0.39	0.58	UniRef90_A0A0C2Q2Z1_Transcriptional_regulator_n=1_Tax=Tolypothrix_campylonemoides_VB511288_RepID=A0A0C2Q2Z1_9CYAN
OG_11134							0.09	0.59	0	0.08	0.26	0.15	UniRef90_I4IBK5_Uncharacterized_aminotransferase_yodT_n=4_Tax=Microcystis_RepID=I4IBK5_9CHRO
OG_11135	0.05	0	0.17	0	0	0	11.8	3.08	2.86	0.08	0.52	0.29	UniRef90_A1ZFQ0_Uncharacterized_protein_n=1_Tax=Microscilla_marina_ATCC_23134_RepID=A1ZFQ0_9BACT
OG_11136	0.09	13.94	0.5	0	0.13	0	16.92	193.17	38.66	3.12	4.65	0.73	UniRef90_B7JXD5_Peroxidase_n=2_Tax=Cyanothece_RepID=B7JXD5_CYAP8
OG_11137							0.52	4.84	2.52	1.44	4.65	0.58
OG_11138							0.05	1.03	0.34	0.24	0.13	0.15	UniRef90_K9PQL7_Dynamin_family_protein_n=1_Tax=Calothrix_sp._PCC_7507_RepID=K9PQL7_9CYAN
OG_11139							5.64	64.29	31.09	60.86	86.96	9.77	UniRef90_K9F1P5_Methylase_involved_in_ubiquinone/menaquinone_biosynthesis_n=1_Tax=Leptolyngbya_sp._PCC_7375_RepID=K9F1P5_9CYAN
OG_1114	1.28	0.44	0	0	0.65	0.15	184.99	164.84	144.88	181.45	181.02	55.26	UniRef90_Q119E5_1-deoxy-D-xylulose_5-phosphate_reductoisomerase_n=2_Tax=Trichodesmium_erythraeum_RepID=Q119E5_TRIEI
OG_11140							0.76	1.91	0	0.48	1.03	0.44
OG_11141							0.14	16.29	10.08	0.24	0.9	0.15	UniRef90_Q114Z5_Uncharacterized_protein_n=1_Tax=Trichodesmium_erythraeum_(strain_IMS101)_RepID=Q114Z5_TRIEI
OG_11142							3.7	1.32	1.01	0.8	1.81	0.73
OG_11143							2.23	2.2	6.72	0.8	2.84	0.87	UniRef90_D8FZ84_Putative_Hemolysin-type_calcium-binding_region_protein_n=1_Tax=[Oscillatoria]_sp._PCC_6506_RepID=D8FZ84_9CYAN
OG_11144							0	0.15	15.63	0.24	0	0	UniRef90_A0YLW7_D-hydantoinase_n=3_Tax=Oscillatoriales_RepID=A0YLW7_LYNSP
OG_11145							0	0	0	0	0	0	UniRef90_E0UAI5_Uncharacterized_protein_n=1_Tax=Cyanothece_sp._(strain_PCC_7822)_RepID=E0UAI5_CYAP2
OG_11146							0.09	0	0	0	0	0
OG_11147							0	0	0	0	0	0
OG_11148							0	0.15	0	0	0	0	UniRef90_Q10WW5_Uncharacterized_protein_n=1_Tax=Trichodesmium_erythraeum_(strain_IMS101)_RepID=Q10WW5_TRIEI
OG_11149							0.05	0	0	0	0	0
OG_1115	0.66	1.91	0	1.36	0.78	1.46	2.37	5.28	7.06	8.16	15.12	3.79	UniRef90_A0A098S067_Phosphoheptose_isomerase_n=2_Tax=Phaeodactylibacter_xiamenensis_RepID=A0A098S067_9SPHI
OG_11150							0.43	5.43	0.5	4.72	3.88	0.44	UniRef90_Q111S4_Uncharacterized_protein_n=2_Tax=Trichodesmium_erythraeum_RepID=Q111S4_TRIEI
OG_11151							0.19	0.15	0	0	0	0
OG_11152							1.61	2.79	0.67	0.24	0.9	0	UniRef90_B1XQ84_Uncharacterized_protein_n=1_Tax=Synechococcus_sp._(strain_ATCC_27264_/_PCC_7002_/_PR-6)_RepID=B1XQ84_SYNP2
OG_11153							0.95	26.27	2.52	48.46	33.21	9.77	UniRef90_Q10VJ6_Uncharacterized_protein_n=2_Tax=Trichodesmium_erythraeum_RepID=Q10VJ6_TRIEI
OG_11154							0.05	1.61	2.02	0.16	0.13	0	UniRef90_Q110M8_Uncharacterized_protein_n=1_Tax=Trichodesmium_erythraeum_(strain_IMS101)_RepID=Q110M8_TRIEI
OG_11155							256.21	88.22	100.17	50.7	98.46	41.41
OG_11156							0	0.15	0.34	0	0	0	UniRef90_K9VU83_HEPN_domain_protein_n=1_Tax=Oscillatoria_nigro-viridis_PCC_7112_RepID=K9VU83_9CYAN
OG_11157							0	0	0	0	0	0
OG_11158							0.14	0	0	0	0.26	0	UniRef90_K9WBM8_PAS_domain_S-box_n=1_Tax=Microcoleus_sp._PCC_7113_RepID=K9WBM8_9CYAN
OG_11159							0	0	0	0.08	0	0
OG_1116	0	0.59	0.34	0.56	0.13	0.58	0	0	2.86	0	0	0	UniRef90_UPI0003816DD8_hypothetical_protein_n=1_Tax=Flexithrix_dorotheae_RepID=UPI0003816DD8
OG_11160							0.24	3.08	0	0.8	2.58	0.29	UniRef90_UPI000686C90C_transposase_n=1_Tax=Calothrix_sp._PCC_7103_RepID=UPI000686C90C
OG_11161							0.28	1.17	0.17	0.08	0.39	0	UniRef90_A0A0D6YGQ4_Penicillin-binding_protein_n=3_Tax=Stigonematales_RepID=A0A0D6YGQ4_MASLA
OG_11162							0	0	0	0	0.26	0	UniRef90_T2J5A9_Glutathione_S-transferase_n=6_Tax=Crocosphaera_watsonii_RepID=T2J5A9_CROWT
OG_11163							11.94	33.03	16.64	12.48	9.69	4.37	UniRef90_Q10VM6_Cobalamin_(Vitamin_B12)_biosynthesis_CbiX_protein_n=2_Tax=Trichodesmium_erythraeum_RepID=Q10VM6_TRIEI
OG_11164	2.94	28.62	17.99	5.68	14.73	4.23	6.73	13.65	18.82	10.95	36.7	9.48	UniRef90_K9PKY2_Uncharacterized_protein_n=1_Tax=Calothrix_sp._PCC_7507_RepID=K9PKY2_9CYAN
OG_11165							0	0	0.17	0	0	0
OG_11166							8.39	5.43	2.69	2.16	4.39	0.58
OG_11167							3.51	0.29	0	0	0.13	0
OG_11168	0	0.59	0	0	0	0	12.46	0.59	0.84	1.76	0.13	0	UniRef90_D8G9P6_Putative_uncharacterized_protein_n=1_Tax=[Oscillatoria]_sp._PCC_6506_RepID=D8G9P6_9CYAN
OG_11169							0.19	2.5	0.17	9.04	7.62	0.73
OG_1117	0.09	0.59	0	0.72	0.39	0.15	0	0	0	0	0	0	UniRef90_A0A098S949_2,3,4,5-tetrahydropyridine-2,6-carboxylate_N-succinyltransferase_n=1_Tax=Phaeodactylibacter_xiamenensis_RepID=A0A098S949_9SPHI
OG_11170	0	0	0	0	0	0	0	0	0	0	0	0	UniRef90_A4A7L7_Shikimate_kinase_n=1_Tax=Congregibacter_litoralis_KT71_RepID=A4A7L7_9GAMM
OG_11171							9.48	0.15	7.39	1.04	0.65	0	UniRef90_UPI00063F711D_hypothetical_protein_n=1_Tax=Trichodesmium_erythraeum_RepID=UPI00063F711D
OG_11172							0.05	0	0	0.08	0.13	0
OG_11173							3.6	0.15	5.21	2.08	0.9	1.02	UniRef90_UPI00003CA06F_hypothetical_protein_n=1_Tax=Trichodesmium_erythraeum_RepID=UPI00003CA06F
OG_11174							25.49	1.03	9.58	0.32	0.26	0.15	UniRef90_UPI0003FE4A6A_hypothetical_protein_n=1_Tax=Smithella_sp._ME-1_RepID=UPI0003FE4A6A
OG_11175							4.79	0.29	17.82	0.48	0.39	0.15	UniRef90_A0ZFI8_Very_large_inducible_GTPase-1_n=1_Tax=Nodularia_spumigena_CCY9414_RepID=A0ZFI8_NODSP
OG_11176							32.98	5.58	66.89	2.16	5.94	2.48	UniRef90_A0ZFI8_Very_large_inducible_GTPase-1_n=1_Tax=Nodularia_spumigena_CCY9414_RepID=A0ZFI8_NODSP
OG_11177							0.85	3.82	0	0.24	0.39	0.15
OG_11178							7.39	3.67	5.71	1.92	2.2	0.58	UniRef90_Q119X0_Uncharacterized_protein_n=2_Tax=Trichodesmium_erythraeum_RepID=Q119X0_TRIEI
OG_11179							0	0	0	0	0	0
OG_1118	0.43	0.59	1.01	2.08	1.81	1.17	0	0	0	0	0	0	UniRef90_A0A098SA54_Aldehyde_dehydrogenase_n=2_Tax=Bacteria_RepID=A0A098SA54_9SPHI
OG_11180							0.85	0	0.5	0	0	0	UniRef90_UPI0003455239_hypothetical_protein_n=1_Tax=Geitlerinema_sp._PCC_7105_RepID=UPI0003455239
OG_11181							0.33	0	0	0	0	0
OG_11182							0.24	0.15	0.34	0.16	0.26	0.44
OG_11183							0.05	0	0	0	0	0	UniRef90_UPI000378414F_hypothetical_protein_n=1_Tax=Leptolyngbya_boryana_RepID=UPI000378414F
OG_11184							6.63	0.88	3.87	0.88	0.9	0.15	UniRef90_Q116T1_Uncharacterized_protein_n=2_Tax=Trichodesmium_erythraeum_RepID=Q116T1_TRIEI
OG_11185							10.47	1.17	15.13	4.64	3.62	0.44	UniRef90_Q116T3_Uncharacterized_protein_n=2_Tax=Trichodesmium_erythraeum_RepID=Q116T3_TRIEI
OG_11186							3.74	1.17	1.68	0.24	0.52	0
OG_11187							14.59	27.89	5.21	12.8	7.49	2.62	UniRef90_UPI0002F7A940_hypothetical_protein_n=2_Tax=Trichodesmium_erythraeum_RepID=UPI0002F7A940
OG_11188	0	0	0	0	0	0	0	0	0	0	0	0	UniRef90_A0A0G1EZM1_Thymidylate_kinase_n=1_Tax=Parcubacteria_bacterium_GW2011_GWB1_43_6_RepID=A0A0G1EZM1_9BACT
OG_11189							0	0	0	0	0	0
OG_1119	0.28	0.73	0	1.76	2.84	1.46	0	0	0	0	0	0	UniRef90_UPI000698FDA6_hypothetical_protein_n=2_Tax=Bacteria_RepID=UPI000698FDA6
OG_11190	0	0	0	0	0	0	0	0.44	0	0	0	0	UniRef90_K9RJ47_Uncharacterized_protein_n=1_Tax=Rivularia_sp._PCC_7116_RepID=K9RJ47_9CYAN
OG_11191	0	0	0	0	0.13	0	0	0.44	0	0	0	0	UniRef90_D3U0R7_MobA_n=8_Tax=Bacteria_RepID=D3U0R7_ECOLX
OG_11192	0	0	0	0	0	0	0	0.15	0	0	0.39	0	UniRef90_A0A0H3ZN03_Modification_methylase_Bsp6I_n=1_Tax=Vibrio_splendidus_RepID=A0A0H3ZN03_VIBSP
OG_11193							0.19	36.4	8.4	4.08	12.53	2.92	UniRef90_D7C9W2_Radical_SAM_domain-containing_protein_n=1_Tax=Streptomyces_bingchenggensis_(strain_BCW-1)_RepID=D7C9W2_STRBB
OG_11194							0	3.23	1.18	0.8	3.49	0.87	UniRef90_UPI0005D2A428_hypothetical_protein_n=1_Tax=Sorangium_cellulosum_RepID=UPI0005D2A428
OG_11195	0	0	0	0	0	0	0	0	0	0	0	0	UniRef90_B4VY66_Putative_uncharacterized_protein_n=1_Tax=Coleofasciculus_chthonoplastes_PCC_7420_RepID=B4VY66_9CYAN
OG_11196	0	0	0	0	0	0	0	0	0	0	0.26	0
OG_11197	0	0	0	0	0	0	0	0	0.5	0	0	0
OG_11198							1.94	66.05	5.38	14.07	48.32	16.77	UniRef90_K9VLR2_Uncharacterized_protein_n=3_Tax=Oscillatoriales_RepID=K9VLR2_9CYAN
OG_11199	0	0.29	0	0	0	0	0	0	0	0	0	0
OG_112	0.81	0.59	3.03	2.8	3.62	1.17	0	0	0	0	0	0	UniRef90_A1ZHI9_Twin-arginine_translocation_pathway_signal_n=1_Tax=Microscilla_marina_ATCC_23134_RepID=A1ZHI9_9BACT
OG_1120	0.43	0.44	0.67	4.8	4.65	4.67	0	0	0	0	0	0	UniRef90_A0A0D1D565_NfdA_3_protein_n=1_Tax=Jannaschia_aquimarina_RepID=A0A0D1D565_9RHOB
OG_11200							0.09	0	0	0	0	0
OG_11201	0	3.96	0.17	0.16	0	0	0.38	2.2	0	0.96	0.13	0	UniRef90_A0ZHB5_Uncharacterized_protein_n=1_Tax=Nodularia_spumigena_CCY9414_RepID=A0ZHB5_NODSP
OG_11202	0	0	0	0.08	0	0	0	0	0	0	0	0	UniRef90_UPI0006290044_cyclase_n=2_Tax=Kordia_RepID=UPI0006290044
OG_11203	0	0.29	0	0.24	1.94	0	7.49	5.14	2.18	1.44	2.07	0.44	UniRef90_A0A073CHL6_PepM_n=1_Tax=Planktothrix_agardhii_NIVA-CYA_126/8_RepID=A0A073CHL6_PLAAG
OG_11204	0	0	0	0	0	0	2.04	3.23	0.34	0.4	1.81	0.29	UniRef90_A0A073CHP2_Cytidylyltransferase_n=2_Tax=Planktothrix_agardhii_RepID=A0A073CHP2_PLAAG
OG_11205	0.05	0	0	0.16	0	0	0	0	0	0	0	0	UniRef90_A0A099Y1H0_Glycosyltransferase,_GT2_family_n=1_Tax=Polaribacter_sp._Hel1_85_RepID=A0A099Y1H0_9FLAO
OG_11206	5.88	0.29	0	0.32	0.39	0.15	0.24	3.52	3.19	1.36	1.81	1.17	UniRef90_K9W796_Mov34/MPN/PAD-1_family_protein_n=1_Tax=Crinalium_epipsammum_PCC_9333_RepID=K9W796_9CYAN
OG_11207	0.24	0	0	0	0	0	0	0	1.01	1.52	4.26	0.87	UniRef90_B7K8F8_Radical_SAM_domain_protein_n=1_Tax=Cyanothece_sp._(strain_PCC_7424)_RepID=B7K8F8_CYAP7
OG_11208							0	22.02	40.34	21.19	31.14	12.25	UniRef90_Q6E7J6_JamN_n=1_Tax=Lyngbya_majuscula_RepID=Q6E7J6_9CYAN
OG_11209							131.64	113.61	49.24	87.49	73.26	23.18	UniRef90_Q10V55_DegT/DnrJ/EryC1/StrS_aminotransferase_n=2_Tax=Trichodesmium_erythraeum_RepID=Q10V55_TRIEI
OG_1121	0.14	0.29	0.34	0.56	0.65	0.58	0	0	0	0	0	0	UniRef90_A0A098S458_Amidohydrolase_n=2_Tax=Bacteria_RepID=A0A098S458_9SPHI
OG_11210							1.9	3.96	26.39	2	5.04	0.73	UniRef90_S5AQC9_Uncharacterized_protein_n=1_Tax=Alteromonas_macleodii_str._'English_Channel_615'_RepID=S5AQC9_ALTMA
OG_11211	0.62	0.29	0.84	0	0	0	0	0.73	0.17	0.32	1.94	0.15	UniRef90_K9TST2_Capsular_polysaccharide_biosynthesis_protein_n=1_Tax=Oscillatoria_acuminata_PCC_6304_RepID=K9TST2_9CYAN
OG_11212	0.05	0	0	0.08	0	0	0.24	18.49	3.19	7.92	6.2	1.6	UniRef90_A0A058ZLV8_Sulfurtransferase_n=2_Tax=Actibacterium_atlanticum_RepID=A0A058ZLV8_9RHOB
OG_11213							0.05	25.25	9.92	0.96	3.23	0.58	UniRef90_UPI000348E370_hypothetical_protein_n=1_Tax=Prochlorothrix_hollandica_RepID=UPI000348E370
OG_11214							0	5.14	2.52	0	0.39	0	UniRef90_I4I0Y1_Uncharacterized_protein_n=1_Tax=Microcystis_aeruginosa_PCC_9809_RepID=I4I0Y1_MICAE
OG_11215							0.05	11.74	5.38	0.32	2.71	0.44	UniRef90_I4I0X9_Uncharacterized_protein_n=1_Tax=Microcystis_aeruginosa_PCC_9809_RepID=I4I0X9_MICAE
OG_11216							0.62	5.43	2.35	0.24	0.9	0.29	UniRef90_A0A0D6KHT4_ATPase,_AAA_family_n=1_Tax=Tolypothrix_sp._PCC_7601_RepID=A0A0D6KHT4_9CYAN
OG_11217							0.19	1.47	2.35	0.48	1.94	0.73	UniRef90_A3IXF9_Uncharacterized_protein_n=1_Tax=Cyanothece_sp._CCY0110_RepID=A3IXF9_9CHRO
OG_11218							0.47	0.15	1.34	0.56	1.68	0.44
OG_11219							0	0	0	0	0.13	0	UniRef90_A0A0F3GZL6_Uncharacterized_protein_n=1_Tax=Candidatus_Magnetobacterium_bavaricum_RepID=A0A0F3GZL6_9BACT
OG_1122	0.9	3.96	5.21	8.08	6.59	4.23	0	0	0	0	0	0	UniRef90_A0A098SA50_Outer_membrane_chaperone_Skp_n=2_Tax=Bacteria_RepID=A0A098SA50_9SPHI
OG_11220							0.85	0.59	1.51	0.24	0.39	0.15	UniRef90_B7JYZ4_Uncharacterized_protein_n=2_Tax=Cyanothece_RepID=B7JYZ4_CYAP8
OG_11221							0	0	0	0	0	0	UniRef90_U6GF85_Protein_kinase,_PfEST_homolog,_putative_n=1_Tax=Eimeria_acervulina_RepID=U6GF85_EIMAC
OG_11222							0.14	0.29	0.17	0.16	1.16	0.58	UniRef90_UPI00037B54A3_hypothetical_protein_n=1_Tax=Pleurocapsa_sp._PCC_7319_RepID=UPI00037B54A3
OG_11223							1.85	2.05	0.17	3.76	0.9	0	UniRef90_UPI00068E4DE8_hypothetical_protein_n=2_Tax=Verrucomicrobium_RepID=UPI00068E4DE8
OG_11224							7.11	5.87	3.03	0.4	1.81	0.15	UniRef90_UPI0006AC6B20_hypothetical_protein_n=1_Tax=unknown_RepID=UPI0006AC6B20
OG_11225							0.05	1.32	0	1.52	0.78	1.17	UniRef90_K9V9I9_Transposase_n=1_Tax=Calothrix_sp._PCC_6303_RepID=K9V9I9_9CYAN
OG_11226	0	0	0	0	0	0	6.92	11.16	6.39	13.27	25.58	8.46	UniRef90_A0A0C2LJX3_Uncharacterized_protein_n=2_Tax=Nostocales_RepID=A0A0C2LJX3_9CYAN
OG_11227							1.61	8.81	2.52	2.72	5.17	1.46	UniRef90_UPI00034A5B85_hypothetical_protein_n=1_Tax=Prochlorothrix_hollandica_RepID=UPI00034A5B85
OG_11228	0	0.15	0	0.24	0	0	0	0	0	0.4	0	0
OG_11229	0	0	0.17	0	0	0	0	0	0	0	0	0	UniRef90_A0A0C1GSR8_6,7-dimethyl-8-ribityllumazine_synthase_n=1_Tax=Ruegeria_sp._ANG-S4_RepID=A0A0C1GSR8_9RHOB
OG_1123	0.09	0.15	0.17	0.72	1.16	0.15	0	0	0	0	0	0	UniRef90_A0A098SBX0_Uncharacterized_protein_n=1_Tax=Phaeodactylibacter_xiamenensis_RepID=A0A098SBX0_9SPHI
OG_11230							0.09	0.73	1.01	1.36	1.16	0.73	UniRef90_K9UJM9_Acetyltransferase,_ribosomal_protein_N-acetylase_n=1_Tax=Chamaesiphon_minutus_PCC_6605_RepID=K9UJM9_9CHRO
OG_11231							0.19	3.23	5.88	8.32	6.07	1.46	UniRef90_K9UIM9_Methylase_involved_in_ubiquinone/menaquinone_biosynthesis_n=2_Tax=Chamaesiphon_RepID=K9UIM9_9CHRO
OG_11232	0	0	0	0	0	0	0	0	0	0	0	0	UniRef90_A4ACP6_Mg-protoporphyrin_IX_methyltransferase_n=1_Tax=Congregibacter_litoralis_KT71_RepID=A4ACP6_9GAMM
OG_11233	0	0.15	0	0	0	0	0	0	0	0	0	0	UniRef90_I0IHH6_Uncharacterized_protein_n=1_Tax=Phycisphaera_mikurensis_(strain_NBRC_102666_/_KCTC_22515_/_FYK2301M01)_RepID=I0IHH6_PHYMF
OG_11234							15.92	42.71	0.5	42.78	49.23	9.04	UniRef90_I4ID75_Uncharacterized_protein_n=1_Tax=Microcystis_sp._T1-4_RepID=I4ID75_9CHRO
OG_11235							0.38	0	0	0	0	0
OG_11236							0.05	1.32	0	1.28	1.16	0	UniRef90_UPI00063FBAAE_hypothetical_protein_n=1_Tax=Trichodesmium_erythraeum_RepID=UPI00063FBAAE
OG_11237							0	1.91	0	2.24	2.58	0.15	UniRef90_Q115Z5_Cephalosporin_hydroxylase_n=2_Tax=Trichodesmium_erythraeum_RepID=Q115Z5_TRIEI
OG_11238	0	0	0	0	0	0	0	1.03	0	1.44	1.42	1.9	UniRef90_A0A0C1FWY2_Inositol-3-phosphate_synthase_n=4_Tax=Sphingobacteriaceae_RepID=A0A0C1FWY2_9SPHI
OG_11239							5.54	134.6	181.34	87.49	60.08	23.33	UniRef90_Q10UZ2_Uncharacterized_protein_n=2_Tax=Trichodesmium_erythraeum_RepID=Q10UZ2_TRIEI
OG_1124	1.33	2.35	3.36	3.2	5.17	2.48	0	0	0	0	0	0	UniRef90_F4KX43_Electron_transfer_flavoprotein_alpha_subunit_n=1_Tax=Haliscomenobacter_hydrossis_(strain_ATCC_27775_/_DSM_1100_/_LMG_10767_/_O)_RepID=F4KX43_HALH1
OG_11240							5.21	114.2	134.96	75.33	66.54	19.1	UniRef90_Q10UZ1_Ethyl_tert-butyl_ether_degradation_EthD_n=1_Tax=Trichodesmium_erythraeum_(strain_IMS101)_RepID=Q10UZ1_TRIEI
OG_11241							0	1.32	0.17	0	0.26	0.29
OG_11242	0	0	0	0	0	0	0.05	0.29	0	0.32	0	0	UniRef90_Q116W6_Uncharacterized_protein_n=1_Tax=Trichodesmium_erythraeum_(strain_IMS101)_RepID=Q116W6_TRIEI
OG_11243							5.12	2.5	3.36	9.12	10.47	2.92	UniRef90_B4W0X4_Putative_uncharacterized_protein_n=1_Tax=Coleofasciculus_chthonoplastes_PCC_7420_RepID=B4W0X4_9CYAN
OG_11244	0	0	0	0.72	0.13	0.15	0	0	0	0	0	0	UniRef90_UPI0005701867_hypothetical_protein_n=1_Tax=Zobellia_uliginosa_RepID=UPI0005701867
OG_11245	0	0	0	0	0	0	0.05	2.79	0	3.36	0.39	0.29	UniRef90_S5J4E5_Uncharacterized_protein_n=2_Tax=Vibrio_parahaemolyticus_RepID=S5J4E5_VIBPH
OG_11246	0.09	1.47	0	0.16	1.16	0.29	0	6.46	0.17	1.68	4.39	0.73	UniRef90_E8UWY0_Uncharacterized_protein_n=1_Tax=Terriglobus_saanensis_(strain_ATCC_BAA-1853_/_DSM_23119_/_SP1PR4)_RepID=E8UWY0_TERSS
OG_11247							0	0.88	0	0.24	0.52	0.15	UniRef90_I4FGP2_Uncharacterized_protein_n=1_Tax=Microcystis_aeruginosa_PCC_9432_RepID=I4FGP2_MICAE
OG_11248							248.2	100.25	151.26	30.31	58.92	11.52	UniRef90_E0U9F9_Amidohydrolase_2_n=1_Tax=Cyanothece_sp._(strain_PCC_7822)_RepID=E0U9F9_CYAP2
OG_11249							1.14	0.15	0.67	4.72	3.23	0.58	UniRef90_Q110P2_Uncharacterized_protein_n=2_Tax=Trichodesmium_erythraeum_RepID=Q110P2_TRIEI
OG_1125	0.71	0.73	1.18	3.2	0.78	0.44	0	0	0	0	0	0	UniRef90_A0A098S2M5_Uncharacterized_protein_n=2_Tax=Bacteria_RepID=A0A098S2M5_9SPHI
OG_11250							0.66	4.84	0.17	2.08	3.1	0	UniRef90_L9XRK2_Amylopullulanase_n=1_Tax=Natronococcus_jeotgali_DSM_18795_RepID=L9XRK2_9EURY
OG_11251							0.9	0.59	1.01	0.16	0.26	0	UniRef90_UPI00030B65B9_hypothetical_protein_n=1_Tax=Calothrix_sp._PCC_7103_RepID=UPI00030B65B9
OG_11252							0.24	0.15	0	0.8	0.13	0	UniRef90_A8EUF5_DNA-binding_protein_HU_n=15_Tax=Campylobacteraceae_RepID=A8EUF5_ARCB4
OG_11253							7.77	62.38	13.11	422.8	165.26	76.1	UniRef90_Q10ZW4_Uncharacterized_protein_n=2_Tax=Trichodesmium_erythraeum_RepID=Q10ZW4_TRIEI
OG_11254							0	0	3.7	0	0	0
OG_11255							0.05	0	0	0	0	0	UniRef90_UPI00063ED724_ribonuclease_S-3_(fragment)_n=1_Tax=Trichodesmium_erythraeum_RepID=UPI00063ED724
OG_11256							0	0.15	0	0	0	0
OG_11257	0	0	0	0	0	0	0	0	0	0	0	0	UniRef90_U6GPZ0_Uncharacterized_protein_n=1_Tax=Eimeria_praecox_RepID=U6GPZ0_9EIME
OG_11258	65.71	32594.7	17647.9	5566.1	32880.2	40393.5	0	1.59	0	0.16	0.41	0.59	UniRef90_A0A0C2X9M2_Uncharacterized_protein_(Fragment)_n=1_Tax=Hebeloma_cylindrosporum_h7_RepID=A0A0C2X9M2_HEBCY
OG_11259							0.33	0.59	0.34	0.08	0.26	0	UniRef90_F4XMN0_Uncharacterized_conserved_small_protein_n=1_Tax=Moorea_producens_3L_RepID=F4XMN0_9CYAN
OG_1126	4.36	9.1	5.71	7.28	6.85	3.06	0	0	0	0	0	0	UniRef90_F4L4L1_50S_ribosomal_protein_L25_n=1_Tax=Haliscomenobacter_hydrossis_(strain_ATCC_27775_/_DSM_1100_/_LMG_10767_/_O)_RepID=F4L4L1_HALH1
OG_11260	0.09	0	0	0.08	0.26	0	0	0	0	0	0	0	UniRef90_UPI0002483B97_hypothetical_protein_n=1_Tax=Acaryochloris_sp._CCMEE_5410_RepID=UPI0002483B97
OG_11261							1.37	2.2	1.34	6.8	4.91	2.62	UniRef90_Q10WF4_Uncharacterized_protein_n=1_Tax=Trichodesmium_erythraeum_(strain_IMS101)_RepID=Q10WF4_TRIEI
OG_11262							48.38	2.94	10.92	1.04	1.81	0.58	UniRef90_A0A0C2A0N9_Fibronectin_type_III_domain_protein_n=2_Tax=Enhygromyxa_salina_RepID=A0A0C2A0N9_9DELT
OG_11263							3.93	1.61	2.52	1.2	2.07	0.73	UniRef90_A0A0F5YLI3_Uncharacterized_protein_n=1_Tax=Limnoraphis_robusta_CS-951_RepID=A0A0F5YLI3_9CYAN
OG_11264							0	0.15	0	0	0	0
OG_11265	0.52	0	0.17	0.16	0	0.15	0.05	0	0	0	0	0	UniRef90_A0A0G3EJ21_Uncharacterized_protein_n=1_Tax=Verrucomicrobia_bacterium_L21-Fru-AB_RepID=A0A0G3EJ21_9BACT
OG_11266	0	0	0	0	0	0	0	0	0	0	0	0
OG_11267							0.19	122.56	13.78	2.8	18.22	2.77
OG_11268							7.77	6.46	10.42	1.36	6.72	2.04	UniRef90_K9U371_O-methyltransferase_protein_n=1_Tax=Chroococcidiopsis_thermalis_PCC_7203_RepID=K9U371_9CYAN
OG_11269	0.05	0	0	0	0	0	0	0	0	0	0	0
OG_1127	0.33	0.88	1.18	3.04	5.04	1.75	0	0	0	0	0	0	UniRef90_A1ZEH2_Linoleoyl-CoA_desaturase_(Delta(6)-desaturase)_n=1_Tax=Microscilla_marina_ATCC_23134_RepID=A1ZEH2_9BACT
OG_11270							0	0.73	1.01	0	0	0
OG_11271	0.3	0	0	0	0	0	1.13	0	0	0	0	0
OG_11272	0	0	0	0	0	0	0	0	0	0.16	0	0.15	UniRef90_U6MZL9_Uncharacterized_protein_n=1_Tax=Eimeria_necatrix_RepID=U6MZL9_9EIME
OG_11273	0	0.29	0	0.08	0	0	0	0	0	0	0	0	UniRef90_UPI000373736E_hypothetical_protein_n=1_Tax=Balneola_vulgaris_RepID=UPI000373736E
OG_11274							1.61	0.59	2.18	0.16	0.65	0.15	UniRef90_A0YUX9_Uncharacterized_protein_n=1_Tax=Lyngbya_sp._(strain_PCC_8106)_RepID=A0YUX9_LYNSP
OG_11275	0	0	0	0.16	0	0.15	0	0	0	0	0	0	UniRef90_UPI000382C222_hypothetical_protein_n=1_Tax=Psychroflexus_tropicus_RepID=UPI000382C222
OG_11276	0	0	0	0	0	0	3.84	7.78	11.09	0.96	1.94	0.44	UniRef90_A2A004_Uncharacterized_protein_n=1_Tax=Microscilla_marina_ATCC_23134_RepID=A2A004_9BACT
OG_11277							26.58	0.88	6.55	3.92	2.07	0.73	UniRef90_A0A0C2QKB3_Uncharacterized_protein_n=1_Tax=Scytonema_tolypothrichoides_VB-61278_RepID=A0A0C2QKB3_9CYAN
OG_11278							1.04	1.47	0.53	0.16	0.65	0	UniRef90_UPI00063F6955_hypothetical_protein,_partial_n=1_Tax=Trichodesmium_erythraeum_RepID=UPI00063F6955
OG_11279							0.09	0.59	0	7.28	2.2	0.29	UniRef90_Q115Q0_Uncharacterized_protein_n=1_Tax=Trichodesmium_erythraeum_(strain_IMS101)_RepID=Q115Q0_TRIEI
OG_1128	0	15.27	0	3.12	4.65	4.96	0	0.44	0	0	0	0	UniRef90_A0A0A9VSF7_Pro-Pol_polyprotein_n=2_Tax=Lygus_hesperus_RepID=A0A0A9VSF7_LYGHE
OG_11280							0.05	4.11	0	1.2	3.36	0.29
OG_11281							0	1.03	6.55	0.24	0.78	0.15
OG_11282	0	0	0	0	0	0	0	0.29	0	0	0.13	0	UniRef90_Q116W6_Uncharacterized_protein_n=1_Tax=Trichodesmium_erythraeum_(strain_IMS101)_RepID=Q116W6_TRIEI
OG_11283	0	0	0	0	0	0	0	0	0	0	0	0
OG_11284							0.14	3.82	0.67	4.08	2.58	0.44	UniRef90_UPI0003199080_hypothetical_protein_n=1_Tax=Fischerella_muscicola_RepID=UPI0003199080
OG_11285							2.04	11.45	5.38	77.01	31.53	22.16	UniRef90_Q118N7_Uncharacterized_protein_n=1_Tax=Trichodesmium_erythraeum_(strain_IMS101)_RepID=Q118N7_TRIEI
OG_11286							0	0	0	0	0	0
OG_11287							189.26	247.33	139.83	56.3	59.18	28.14	UniRef90_Q112U0_Uncharacterized_protein_n=2_Tax=Trichodesmium_erythraeum_RepID=Q112U0_TRIEI
OG_11288							4.08	97.61	11.26	223.51	103.63	24.2	UniRef90_A0A0D6KZH1_Glycosyltransferase,_group_1_family_n=1_Tax=Tolypothrix_sp._PCC_7601_RepID=A0A0D6KZH1_9CYAN
OG_11289							5.69	0.29	4.37	1.52	1.29	0.44
OG_1129	0	0	0	1.84	3.88	1.17	0	0	0	0	0	0	UniRef90_A0A0G4B951_Uncharacterized_protein_n=3_Tax=unclassified_Parcubacteria_RepID=A0A0G4B951_9BACT
OG_11290							0	0	0	0.24	0.13	0	UniRef90_UPI00003C9FB9_hypothetical_protein_n=1_Tax=Trichodesmium_erythraeum_RepID=UPI00003C9FB9
OG_11291							2.89	2.94	3.03	2.4	1.81	0.44	UniRef90_E0UB64_Uncharacterized_protein_n=1_Tax=Cyanothece_sp._(strain_PCC_7822)_RepID=E0UB64_CYAP2
OG_11292	0	0	0	0	0.13	0.15	0	0.15	0.17	0	0.39	0
OG_11293							0	0.15	0.5	0.24	0.52	0	UniRef90_Q110X2_Extracellular_ligand-binding_receptor_n=1_Tax=Trichodesmium_erythraeum_(strain_IMS101)_RepID=Q110X2_TRIEI
OG_11294							0.14	0.29	0	0	0	0	UniRef90_F5UCQ3_Uncharacterized_protein_n=1_Tax=Microcoleus_vaginatus_FGP-2_RepID=F5UCQ3_9CYAN
OG_11295							0.85	2.94	0.67	12.08	5.94	1.6	UniRef90_UPI00063EF429_hypothetical_protein_n=2_Tax=Trichodesmium_erythraeum_RepID=UPI00063EF429
OG_11296	0	0	0	0	0	0	0	0	0	0	0	0
OG_11297							3.13	58.86	7.06	20.95	29.98	9.04	UniRef90_I4FB00_Genome_sequencing_data,_contig_C328_n=5_Tax=Microcystis_RepID=I4FB00_MICAE
OG_11298	0	0	0	0	0	0	0	0	0	0	0	0	UniRef90_UPI00063F294D_hypothetical_protein_n=1_Tax=Trichodesmium_erythraeum_RepID=UPI00063F294D
OG_11299	0.09	9.54	5.38	3.28	24.16	7.73	0	0	0	0.08	0.13	0	UniRef90_F4XZW7_Putative_uncharacterized_protein_n=1_Tax=Moorea_producens_3L_RepID=F4XZW7_9CYAN
OG_113	7.72	20.11	32.27	12.8	21.58	16.77	0	0	0	0	0	0	UniRef90_UPI00069643AC_hypothetical_protein_n=1_Tax=Aureispira_sp._CCB-QB1_RepID=UPI00069643AC
OG_1130	0.85	0.59	0.67	2.88	2.33	1.02	0	0	0	0	0	0	UniRef90_A0A098S3A8_Uncharacterized_protein_n=1_Tax=Phaeodactylibacter_xiamenensis_RepID=A0A098S3A8_9SPHI
OG_11300							0.43	0.29	0	0	0	0
OG_11301							1.42	5.43	4.54	32.23	20.41	5.83	UniRef90_Q10Y14_Uncharacterized_protein_n=1_Tax=Trichodesmium_erythraeum_(strain_IMS101)_RepID=Q10Y14_TRIEI
OG_11302							0	0	0	0	0	0
OG_11303							0.66	0.15	0.84	0.32	1.03	0.15
OG_11304							12.7	7.63	8.57	1.44	2.58	0.73	UniRef90_F4XR15_Putative_uncharacterized_protein_n=1_Tax=Moorea_producens_3L_RepID=F4XR15_9CYAN
OG_11305							3.55	1.17	3.03	0.4	1.55	0.87	UniRef90_F4XR16_Putative_uncharacterized_protein_n=1_Tax=Moorea_producens_3L_RepID=F4XR16_9CYAN
OG_11306							0	0.88	2.86	0.4	0.9	0.29	UniRef90_A0A073CBT7_Alpha-(1,3)-fucosyltransferase_10_n=3_Tax=Oscillatoriales_RepID=A0A073CBT7_PLAAG
OG_11307	0	0	0	0	0	0.15	0	0	0	0	0	0	UniRef90_E9FYT0_Putative_uncharacterized_protein_n=1_Tax=Daphnia_pulex_RepID=E9FYT0_DAPPU
OG_11308							0	0.29	0	0.4	0.26	0
OG_11309							0.14	0.73	0.5	7.12	2.33	0.73	UniRef90_Q116E4_Uncharacterized_protein_n=1_Tax=Trichodesmium_erythraeum_(strain_IMS101)_RepID=Q116E4_TRIEI
OG_1131	0	0.44	0.5	0.4	0.26	0	0	0	0	0	0	0	UniRef90_UPI0005580DE0_hypothetical_protein_n=1_Tax=Aquimarina_macrocephali_RepID=UPI0005580DE0
OG_11310							1.8	1.03	1.34	0.16	0.65	0.29
OG_11311							1656.35	60.77	14.45	51.34	58.4	8.89
OG_11312							0.9	0	0.5	0	0	0.15
OG_11313	0	1.47	0.34	0.08	0.78	0.58	0	0.44	0	0.08	0.13	0	UniRef90_Q116W5_Uncharacterized_protein_n=1_Tax=Trichodesmium_erythraeum_(strain_IMS101)_RepID=Q116W5_TRIEI
OG_11314	0	0	0	0	0	0	0	0	0	0	0	0
OG_11315	0	0	0	0	0	0	0	0	0	0	0	0
OG_11316	0	3.23	1.85	0.24	0.9	0.15	2.75	6.31	4.54	4.96	13.83	2.48	UniRef90_K9QPP8_Phage_tail_protein_n=1_Tax=Nostoc_sp._(strain_ATCC_29411_/_PCC_7524)_RepID=K9QPP8_NOSS7
OG_11317	0	0	0	0	0	0	0	0.44	0	0	0	0	UniRef90_G0NIE0_Putative_uncharacterized_protein_n=1_Tax=Caenorhabditis_brenneri_RepID=G0NIE0_CAEBE
OG_11318	0.85	0.15	0	0	0.39	0	2.7	0.59	0.5	0.08	0.26	0	UniRef90_I4I7K1_Uncharacterized_protein_n=1_Tax=Microcystis_sp._T1-4_RepID=I4I7K1_9CHRO
OG_11319							1.45	8.95	1.52	0.72	2.7	0.44
OG_1132	0.38	2.5	0.5	1.36	0.26	0.15	0	0	0	0	0	0	UniRef90_UPI000377F3AF_xylose_isomerase_n=1_Tax=Lewinella_cohaerens_RepID=UPI000377F3AF
OG_11320							2.32	13.21	6.22	2.4	8.27	2.19	UniRef90_K9PLD7_Uncharacterized_protein_n=1_Tax=Calothrix_sp._PCC_7507_RepID=K9PLD7_9CYAN
OG_11321							1	14.83	8.74	31.83	19.9	3.94	UniRef90_Q10ZJ5_Histidine_kinase_n=2_Tax=Trichodesmium_erythraeum_RepID=Q10ZJ5_TRIEI
OG_11322							0.28	0	0.17	0	0.26	0.15
OG_11323							6.07	7.49	2.69	7.92	7.36	3.06	UniRef90_Q10ZZ8_Alpha/beta_hydrolase_fold_n=3_Tax=Trichodesmium_erythraeum_RepID=Q10ZZ8_TRIEI
OG_11324	0	0	0	0	0	0	0	0	2.02	0	0	0	UniRef90_UPI0002FFF007_glycosyltransferase_n=1_Tax=Fibrella_aestuarina_RepID=UPI0002FFF007
OG_11325							3.08	6.61	19.83	135.39	70.29	20.99	UniRef90_Q119Z2_Uncharacterized_protein_n=1_Tax=Trichodesmium_erythraeum_(strain_IMS101)_RepID=Q119Z2_TRIEI
OG_11326							0	0	0	0	0	0
OG_11327							1.04	6.02	21.01	35.59	18.86	6.41	UniRef90_Q111D3_Uncharacterized_protein_n=1_Tax=Trichodesmium_erythraeum_(strain_IMS101)_RepID=Q111D3_TRIEI
OG_11328							4.04	0.88	2.15	0.3	0.99	0	UniRef90_Q10UV4_Pyruvate_dehydrogenase_E1_component_subunit_alpha_n=1_Tax=Trichodesmium_erythraeum_(strain_IMS101)_RepID=Q10UV4_TRIEI
OG_11329							6.4	3.52	2.35	1.12	1.16	0.29	UniRef90_U7QKU1_Uncharacterized_protein_n=1_Tax=Lyngbya_aestuarii_BL_J_RepID=U7QKU1_9CYAN
OG_1133	0.14	1.47	0.67	0.4	0.65	0.44	0	0	0	0	0	0	UniRef90_A0A098SBJ6_Segregation_and_condensation_protein_A_n=1_Tax=Phaeodactylibacter_xiamenensis_RepID=A0A098SBJ6_9SPHI
OG_11330							18.34	49.91	94.62	574.18	352.48	117.95	UniRef90_Q10X59_Sterol_desaturase-like_n=2_Tax=Trichodesmium_erythraeum_RepID=Q10X59_TRIEI
OG_11331							0.14	2.5	14.29	0.24	0.52	0.58	UniRef90_A0YL93_Uncharacterized_protein_n=1_Tax=Lyngbya_sp._(strain_PCC_8106)_RepID=A0YL93_LYNSP
OG_11332	0.05	0	0	0	0.13	0.15	0	0	0	0	0	0	UniRef90_B9M400_Uncharacterized_protein_n=2_Tax=Geobacter_RepID=B9M400_GEODF
OG_11333	0.05	0.29	0.5	0.16	0	0	0	0	0	0	0	0	UniRef90_UPI0004821273_hypothetical_protein_n=1_Tax=delta_proteobacterium_PSCGC_5296_RepID=UPI0004821273
OG_11334	0.05	0.15	0	0	0	0	0	0	0	0	0	0	UniRef90_Q01VV2_Anti-sigma_factor_antagonist_n=1_Tax=Solibacter_usitatus_(strain_Ellin6076)_RepID=Q01VV2_SOLUE
OG_11335							6.02	9.98	9.24	21.75	12.92	7.14	UniRef90_Q112P7_Uncharacterized_protein_n=1_Tax=Trichodesmium_erythraeum_(strain_IMS101)_RepID=Q112P7_TRIEI
OG_11336							1.66	1.03	4.87	0	0.39	0.15	UniRef90_B4VZL8_Aspartate_racemase_subfamily_n=2_Tax=Coleofasciculus_chthonoplastes_RepID=B4VZL8_9CYAN
OG_11337							3.84	8.07	4.87	8.16	4.39	1.31	UniRef90_UPI00063F6B45_hypothetical_protein_n=1_Tax=Trichodesmium_erythraeum_RepID=UPI00063F6B45
OG_11338							24.07	79.7	79.33	115.72	70.03	19.83	UniRef90_Q115N6_Uncharacterized_protein_n=2_Tax=Trichodesmium_erythraeum_RepID=Q115N6_TRIEI
OG_11339							2.99	4.99	8.07	18.39	12.79	3.79	UniRef90_Q116R0_Uncharacterized_protein_n=2_Tax=Trichodesmium_erythraeum_RepID=Q116R0_TRIEI
OG_1134	1.23	0.29	1.85	1.04	0.26	1.46	0	0	0	0	0	0	UniRef90_F4KTH7_RNA_polymerase,_sigma-24_subunit,_ECF_subfamily_n=1_Tax=Haliscomenobacter_hydrossis_(strain_ATCC_27775_/_DSM_1100_/_LMG_10767_/_O)_RepID=F4KTH7_HALH1
OG_11340							19.48	23.34	69.58	120.51	79.33	22.89	UniRef90_Q116R5_Uncharacterized_protein_n=2_Tax=Trichodesmium_erythraeum_RepID=Q116R5_TRIEI
OG_11341							9.76	40.66	61.34	103.48	56.85	19.1	UniRef90_Q116R6_Uncharacterized_protein_n=1_Tax=Trichodesmium_erythraeum_(strain_IMS101)_RepID=Q116R6_TRIEI
OG_11342							21.89	56.95	43.03	92.12	59.69	13.85	UniRef90_Q116R7_Condensin_subunit_ScpA_n=1_Tax=Trichodesmium_erythraeum_(strain_IMS101)_RepID=Q116R7_TRIEI
OG_11343	0	0	0	0	0	0	0	0	0	0	0.13	0
OG_11344	0	0	0	0	0.26	0.58	0	0	0	0	0	0
OG_11345	0	0	0	0	0.13	0	0	0	0	0	0	0.58
OG_11346	0	0	0	0	0	0	0	0	0	0	0	0.44
OG_11347							0	0	0	0	0	0
OG_11348	0	0.15	0	0	0.13	0.15	0	0	0	0	0	0.44
OG_11349	0	0	0	0	0.39	0	0	0	0	0	0	0.15
OG_1135	0.52	3.52	1.01	2.56	2.45	2.19	0	0	0	0	0	0	UniRef90_A0A0C1YEQ3_LemA_family_protein_n=3_Tax=Bacteria_RepID=A0A0C1YEQ3_9CYAN
OG_11350							4.55	6.16	5.21	3.36	2.97	0.73	UniRef90_Q114H7_Peptidase_C14,_caspase_catalytic_subunit_p20_n=1_Tax=Trichodesmium_erythraeum_(strain_IMS101)_RepID=Q114H7_TRIEI
OG_11351							69.66	2.79	10.76	186.25	122.62	37.61	UniRef90_Q110E4_Uncharacterized_protein_n=1_Tax=Trichodesmium_erythraeum_(strain_IMS101)_RepID=Q110E4_TRIEI
OG_11352	0	0	0	0	0	0	0	0	0	0	0	0	UniRef90_D3DKL6_NADH_dehydrogenase_subunit_6_n=1_Tax=Zonosagitta_nagae_RepID=D3DKL6_9BILA
OG_11353	0	0	0	0	0	0	0	0	0	0	0	0
OG_11354	0	0	0	0	0	0	0	0	0	0	0	0
OG_11355	0	0	0	0	0	0	0	0	0	0	0	0
OG_11356							4.6	17.17	64.2	38.87	27.26	6.71	UniRef90_Q112U7_Metallophosphoesterase_n=2_Tax=Trichodesmium_erythraeum_RepID=Q112U7_TRIEI
OG_11357							30.42	32.59	69.92	2.48	8.66	2.33	UniRef90_U9VIW4_Uncharacterized_protein_n=2_Tax=Leptolyngbya_RepID=U9VIW4_9CYAN
OG_11358							18.95	25.39	7.56	3.84	7.62	2.48	UniRef90_D8G1K8_DNA_polymerase_III_subunit_beta_n=1_Tax=[Oscillatoria]_sp._PCC_6506_RepID=D8G1K8_9CYAN
OG_11359							5.78	10.57	11.43	156.42	61.37	28.14	UniRef90_F4XVX5_Putative_permease_n=1_Tax=Moorea_producens_3L_RepID=F4XVX5_9CYAN
OG_1136	0.05	0	0.34	0.16	0.39	0	0	0	0	0	0	0	UniRef90_E4TLH3_Beta-lactamase_n=1_Tax=Marivirga_tractuosa_(strain_ATCC_23168_/_DSM_4126_/_NBRC_15989_/_NCIMB_1408_/_VKM_B-1430_/_H-43)_RepID=E4TLH3_MARTH
OG_11360							22.46	27.01	14.12	3.28	6.59	2.33	UniRef90_Q117S6_Uncharacterized_protein_n=1_Tax=Trichodesmium_erythraeum_(strain_IMS101)_RepID=Q117S6_TRIEI
OG_11361							0.05	0	0.34	0	0	0
OG_11362							0	0	4.37	0	0	0	UniRef90_F4Y3H2_Glucokinase,_proteobacterial_type_n=1_Tax=Moorea_producens_3L_RepID=F4Y3H2_9CYAN
OG_11363							6.78	6.75	8.24	0.8	1.55	0.29	UniRef90_A0A073CFP8_Uncharacterized_protein_n=2_Tax=Oscillatoriales_RepID=A0A073CFP8_PLAAG
OG_11364							6.49	42.86	85.38	207.92	109.96	47.24	UniRef90_Q119Y3_Putative_transcriptional_regulator_n=1_Tax=Trichodesmium_erythraeum_(strain_IMS101)_RepID=Q119Y3_TRIEI
OG_11365							0.33	0.15	39.33	0	0	0
OG_11366							4.88	3.96	7.56	0.24	1.81	0.29	UniRef90_A0YNM5_Uncharacterized_protein_n=3_Tax=Lyngbya_RepID=A0YNM5_LYNSP
OG_11367							24.4	42.13	29.08	6.08	13.83	5.83	UniRef90_A0A0C1NA75_Uncharacterized_protein_n=2_Tax=Tolypothrix_RepID=A0A0C1NA75_9CYAN
OG_11368							369.56	4.26	124.71	350.59	266.17	81.5	UniRef90_Q9KJL2_HesB_n=1_Tax=Trichodesmium_erythraeum_(strain_IMS101)_RepID=Q9KJL2_TRIEI
OG_11369	0	0	0	0	0	0.29	0	0	0	0.08	0.13	0.15
OG_1137	0.05	0	0.17	0.4	0.52	0.29	0	0	0	0	0	0	UniRef90_UPI0003A674B0_beta-xylosidase_n=1_Tax=Lewinella_cohaerens_RepID=UPI0003A674B0
OG_11370	0	0	0	0	0.13	0	0	0	0	0	0.65	0
OG_11371	0	0	0	0	0.26	0	0	0	0	0	0	0
OG_11372	0	0	0	0	0.13	0	0	0	0	0	0	0.44	UniRef90_A0A0D2QZK9_Uncharacterized_protein_n=2_Tax=Gossypium_raimondii_RepID=A0A0D2QZK9_GOSRA
OG_11373	0	0.15	0	0	0.13	0.15	0	0	0	0	0.13	0
OG_11374	0	0.15	0	0	0	0.29	0	0	0	0	0.13	0.29	UniRef90_J9KXR7_Uncharacterized_protein_n=2_Tax=Acyrthosiphon_pisum_RepID=J9KXR7_ACYPI
OG_11375							0	0	0	0	0	0
OG_11376							0	0.88	2.18	0	0.39	0
OG_11377							97.71	32.73	40.5	28.87	40.96	15.89	UniRef90_Q119J9_Glutaredoxin_n=2_Tax=Trichodesmium_erythraeum_RepID=Q119J9_TRIEI
OG_11378							9.15	5.58	8.57	10.08	8.4	2.04	UniRef90_Q10X26_Uncharacterized_protein_n=1_Tax=Trichodesmium_erythraeum_(strain_IMS101)_RepID=Q10X26_TRIEI
OG_11379							0	3.52	0.67	7.04	1.55	1.02	UniRef90_N9UXZ4_Uncharacterized_protein_n=1_Tax=Sphingopyxis_sp._MC1_RepID=N9UXZ4_9SPHN
OG_1138	0.05	0.44	0.34	0.16	0.78	0	0	0	0	0	0	0	UniRef90_UPI0005C47A39_hypothetical_protein_n=1_Tax=Flammeovirga_sp._OC4_RepID=UPI0005C47A39
OG_11380							0.05	3.96	3.03	3.52	2.58	1.02	UniRef90_Q05XB7_Diaminobutyrate--2-oxoglutarate_aminotransferase_n=2_Tax=Synechococcus_sp._RS9916_RepID=Q05XB7_9SYNE
OG_11381							4.31	1.47	6.89	1.04	1.68	1.02
OG_11382							30.75	42.27	15.63	17.43	14.21	5.39	UniRef90_Q10WE1_Uncharacterized_protein_n=1_Tax=Trichodesmium_erythraeum_(strain_IMS101)_RepID=Q10WE1_TRIEI
OG_11383							12.32	122.86	13.45	8.48	13.44	8.75	UniRef90_Q111Q2_Uncharacterized_protein_n=3_Tax=Trichodesmium_erythraeum_RepID=Q111Q2_TRIEI
OG_11384							11.7	6.31	12.44	3.44	5.56	0.73	UniRef90_A0A0J9EXX4_Uncharacterized_protein_(Fragment)_n=2_Tax=Limnoraphis_RepID=A0A0J9EXX4_9CYAN
OG_11385							0.05	0.15	0.84	1.28	0.65	0.29	UniRef90_Q10VT3_Uncharacterized_protein_n=1_Tax=Trichodesmium_erythraeum_(strain_IMS101)_RepID=Q10VT3_TRIEI
OG_11386							1.09	1.91	12.27	37.59	17.31	8.16	UniRef90_Q117N3_Uncharacterized_protein_n=2_Tax=Trichodesmium_erythraeum_RepID=Q117N3_TRIEI
OG_11387							110.45	153.39	161.85	1739.65	673.44	335.62	UniRef90_Q118N0_Uncharacterized_protein_n=1_Tax=Trichodesmium_erythraeum_(strain_IMS101)_RepID=Q118N0_TRIEI
OG_11388							0.09	0.73	6.55	2.08	1.16	0.44	UniRef90_Q112R4_Uncharacterized_protein_n=1_Tax=Trichodesmium_erythraeum_(strain_IMS101)_RepID=Q112R4_TRIEI
OG_11389	0	0.15	0	0.08	0.78	0	0	0.29	0	0.08	0.13	0.15	UniRef90_UPI0005DD3768_hypothetical_protein_n=1_Tax=Streptococcus_pneumoniae_RepID=UPI0005DD3768
OG_1139	0.05	1.32	0	0.56	0.26	0.15	0	0	0	0	0	0	UniRef90_J8VG83_Phophatidylinositol-4-phosphate_5-kinase_n=4_Tax=Fusobacterium_RepID=J8VG83_9FUSO
OG_11390	0	0	0	0	0	0	0	0	0	0	0	0	UniRef90_UPI00037883F2_hypothetical_protein_n=1_Tax=Balneola_vulgaris_RepID=UPI00037883F2
OG_11391	0	0.44	0	0	1.03	0.87	0	0.29	0	0.16	0.78	2.19
OG_11392	0	0	0	0	0.39	0.29	0	0	0	0	0.52	0.15
OG_11393							1	1.03	6.05	0.4	0.65	0.15	UniRef90_D8FUI8_Putative_uncharacterized_protein_n=1_Tax=[Oscillatoria]_sp._PCC_6506_RepID=D8FUI8_9CYAN
OG_11394							0	0	0.34	0	0	0
OG_11395							0	0	0	0	0	0
OG_11396							15.07	7.05	20.17	4.64	12.02	3.06	UniRef90_D8G7Y4_Putative_uncharacterized_protein_n=1_Tax=[Oscillatoria]_sp._PCC_6506_RepID=D8G7Y4_9CYAN
OG_11397	0	0	0	0	0	0	0	0	0	0	0	0
OG_11398	0	0	0	0	0	0	0	0	0	0	0	0
OG_11399	0	0	0	0	0.13	0.15	0	0	0.17	0	0	0
OG_114	2.42	6.46	2.52	7.36	7.88	5.98	224.32	456.65	161.01	282.53	184.77	58.61	UniRef90_A0A098S857_Dihydrolipoyllysine-residue_succinyltransferase_component_of_2-oxoglutarate_dehydrogenase_complex_n=3_Tax=Bacteria_RepID=A0A098S857_9SPHI
OG_1140	0	0	0	0.64	0.39	0	0	0	0	0	0	0	UniRef90_A0A023BVN3_Uncharacterized_protein_n=3_Tax=Aquimarina_RepID=A0A023BVN3_9FLAO
OG_11400							41.94	26.86	36.97	11.44	20.8	3.64	UniRef90_UPI00063F84E9_hypothetical_protein_n=1_Tax=Trichodesmium_erythraeum_RepID=UPI00063F84E9
OG_11401							7.11	5.58	12.44	4.32	4.91	1.31	UniRef90_Q10WP8_Uncharacterized_protein_n=1_Tax=Trichodesmium_erythraeum_(strain_IMS101)_RepID=Q10WP8_TRIEI
OG_11402							2.08	16.88	18.82	16.39	9.17	2.04	UniRef90_Q111N0_Phospholipid/glycerol_acyltransferase_n=1_Tax=Trichodesmium_erythraeum_(strain_IMS101)_RepID=Q111N0_TRIEI
OG_11403	0	0	0	0	0	0.29	0	0	0	0	0.26	0.29
OG_11404	1.47	4.4	0.17	0.16	0.13	0.44	0	0	0	0	0	0	UniRef90_D8G5B2_GDP-mannose_4,6-dehydratase_n=1_Tax=[Oscillatoria]_sp._PCC_6506_RepID=D8G5B2_9CYAN
OG_11405							0.09	1.17	0.5	0	0	0	UniRef90_A0A017T8M0_Uncharacterized_protein_n=1_Tax=Chondromyces_apiculatus_DSM_436_RepID=A0A017T8M0_9DELT
OG_11406	2.22	674.56	201.25	636.86	559.08	1477.81	0	0.91	0.17	0.24	0.91	0.49	UniRef90_A0A072TTW7_Uncharacterized_protein_n=1_Tax=Medicago_truncatula_RepID=A0A072TTW7_MEDTR
OG_11407	0	0	0	0	0	0	0.05	0	0	0	0.13	0	UniRef90_I7EKI1_Uncharacterized_protein_n=1_Tax=Phaeobacter_gallaeciensis_(strain_2.10)_RepID=I7EKI1_PHAG2
OG_11408							0	0	0	0	0	0
OG_11409							33.31	40.66	15.46	27.35	23.26	5.25	UniRef90_Q10V56_Glycosyl_transferase,_family_2_n=1_Tax=Trichodesmium_erythraeum_(strain_IMS101)_RepID=Q10V56_TRIEI
OG_1141	0.09	0	0	1.28	0.65	0.29	0	0	0	0	0	0	UniRef90_S4XU68_Uncharacterized_protein_n=1_Tax=Sorangium_cellulosum_So0157-2_RepID=S4XU68_SORCE
OG_11410	0	0	0	0	0	0	0	0	0	0	0	0
OG_11411							0.19	0	0.17	0.08	0.26	0.15	UniRef90_UPI00063EE969_hypothetical_protein_n=1_Tax=Trichodesmium_erythraeum_RepID=UPI00063EE969
OG_11412	0	0	0	0	0	0	0	0	0	0	0	0	UniRef90_A0YNR6_Putative_RTX_toxin_n=1_Tax=Lyngbya_sp._(strain_PCC_8106)_RepID=A0YNR6_LYNSP
OG_11413							0	0	0	0	0	0	UniRef90_A0A0B0QNF0_FdxN_element_excision_controlling_factor_protein_n=4_Tax=Nostocaceae_RepID=A0A0B0QNF0_APHFL
OG_11414							7.01	0.73	6.05	0.8	1.03	0.29	UniRef90_Q116T0_Uncharacterized_protein_n=1_Tax=Trichodesmium_erythraeum_(strain_IMS101)_RepID=Q116T0_TRIEI
OG_11415							1.9	1.47	3.7	0.64	2.07	0.58	UniRef90_Q10Z98_Uncharacterized_protein_n=1_Tax=Trichodesmium_erythraeum_(strain_IMS101)_RepID=Q10Z98_TRIEI
OG_11416							0	1.76	4.03	5.2	3.88	0.15	UniRef90_Q115F0_Uncharacterized_protein_n=2_Tax=Trichodesmium_erythraeum_RepID=Q115F0_TRIEI
OG_11417							6.02	1.32	3.87	0.32	1.68	0.15	UniRef90_I4FCK4_Uncharacterized_protein_n=1_Tax=Microcystis_aeruginosa_PCC_9432_RepID=I4FCK4_MICAE
OG_11418							43.83	18.05	29.92	5.76	10.47	3.94	UniRef90_UPI00034665D5_hypothetical_protein_n=1_Tax=Pleurocapsa_sp._PCC_7319_RepID=UPI00034665D5
OG_11419							7.39	5.28	8.07	1.44	3.1	0.73	UniRef90_UPI00055E112B_hypothetical_protein_n=1_Tax=Leptolyngbya_sp._JSC-1_RepID=UPI00055E112B
OG_1142	0.09	0	0	0.72	1.16	0.15	0	0	0	0	0	0	UniRef90_UPI0003B53DEC_hypothetical_protein_n=1_Tax=Leucothrix_mucor_RepID=UPI0003B53DEC
OG_11420	0	0	0	0	0	0	0	0	0	0	0	0
OG_11421							0	7.05	25.04	2.4	0.65	0.29	UniRef90_Q10ZZ4_Uncharacterized_protein_n=1_Tax=Trichodesmium_erythraeum_(strain_IMS101)_RepID=Q10ZZ4_TRIEI
OG_11422							6.54	2.35	1.85	0.72	2.45	0.44	UniRef90_UPI0005D2D6FB_hypothetical_protein_n=1_Tax=Chroococcales_cyanobacterium_CENA595_RepID=UPI0005D2D6FB
OG_11423							0.19	0.59	0.34	0.4	0.13	0	UniRef90_UPI00068574B1_transposase_n=1_Tax=Xanthomonas_sp._SHU166_RepID=UPI00068574B1
OG_11424							0.14	2.05	21.01	13.51	6.59	1.46	UniRef90_Q116C0_Uncharacterized_protein_n=2_Tax=Trichodesmium_erythraeum_RepID=Q116C0_TRIEI
OG_11425	0.05	0	0	0	0	0	0	0	0	0	0	0	UniRef90_UPI0003A44E13_phosphoribosylglycinamide_formyltransferase_n=1_Tax=Maricaulis_sp._JL2009_RepID=UPI0003A44E13
OG_11426							28.38	16.29	91.76	1.52	5.43	3.06
OG_11427	0	0	0.17	0	0	0	0	0	0	0	0	0	UniRef90_A3V4F5_Cobalt-precorrin-5B_C(1)-methyltransferase_n=2_Tax=Loktanella_vestfoldensis_RepID=A3V4F5_9RHOB
OG_11428							22.46	4.7	17.65	2.08	8.53	3.5	UniRef90_UPI00038075C0_hypothetical_protein_n=1_Tax=Spirulina_subsalsa_RepID=UPI00038075C0
OG_11429							0	0	0	0.32	0	0.15
OG_1143	0.05	0.15	0	1.04	0.9	0.44	0	0	0	0	0	0	UniRef90_UPI00037F0024_hypothetical_protein_n=1_Tax=Flexithrix_dorotheae_RepID=UPI00037F0024
OG_11430							0	0	0	0	0.39	0
OG_11431							5.39	5.87	4.71	4.64	3.75	0.44	UniRef90_Q10UU5_Protein-export_membrane_protein_SecF_n=2_Tax=Trichodesmium_erythraeum_RepID=Q10UU5_TRIEI
OG_11432							46.11	38.02	63.03	12.08	23.13	6.41	UniRef90_Q10UV1_Peptidase_M23B_n=2_Tax=Trichodesmium_erythraeum_RepID=Q10UV1_TRIEI
OG_11433							0	0	0	0	0	0
OG_11434							15.16	16.73	19.83	2.48	7.62	1.17	UniRef90_A0A0F5YLH4_Uncharacterized_protein_n=1_Tax=Limnoraphis_robusta_CS-951_RepID=A0A0F5YLH4_9CYAN
OG_11435							0	0	0	0	0	0
OG_11436	9.15	1.91	2.35	0.24	0.39	0.44	0	0	3.53	0	0	0	UniRef90_A0A0C2M8E9_Uncharacterized_protein_n=1_Tax=Scytonema_tolypothrichoides_VB-61278_RepID=A0A0C2M8E9_9CYAN
OG_11437	0	0.15	0	0	0	0	0	0	0	0	0	0	UniRef90_UPI00029A58D9_putative_endonuclease_n=1_Tax=Marinilabilia_salmonicolor_RepID=UPI00029A58D9
OG_11438							1.42	2.5	0.84	0.08	0.78	0	UniRef90_D5A5H7_Putative_uncharacterized_protein_n=1_Tax=Arthrospira_platensis_(strain_NIES-39_/_IAM_M-135)_RepID=D5A5H7_ARTPN
OG_11439	0	0	0	0	0	0	0	0	0	0	0	0	UniRef90_A4EK14_Binding-protein-dependent_transport_systems_inner_membrane_component_n=1_Tax=Roseobacter_sp._CCS2_RepID=A4EK14_9RHOB
OG_1144	0.14	0.29	0.5	0.4	0.13	0	0	0	0	0	0	0	UniRef90_A0A098S9L7_Serine_dehydratase_n=1_Tax=Phaeodactylibacter_xiamenensis_RepID=A0A098S9L7_9SPHI
OG_11440	0	0	0	0	0	0	0	0	0	0	0	0	UniRef90_UPI0005CE1B66_PREDICTED:_nuclear_speckle_splicing_regulatory_protein_1-like_n=1_Tax=Ceratosolen_solmsi_marchali_RepID=UPI0005CE1B66
OG_11441							0.05	0	1.18	0	0	0	UniRef90_B7K7K2_Uncharacterized_protein_n=1_Tax=Cyanothece_sp._(strain_PCC_7424)_RepID=B7K7K2_CYAP7
OG_11442							2.08	2.35	4.03	0.72	2.84	0.44	UniRef90_K9TNJ6_Uncharacterized_protein_n=1_Tax=Oscillatoria_acuminata_PCC_6304_RepID=K9TNJ6_9CYAN
OG_11443	0	0	0	0	0	0	0	0	0	0	0	0	UniRef90_D4ZW65_Putative_hydrolase_n=1_Tax=Arthrospira_platensis_(strain_NIES-39_/_IAM_M-135)_RepID=D4ZW65_ARTPN
OG_11444							8.1	10.42	2.69	0.96	2.45	1.75
OG_11445	0	0	0	0	1.29	0.29	0	0	0	0	1.16	1.17	UniRef90_A0A088A6G1_Uncharacterized_protein_n=7_Tax=Apoidea_RepID=A0A088A6G1_APIME
OG_11446							1.61	3.08	1.01	0.4	1.16	0	UniRef90_K9VVP9_Uncharacterized_protein_n=1_Tax=Crinalium_epipsammum_PCC_9333_RepID=K9VVP9_9CYAN
OG_11447							0	0	0	0	0	0
OG_11448	0	0	0	0	0	0	0	0	0	0	0	0
OG_11449							0	0	0	0.08	0.26	2.19
OG_1145	0.05	0	0	0.48	0.52	0.29	0	0	0	0	0	0	UniRef90_UPI00037E0C04_hypothetical_protein_n=1_Tax=Flexithrix_dorotheae_RepID=UPI00037E0C04
OG_11450							0.76	35.37	69.41	35.51	17.57	8.46	UniRef90_Q114H4_SH3,_type_3_n=2_Tax=Trichodesmium_erythraeum_RepID=Q114H4_TRIEI
OG_11451							0	0.15	0	0.32	0	0
OG_11452							0	0	0	0	0.39	0.29
OG_11453	0.05	0	0	0.16	0	0	0	0	0	0	0	0	UniRef90_A0A0C1TRC1_Uncharacterized_protein_n=2_Tax=Bacteria_RepID=A0A0C1TRC1_9CHRO
OG_11454							0	0	0	1.28	0.65	0.15	UniRef90_Q10YC4_Uncharacterized_protein_n=2_Tax=Trichodesmium_erythraeum_RepID=Q10YC4_TRIEI
OG_11455	0	0	0	0	0	0	0	0	0	0	0.13	0.15
OG_11456	0	0	0	0	0	0	0	0	0	0	0	0
OG_11457							10.8	13.5	12.44	12.8	7.11	3.06	UniRef90_Q113K7_Uncharacterized_protein_n=1_Tax=Trichodesmium_erythraeum_(strain_IMS101)_RepID=Q113K7_TRIEI
OG_11458							0	0	0	0	0	0
OG_11459							0	0	2.02	0.16	0	0	UniRef90_Q112S7_Uncharacterized_protein_n=2_Tax=Trichodesmium_erythraeum_RepID=Q112S7_TRIEI
OG_1146	0.24	0.15	0.84	0.8	1.29	0	0	0	0	0	0	0	UniRef90_UPI00035CD5F6_hypothetical_protein_n=1_Tax=Lewinella_cohaerens_RepID=UPI00035CD5F6
OG_11460							0	0	0	0	0	0
OG_11461	0	0	0	0	0	0	0	1.32	0	2.8	0	0
OG_11462							10.05	0.44	39.5	1.44	2.97	0.44	UniRef90_Q118G5_Uncharacterized_protein_n=1_Tax=Trichodesmium_erythraeum_(strain_IMS101)_RepID=Q118G5_TRIEI
OG_11463	0	0.15	0	0	1.68	2.78	0	0	0	0	0.13	2.32
OG_11464							1.56	0	0.67	0.32	0.65	0	UniRef90_Q117M9_Chromosome_segregation_ATPase-like_protein_n=1_Tax=Trichodesmium_erythraeum_(strain_IMS101)_RepID=Q117M9_TRIEI
OG_11465							0	0	0	0.08	0	0
OG_11466	0	0	0	0	0	0	0	0	0	0	0	0
OG_11467							0	0	0.34	0	0	0	UniRef90_UPI0006843173_non-ribosomal_peptide_synthetase_n=1_Tax=Fischerella_sp._PCC_9431_RepID=UPI0006843173
OG_11468	0	0	0	0	0	0	0	0	0	0	0	0
OG_11469							0	0	0	0	0	0
OG_1147	2.32	3.67	0.67	2.96	2.71	0.87	126.65	199.38	66.4	197.82	189.24	59.63	UniRef90_Q113C3_Glycosyl_transferase,_group_1_n=1_Tax=Trichodesmium_erythraeum_(strain_IMS101)_RepID=Q113C3_TRIEI
OG_11470	0	0	0	0	0	0	0	0	0	0	0	0
OG_11471							0	0	0	0	0	0
OG_11472	0	0	0	0	0	0	0	0	0	0.08	0.39	0.58
OG_11473	0	0	0	0	0	0	0	0	0	0	0.13	0.29
OG_11474							0	0.15	0	0	0.52	0.15
OG_11475							0	0	0	0	0	0
OG_11476	0	1.61	0	1.76	0	0	0	0.73	0	0.88	0	0
OG_11477							0	0	0	0	0	0
OG_11478	0	0	0	0	0	0	0	0	0	0	0	0	UniRef90_A0A0F8R236_Uncharacterized_protein_n=1_Tax=Methanosarcina_sp._1.H.A.2.2_RepID=A0A0F8R236_9EURY
OG_11479	0	0	0	0	0	0	0	0	0	0	0	0	UniRef90_A0A0G2KP90_Uncharacterized_protein_n=1_Tax=Danio_rerio_RepID=A0A0G2KP90_DANRE
OG_1148							306.3	328.8	265.21	351.78	264.62	108.91	UniRef90_Q11AC3_Uncharacterized_protein_n=2_Tax=Trichodesmium_erythraeum_RepID=Q11AC3_TRIEI
OG_11480	0	0	0	0	0	0	0	0	0	0	0	0.15
OG_11481	0	0	0	0	0.26	0.15	0	0.15	0	0	0	0
OG_11482	0	0.29	0	0	0.13	0.29	0	0.29	0	0	1.42	1.46
OG_11483	0	0	0	0	0	0	0	0	0	0	0	0
OG_11484	0	0	0	0	0.26	0.15	0	0	0	0	0.13	0.15	UniRef90_E1GRJ6_Uncharacterized_protein_(Fragment)_n=1_Tax=Loa_loa_RepID=E1GRJ6_LOALO
OG_11485							6.11	3.96	3.19	0.48	0.39	0.29
OG_11486							0	0	0	0	0	0
OG_11487	0	0	0	0	0	0	0	0	0	0	0	0
OG_11488	0	0	0	0	0	0	0	0	0	0	0	0
OG_11489	0	0	0	0	0	0	0	0	0	0	0	0	UniRef90_UPI00053F2A60_PREDICTED:_cell_division_cycle_and_apoptosis_regulator_protein_1_n=1_Tax=Vitis_vinifera_RepID=UPI00053F2A60
OG_1149	0.14	0	0.17	0.08	1.16	0	4.22	7.05	2.52	0.48	1.16	0.15	UniRef90_UPI000698808B_histidine_kinase_n=1_Tax=Phaeodactylibacter_xiamenensis_RepID=UPI000698808B
OG_11490	0	0	0	0	0.13	0	0	0	0	0	0	0	UniRef90_A0A069RAR4_Transporter,_MscS_family_n=1_Tax=[Clostridium]_litorale_DSM_5388_RepID=A0A069RAR4_CLOLI
OG_11491	0	0	0	0	0	0.15	0	0	0	0	0	0.29
OG_11492	0	0	0	0	0	0	0	0	0	0	0	0.58
OG_11493	0	0.29	0	0	0	0	0	0	0	0	0	0
OG_11494							0	0	0	0	0	0
OG_11495							0.57	0	1.01	0	0	0	UniRef90_UPI00041EA8CF_glycosyl_transferase_family_A_n=1_Tax=Planktothrix_prolifica_RepID=UPI00041EA8CF
OG_11496	0	0	0	0	0	0	0	0	0	0	0	0
OG_11497	0	4.94	0	1.4	1.45	1.36	1	1252.89	29.75	507.37	365.12	1120.52	UniRef90_K7LYH7_Uncharacterized_protein_n=2_Tax=Glycine_max_RepID=K7LYH7_SOYBN
OG_11498	0	0	0	0	0	0	0	0	0	0	0	0
OG_11499	0	0	0	0	0	0	0	0	0	0	0	0	UniRef90_G3VS34_Uncharacterized_protein_n=1_Tax=Sarcophilus_harrisii_RepID=G3VS34_SARHA
OG_115	3.22	2.2	0.34	2.32	1.55	0.73	124.58	191.7	73.45	58.78	78.04	24.78	UniRef90_Q111J6_Gamma-glutamyltransferase_2._Threonine_peptidase._MEROPS_family_T03_n=2_Tax=Trichodesmium_erythraeum_RepID=Q111J6_TRIEI
OG_1150	0.09	0.15	0	0	0	0	66.81	63.41	57.98	44.3	41.73	13.12	UniRef90_Q10Z94_Uncharacterized_protein_n=2_Tax=Trichodesmium_erythraeum_RepID=Q10Z94_TRIEI
OG_11500	0	0.15	0.67	0.16	0.52	0	0	0	0	0	0	0	UniRef90_U6JYB7_Uncharacterized_protein_n=1_Tax=Eimeria_mitis_RepID=U6JYB7_9EIME
OG_11501	0	0	0	0	0	0	0	0	0	0	0	0
OG_11502							0	0	0	0	0	0
OG_11503	0	0	0	0	0	0	0	0	0	0	0	0	UniRef90_A0A060RUI5_Calcium-dependent_protein_kinase_6_n=3_Tax=Plasmodium_(Laverania)_RepID=A0A060RUI5_PLARE
OG_11504	0	0	0	0	0	0	0	0	0	0	0	0
OG_11505	0	0	0	0	0	0	0	0.15	0	0.08	0.08	0	UniRef90_A0A0G2CAX0_Syndecan-3_(Fragment)_n=1_Tax=Scleropages_formosus_RepID=A0A0G2CAX0_9TELE
OG_11506	0	0	0	0	0	0	0	0	0	0	0	0
OG_11507	0.47	2.2	0.84	30.39	11.11	3.64	0	0	1.68	0	0	0	UniRef90_U7QE90_Uncharacterized_protein_n=2_Tax=Lyngbya_aestuarii_BL_J_RepID=U7QE90_9CYAN
OG_11508	0	0.88	0.5	0.08	1.03	0.29	0	0	0	0	0	0
OG_11509	0	0	0	0	0	0	0	0	0	0	0	0
OG_1151	0	0	0	0	0	0	9.17	2.94	2.69	1.44	1.55	0.15	UniRef90_UPI000401CD66_antirepressor_n=1_Tax=Fictibacillus_gelatini_RepID=UPI000401CD66
OG_11510	0	0	0	0	0	0	0	0	0	0	0	0
OG_11511							0	0	0	0	0	0
OG_11512	0	0	0	0	0	0	0	0	0	0	0	0
OG_11513	0	0	0	0	0	0	0	0	0	0	0	0	UniRef90_F4XY78_Putative_uncharacterized_protein_n=1_Tax=Moorea_producens_3L_RepID=F4XY78_9CYAN
OG_11514							0	0	0	0	0	0
OG_11515	0	0	0	0	0	0	0	0	0	0	0.13	0.29
OG_11516							0	0	0	0.08	0	0	UniRef90_Q114A4_Macrophage_migration_inhibitory_factor_n=2_Tax=Trichodesmium_erythraeum_RepID=Q114A4_TRIEI
OG_11517							0	0	0	0	0	0
OG_11518	0	0	0	0	0	0.15	0	0	0	0	0	0	UniRef90_A0A024WLK0_Uncharacterized_protein_n=1_Tax=Plasmodium_falciparum_MaliPS096_E11_RepID=A0A024WLK0_PLAFA
OG_11519	0	0	0	0	0.26	0.29	0	0	0	0	0	0	UniRef90_A0L4U4_SH3,_type_3_domain_protein_n=2_Tax=Magnetococcus_RepID=A0L4U4_MAGMM
OG_1152	0.62	12.77	7.9	2.88	3.75	1.02	2.27	78.68	52.77	14.39	34.5	10.5	UniRef90_Q113I2_Uncharacterized_protein_n=1_Tax=Trichodesmium_erythraeum_(strain_IMS101)_RepID=Q113I2_TRIEI
OG_11520							0	1.03	1.68	1.2	0.65	0	UniRef90_Q113C1_Uncharacterized_protein_n=1_Tax=Trichodesmium_erythraeum_(strain_IMS101)_RepID=Q113C1_TRIEI
OG_11521							0	0	0.17	0	0	0
OG_11522	0	0	0	0	0	0	0.19	0	0	0	0	0
OG_11523	0	0	0	0	0	0	0	0	0	0	0	0
OG_11524	0	0	0	0	0.13	0.15	0	0.15	0.34	0	1.42	1.17
OG_11525							0	0	0	0	0	0
OG_11526	0	0	0	0	0	0	0	0	0	0	0	0
OG_11527	0	0	0	0	0	0	0	0	0	0	0	0
OG_11528	0	0	0	0	0	0	0	0	0	0	0	0
OG_11529	0	0	0	0	0	0	0	0	0	0	0	0
OG_1153	0.05	0.15	0	0.64	3.88	1.17	695.21	936.04	522.02	912.05	629.76	219.42	UniRef90_Q111D1_Peptidyl-prolyl_cis-trans_isomerase,_cyclophilin_type_n=2_Tax=Trichodesmium_erythraeum_RepID=Q111D1_TRIEI
OG_11530	0	0	0	0	0	0	0	0	0	0	0	0	UniRef90_A0A091CXV9_Uncharacterized_protein_n=1_Tax=Fukomys_damarensis_RepID=A0A091CXV9_FUKDA
OG_11531							6.54	4.84	13.78	1.92	7.62	0.58
OG_11532							59.75	23.93	32.6	10.8	17.18	6.27	UniRef90_UPI00034665D5_hypothetical_protein_n=1_Tax=Pleurocapsa_sp._PCC_7319_RepID=UPI00034665D5
OG_11533	0	0	0	0	0	0	0	0	0	0	0	0
OG_11534	0	0	0	0	0	0	0	0	0	0	0	0
OG_11535	0	0	0	0	0.26	0	0	0	0	0	0	0
OG_11536							16.25	8.66	0.5	0.24	1.03	0
OG_11537							0	0	0	0	0	0
OG_11538	0	0	0	0	0	0	0	0	0	0	0	0
OG_11539	0	0.29	0	0.16	0	0	0	0	0	0	0	0
OG_1154	0.52	0.44	1.01	0.16	0.26	0.15	4.98	24.66	6.55	14.15	25.32	7.29	UniRef90_F6CWZ1_Adenosylmethionine--8-amino-7-oxononanoate_transaminase_n=1_Tax=Marinomonas_posidonica_(strain_CECT_7376_/_NCIMB_14433_/_IVIA-Po-181)_RepID=F6CWZ1_MARPP
OG_11540							0.76	0.44	0.84	1.92	1.16	0	UniRef90_Q113G0_Cupin_2,_conserved_barrel_n=2_Tax=Trichodesmium_erythraeum_RepID=Q113G0_TRIEI
OG_11541							23.65	48.88	21.85	67.73	44.06	17.2	UniRef90_Q10ZB5_Glyoxalase/bleomycin_resistance_protein/dioxygenase_n=2_Tax=Trichodesmium_erythraeum_RepID=Q10ZB5_TRIEI
OG_11542							3.46	6.46	2.35	5.2	6.46	1.31	UniRef90_UPI00063EED55_hypothetical_protein_n=1_Tax=Trichodesmium_erythraeum_RepID=UPI00063EED55
OG_11543							27.86	3.96	7.06	23.67	18.09	5.69	UniRef90_I4F999_Uncharacterized_protein_n=1_Tax=Microcystis_aeruginosa_PCC_9432_RepID=I4F999_MICAE
OG_11544							0	0	0.34	0	0	0	UniRef90_A0YSL7_Uncharacterized_protein_n=1_Tax=Lyngbya_sp._(strain_PCC_8106)_RepID=A0YSL7_LYNSP
OG_11545							0	1.32	1.18	0.32	0.65	0.58	UniRef90_Q115I1_Uncharacterized_protein_n=2_Tax=Trichodesmium_erythraeum_RepID=Q115I1_TRIEI
OG_11546	0	0	0	0	0	0	0	0	0	0	0	0	UniRef90_UPI000418786C_DNA_polymerase_III_subunit_delta''''_n=1_Tax=Sediminimonas_qiaohouensis_RepID=UPI000418786C
OG_11547							43.07	375.18	143.87	1542.53	924.75	286.19	UniRef90_Q116M4_Uncharacterized_protein_n=1_Tax=Trichodesmium_erythraeum_(strain_IMS101)_RepID=Q116M4_TRIEI
OG_11548							23.22	8.07	18.15	4	9.69	2.62	UniRef90_K9WL42_Putative_heme_iron_utilization_protein_n=1_Tax=Microcoleus_sp._PCC_7113_RepID=K9WL42_9CYAN
OG_11549							0.81	6.02	12.27	22.55	16.15	5.25	UniRef90_Q117W9_Uncharacterized_protein_n=3_Tax=Trichodesmium_erythraeum_RepID=Q117W9_TRIEI
OG_1155	0.28	1.61	0.67	1.28	1.16	1.31	388.04	55.48	321.17	48.3	95.23	34.55	UniRef90_K9WA61_Serine_protease_inhibitor_n=1_Tax=Microcoleus_sp._PCC_7113_RepID=K9WA61_9CYAN
OG_11550							27.34	13.21	13.11	2.72	6.07	1.17	UniRef90_UPI00003C9F11_hypothetical_protein_n=1_Tax=Trichodesmium_erythraeum_RepID=UPI00003C9F11
OG_11551							1.14	5.14	17.82	11.76	6.33	1.46	UniRef90_Q116B2_Uncharacterized_protein_n=2_Tax=Trichodesmium_erythraeum_RepID=Q116B2_TRIEI
OG_11552	6.68	1.03	3.36	1.36	2.71	0.29	0	0	0	0	0	0	UniRef90_A0A0D2WM67_Uncharacterized_protein_n=1_Tax=Skermanella_aerolata_KACC_11604_RepID=A0A0D2WM67_9PROT
OG_11553							1.14	12.18	8.57	48.3	28.81	6.71	UniRef90_Q113F3_Uncharacterized_protein_n=2_Tax=Trichodesmium_erythraeum_RepID=Q113F3_TRIEI
OG_11554							1.8	2.5	3.87	0.16	1.16	0.44	UniRef90_D8FW64_Putative_uncharacterized_protein_n=1_Tax=[Oscillatoria]_sp._PCC_6506_RepID=D8FW64_9CYAN
OG_11555	0	0	0	0	0	0	0	0	1.68	0	0	0
OG_11556							0.09	0.15	1.85	0	0.39	0
OG_11557	0	0	0	0	0	0	0	0	0	0	0	0	UniRef90_L8MXA8_Cytosine-specific_methyltransferase_n=1_Tax=Pseudanabaena_biceps_PCC_7429_RepID=L8MXA8_9CYAN
OG_11558							0.09	0.73	0.17	3.92	1.68	0.73
OG_11559	0.09	1.61	0.17	0.24	0	0.15	0	0	0	0	0	0	UniRef90_A0A0G3EA98_Biopolymer_transport_protein_ExbD_n=1_Tax=Verrucomicrobia_bacterium_L21-Fru-AB_RepID=A0A0G3EA98_9BACT
OG_1156	1.61	2.5	11.45	0.16	0.78	0.29	2.46	1.03	6.37	0	0	0.29	UniRef90_Q7NGC0_Glr3252_protein_n=1_Tax=Gloeobacter_violaceus_(strain_PCC_7421)_RepID=Q7NGC0_GLOVI
OG_11560							1.75	0.44	0.84	0.24	1.42	0.29	UniRef90_L8M7S9_Uncharacterized_protein_n=1_Tax=Xenococcus_sp._PCC_7305_RepID=L8M7S9_9CYAN
OG_11561	0	0	0.34	0	0.13	0	0	0	0	0	0	0	UniRef90_UPI00034AFCAC_group1_glycosyl_transferase_n=1_Tax=Pandoraea_sp._B-6_RepID=UPI00034AFCAC
OG_11562	0	0.29	0.67	0	0.26	0	0.19	0.29	0	0	0	0.15	UniRef90_A8UTY3_Uncharacterized_protein_n=1_Tax=Hydrogenivirga_sp._128-5-R1-1_RepID=A8UTY3_9AQUI
OG_11563							0	0	7.56	0	0	0	UniRef90_D8G3S2_Putative_uncharacterized_protein_n=1_Tax=[Oscillatoria]_sp._PCC_6506_RepID=D8G3S2_9CYAN
OG_11564	0	0	0	0	0	0	0	1.47	0.17	1.04	0.65	0.29	UniRef90_B8HT96_Glycosyl_transferase_group_1_n=1_Tax=Cyanothece_sp._(strain_PCC_7425_/_ATCC_29141)_RepID=B8HT96_CYAP4
OG_11565	0	0.15	0	0	0	0	0	0.29	0	0	0	0
OG_11566							19.43	7.93	5.38	0.8	3.23	0.44
OG_11567							0.9	0.44	0.34	0.88	0.39	0.15	UniRef90_UPI00061B1910_hypothetical_protein,_partial_n=1_Tax=Arthrospira_sp._TJSD091_RepID=UPI00061B1910
OG_11568							1.37	9.69	10.59	23.11	12.79	2.92	UniRef90_Q111H6_Uncharacterized_protein_n=2_Tax=Trichodesmium_erythraeum_RepID=Q111H6_TRIEI
OG_11569							0.05	0	1989.07	0.08	0	0
OG_1157	0.14	0.73	0.34	0.48	0.39	0.44	407.46	513.16	482.69	93.8	135.93	42.57	UniRef90_L7W2L6_Dihydroorotase_n=1_Tax=uncultured_bacterium_A1Q1_fos_97_RepID=L7W2L6_9BACT
OG_11570	0	0	0	0	0	0	0	0	0	0	0	0
OG_11571							1.99	2.35	18.66	39.9	37.86	11.66	UniRef90_Q10XM4_Uncharacterized_protein_n=1_Tax=Trichodesmium_erythraeum_(strain_IMS101)_RepID=Q10XM4_TRIEI
OG_11572							3.93	4.84	15.97	19.83	12.79	3.64	UniRef90_Q10XM5_Uncharacterized_protein_n=1_Tax=Trichodesmium_erythraeum_(strain_IMS101)_RepID=Q10XM5_TRIEI
OG_11573	0	0	2.02	0	0	0	2.7	12.92	1.85	0.32	1.03	0.44	UniRef90_F4XUJ2_Putative_uncharacterized_protein_n=1_Tax=Moorea_producens_3L_RepID=F4XUJ2_9CYAN
OG_11574	0.05	0	0	0	0	0	0.38	1.76	0.34	0.64	0.65	0.15	UniRef90_A0A011QU88_Glycosyltransferase_family_10_(Fucosyltransferase)_n=1_Tax=Candidatus_Accumulibacter_sp._BA-92_RepID=A0A011QU88_9PROT
OG_11575							0.81	0.59	1.34	0.72	0.52	0	UniRef90_U9VZ07_Glycosyl_transferase_family_2_n=1_Tax=Leptolyngbya_sp._Heron_Island_J_RepID=U9VZ07_9CYAN
OG_11576	0	0.15	0	0.32	0	0	0.09	0.44	0.17	0.4	0.13	0	UniRef90_K1WA89_Glycosyl_transferase_group_1_n=1_Tax=Arthrospira_platensis_C1_RepID=K1WA89_ARTPT
OG_11577							0	0.44	0	0.8	0	0	UniRef90_A0A0F4TEY1_Methyltransferase_type_12_n=1_Tax=Pseudomonas_fluorescens_RepID=A0A0F4TEY1_PSEFL
OG_11578							0	0	0	0.08	0	0
OG_11579							0	0	0	0	0	0.15
OG_1158							4851.29	13757	7020.31	9458.85	4549.95	1325.12	UniRef90_Q117G0_Phycobilisome_protein_n=2_Tax=Trichodesmium_erythraeum_RepID=Q117G0_TRIEI
OG_11580							1.99	0.88	1.51	0.48	0.78	0.44	UniRef90_Q10WY0_Chromosome_segregation_ATPase-like_protein_n=1_Tax=Trichodesmium_erythraeum_(strain_IMS101)_RepID=Q10WY0_TRIEI
OG_11581	0	0	0	0.08	0	0	0	0	0	0	0	0	UniRef90_A0A098S2S6_Uncharacterized_protein_n=1_Tax=Phaeodactylibacter_xiamenensis_RepID=A0A098S2S6_9SPHI
OG_11582							2.13	53.58	12.1	40.78	26.1	8.02	UniRef90_Q10Z00_Uncharacterized_protein_n=2_Tax=Trichodesmium_erythraeum_RepID=Q10Z00_TRIEI
OG_11583							6.25	3.96	4.37	2.4	2.71	0.87	UniRef90_UPI0006AA1BE7_CRISPR-associated_protein_Crm2_n=1_Tax=unknown_RepID=UPI0006AA1BE7
OG_11584							14.78	8.22	8.91	4.4	8.01	2.33	UniRef90_A0A0C2KUN7_CRISPR-associated_protein_n=1_Tax=Tolypothrix_campylonemoides_VB511288_RepID=A0A0C2KUN7_9CYAN
OG_11585							10.19	6.46	16.13	1.92	6.07	0.73	UniRef90_I4HBQ8_Cmr6_family_CRISPR-associated_RAMP_protein_n=1_Tax=Microcystis_aeruginosa_PCC_9807_RepID=I4HBQ8_MICAE
OG_11586							0.19	2.2	6.39	3.76	1.42	0.44	UniRef90_Q113I2_Uncharacterized_protein_n=1_Tax=Trichodesmium_erythraeum_(strain_IMS101)_RepID=Q113I2_TRIEI
OG_11587							0.66	0	0	0	0	0	UniRef90_UPI00063F6B54_hypothetical_protein_n=1_Tax=Trichodesmium_erythraeum_RepID=UPI00063F6B54
OG_11588	0	0	0	0	0	0	0	0	0	0	0	0	UniRef90_A0A0A0EF73_D-alanyl-D-alanine_carboxypeptidase_n=1_Tax=Pseudooceanicola_atlanticus_RepID=A0A0A0EF73_9RHOB
OG_11589							0.71	0	0	0	0	0
OG_1159	0.47	1.32	10.59	1.6	1.29	0.29	0	0.44	0	0	0	0	UniRef90_UPI00047DF086_transposase_n=1_Tax=Polaribacter_sp._Hel_I_88_RepID=UPI00047DF086
OG_11590							0.19	1.32	6.72	0.32	2.07	0	UniRef90_B4VKI0_Putative_uncharacterized_protein_n=1_Tax=Coleofasciculus_chthonoplastes_PCC_7420_RepID=B4VKI0_9CYAN
OG_11591	0.19	0.15	0	0	0	0	0	0	0	0	0	0	UniRef90_U5QC92_Acetyltransferase_n=2_Tax=Gloeobacter_RepID=U5QC92_9CYAN
OG_11592							0.52	0	0.5	0	0	0.15	UniRef90_Q10W32_Uncharacterized_protein_n=2_Tax=Trichodesmium_erythraeum_RepID=Q10W32_TRIEI
OG_11593	0	0	0	0	0	0	0	0	0	0	0	0	UniRef90_A0Z8E1_ATPase_n=1_Tax=marine_gamma_proteobacterium_HTCC2080_RepID=A0Z8E1_9GAMM
OG_11594	0	0	0.17	0	0	0	0	0	0	0	0	0
OG_11595							81.5	20.84	73.11	28.95	59.95	19.68	UniRef90_D8G8N4_Putative_uncharacterized_protein_n=1_Tax=[Oscillatoria]_sp._PCC_6506_RepID=D8G8N4_9CYAN
OG_11596	0	0	0	0	0	0	0.85	0	0	0.16	0.52	0
OG_11597	0	0	0	0	0	0	0	0	0	0	0	0
OG_11598	0	0	0	0	0	0	0	0	0	0	0	0
OG_11599	0	0	0	0	0	0	0	0	0	0	0	0	UniRef90_I4G8Z9_Modification_methylase_EcoRI_n=8_Tax=Microcystis_RepID=I4G8Z9_MICAE
OG_116	1.47	21.87	3.19	9.84	8.4	4.67	200.77	58.42	124.37	191.29	134.63	53.65	UniRef90_Q119G2_Peptide_methionine_sulfoxide_reductase_MsrA_n=2_Tax=Trichodesmium_erythraeum_RepID=MSRA_TRIEI
OG_1160	0.05	0	0.34	0.72	0.39	0.29	0	0	0	0	0	0	UniRef90_F4L7E5_Isopenicillin-N_epimerase_n=1_Tax=Haliscomenobacter_hydrossis_(strain_ATCC_27775_/_DSM_1100_/_LMG_10767_/_O)_RepID=F4L7E5_HALH1
OG_11600							0.43	3.52	0.67	6.88	4.13	1.31	UniRef90_G0IXG5_Uncharacterized_protein_n=3_Tax=Bacteria_RepID=G0IXG5_CYCMS
OG_11601							0.47	14.53	1.01	9.6	8.79	2.92	UniRef90_UPI00003C9DED_hypothetical_protein_n=2_Tax=Trichodesmium_erythraeum_RepID=UPI00003C9DED
OG_11602							11.37	10.27	23.7	6.4	8.92	3.21	UniRef90_A0YLG7_Uncharacterized_protein_n=1_Tax=Lyngbya_sp._(strain_PCC_8106)_RepID=A0YLG7_LYNSP
OG_11603							2.8	3.96	1.85	4	1.29	0.73	UniRef90_Q113H7_Glycosyltransferase,_MGT_family_n=2_Tax=Trichodesmium_erythraeum_RepID=Q113H7_TRIEI
OG_11604							0	0	0	0	0	0	UniRef90_T2JXV3_DNA_topoisomerase_I_n=7_Tax=Chroococcales_RepID=T2JXV3_CROWT
OG_11605	0	0	0	0	0	0	0	0	0	0	0	0	UniRef90_UPI0002E77B3D_hypothetical_protein_n=2_Tax=Verrucomicrobia_bacterium_SCGC_AAA168-F10_RepID=UPI0002E77B3D
OG_11606							0	0	0	0	0	0
OG_11607							49.99	66.05	62.35	13.43	50.26	16.18	UniRef90_B4VW12_Putative_uncharacterized_protein_n=1_Tax=Coleofasciculus_chthonoplastes_PCC_7420_RepID=B4VW12_9CYAN
OG_11608							2.08	0.59	1.85	6.48	3.62	1.02	UniRef90_UPI00003C9B34_hypothetical_protein_n=2_Tax=Trichodesmium_erythraeum_RepID=UPI00003C9B34
OG_11609							1.37	1.17	0.67	0.64	1.03	0.29
OG_1161	0.05	0.73	0.67	0.48	0.78	0.58	0	0	0	0	0	0	UniRef90_UPI00036DF0A6_hypothetical_protein_n=1_Tax=Lewinella_cohaerens_RepID=UPI00036DF0A6
OG_11610							0	0.15	0	0.24	0	0
OG_11611							0	1.03	0	0.8	0.26	0	UniRef90_Q10X53_3',5'-cyclic-nucleotide_phosphodiesterase_n=1_Tax=Trichodesmium_erythraeum_(strain_IMS101)_RepID=Q10X53_TRIEI
OG_11612							2.89	1.76	2.86	2.56	3.23	1.9
OG_11613							25.59	7.05	43.7	19.99	14.99	6.85
OG_11614							0	0	0	0.08	0	0	UniRef90_A8YHM7_InsB_protein_n=1_Tax=Microcystis_aeruginosa_PCC_7806_RepID=A8YHM7_MICAE
OG_11615							0.09	1.17	0.34	2	1.55	0
OG_11616							0.14	4.4	0.17	2.8	1.94	0.29	UniRef90_Q10YW2_Recombinase_n=1_Tax=Trichodesmium_erythraeum_(strain_IMS101)_RepID=Q10YW2_TRIEI
OG_11617							0	0	0	0	0	0	UniRef90_F4XY78_Putative_uncharacterized_protein_n=1_Tax=Moorea_producens_3L_RepID=F4XY78_9CYAN
OG_11618	0	0	0	0	0	0	0	0	0	0	0	0
OG_11619							0	0	0	0	0	0
OG_1162	0.14	0	0.34	0.32	0.13	0	0	0	0	0	0	0	UniRef90_A0A0C1JD85_Haloalkane_dehalogenase_n=1_Tax=Ruegeria_sp._ANG-S4_RepID=A0A0C1JD85_9RHOB
OG_11620	0	0	0	0.4	0	0	0	0	0	0	0	0	UniRef90_U3AUM2_Uncharacterized_protein_n=1_Tax=Pseudomonas_alcaligenes_NBRC_14159_RepID=U3AUM2_PSEAC
OG_11621	0	0	0	0	0	0	0	0	0	0	0	0	UniRef90_H1WC98_Putative_Acetyltransferase,_LpxA-like_n=2_Tax=Oscillatoriales_RepID=H1WC98_9CYAN
OG_11622	0.9	0.44	1.01	0.24	0.13	0.15	2.18	0.15	0.17	0.08	0.39	0.15	UniRef90_UPI0004A760FF_hypothetical_protein_n=1_Tax=Desulfovibrio_sp._L21-Syr-AB_RepID=UPI0004A760FF
OG_11623							0	0	0	0	0.13	0	UniRef90_B1WTY2_Putative_N-6_DNA_methylase_n=1_Tax=Cyanothece_sp._(strain_ATCC_51142)_RepID=B1WTY2_CYAA5
OG_11624							0.05	0	0	0.08	0.13	0	UniRef90_UPI00069AC90F_hypothetical_protein_n=1_Tax=Trichodesmium_erythraeum_RepID=UPI00069AC90F
OG_11625							49.33	3.23	22.52	4.32	12.4	4.23	UniRef90_K9ZQJ7_Uncharacterized_protein_n=1_Tax=Anabaena_cylindrica_(strain_ATCC_27899_/_PCC_7122)_RepID=K9ZQJ7_ANACC
OG_11626							112.82	3.38	58.49	12.8	33.08	9.91
OG_11627	0	0	0	0	0	0	8.15	0	0	0	0	0	UniRef90_D4H805_YD_repeat_protein_n=1_Tax=Denitrovibrio_acetiphilus_(strain_DSM_12809_/_N2460)_RepID=D4H805_DENA2
OG_11628							0.19	0	0.5	0.64	0.52	0.15	UniRef90_Q114A1_GUN4-like_n=1_Tax=Trichodesmium_erythraeum_(strain_IMS101)_RepID=Q114A1_TRIEI
OG_11629							0	0.15	2.69	1.2	1.68	0.29	UniRef90_K1W936_Uncharacterized_protein_n=1_Tax=Arthrospira_platensis_C1_RepID=K1W936_ARTPT
OG_1163	0.14	0.59	0.17	0.88	0.52	0.44	0	0	0	0	0	0	UniRef90_F4KZQ5_ROK_family_protein_n=1_Tax=Haliscomenobacter_hydrossis_(strain_ATCC_27775_/_DSM_1100_/_LMG_10767_/_O)_RepID=F4KZQ5_HALH1
OG_11630							0.66	11.74	9.75	33.03	18.35	3.06	UniRef90_Q112S0_Methyltransferase_type_11_n=2_Tax=Trichodesmium_erythraeum_RepID=Q112S0_TRIEI
OG_11631	0	0	0	0	0	0	0	0	0	0	0	0
OG_11632							0	1.47	3.87	2.4	1.29	0.87	UniRef90_UPI00063F9C5D_hypothetical_protein_n=1_Tax=Trichodesmium_erythraeum_RepID=UPI00063F9C5D
OG_11633	0	0	0	0	0	0	0	0	0.5	0	0	0	UniRef90_F5YHK7_Uncharacterized_protein_n=2_Tax=Treponema_primitia_RepID=F5YHK7_TREPZ
OG_11634							16.73	18.35	7.23	8.72	29.72	8.46	UniRef90_A0A0F7E5A0_N-acetylmuramoyl-L-alanine_amidase_n=1_Tax=Myxococcus_fulvus_124B02_RepID=A0A0F7E5A0_MYXFU
OG_11635							9.33	13.06	5.21	17.27	13.7	4.37	UniRef90_Q10UU9_Uncharacterized_protein_n=1_Tax=Trichodesmium_erythraeum_(strain_IMS101)_RepID=Q10UU9_TRIEI
OG_11636							0.05	0.15	0.34	1.52	2.07	0.29
OG_11637	0	0	0	0.08	0	0	0.19	12.33	0	0.8	0.78	0	UniRef90_A0A098TKI3_Uncharacterized_protein_n=2_Tax=Neosynechococcus_RepID=A0A098TKI3_9CHRO
OG_11638	0	0	0	0	0	0	0	0	0	0	0	0
OG_11639	0	0.15	0	0.16	0	0	0.47	0.59	8.74	0.72	0.13	0.29	UniRef90_A0A0A3J4J1_Uncharacterized_protein_n=1_Tax=Lysinibacillus_massiliensis_4400831_=_CIP_108448_=_CCUG_49529_RepID=A0A0A3J4J1_9BACI
OG_1164	0.14	0.73	0.17	0.16	0.13	0.15	37.01	76.03	39.83	63.42	56.08	18.08	UniRef90_Q114A6_Glutamate_5-kinase_n=2_Tax=Trichodesmium_erythraeum_RepID=Q114A6_TRIEI
OG_11640	0.05	2.05	0	2.16	0.39	0.29	0	0	0	0	0	0
OG_11641							0	0.15	1.68	0.08	0	0	UniRef90_B7KJ07_Uncharacterized_protein_n=1_Tax=Cyanothece_sp._(strain_PCC_7424)_RepID=B7KJ07_CYAP7
OG_11642							0	0	0	0.08	0	0
OG_11643							0.09	1.61	0.34	19.91	5.43	2.62
OG_11644							0.66	0.15	0.5	0.24	0.13	0.29	UniRef90_Q111F5_UvrABC_system_protein_B_n=3_Tax=Trichodesmium_erythraeum_RepID=Q111F5_TRIEI
OG_11645							0.09	0.15	0	0.08	0	0	UniRef90_A0A0D6AP43_Mobile_element_protein_n=1_Tax=Geminocystis_sp._NIES-3709_RepID=A0A0D6AP43_9CHRO
OG_11646							0	1.03	0.17	2.72	1.68	0.29	UniRef90_UPI0000392428_hypothetical_protein_n=1_Tax=Trichodesmium_erythraeum_RepID=UPI0000392428
OG_11647							0	0	0	0	0	0
OG_11648							0.09	0.15	13.95	0.16	0.39	0	UniRef90_K9QUL6_Putative_acetyltransferase_n=1_Tax=Nostoc_sp._(strain_ATCC_29411_/_PCC_7524)_RepID=K9QUL6_NOSS7
OG_11649							0.62	5.72	1.18	33.75	19.64	7.73	UniRef90_Q111L3_Uncharacterized_protein_n=2_Tax=Trichodesmium_erythraeum_RepID=Q111L3_TRIEI
OG_1165	0.19	0.59	0.84	0.96	1.16	0.58	0	0	0	0	0	0	UniRef90_A1ZH28_Glycerol-3-phosphate_dehydrogenase_n=1_Tax=Microscilla_marina_ATCC_23134_RepID=A1ZH28_9BACT
OG_11650							0	0	0	0	0	0
OG_11651	0	0	0	0	0	0	0	0	0	0	0	0	UniRef90_UPI0004F90EA2_restriction_endonuclease_n=1_Tax=Flavobacterium_psychrophilum_RepID=UPI0004F90EA2
OG_11652							0	0	0	0	0	0
OG_11653							0.05	0.15	0	0.56	0.13	0.15
OG_11654	0	0	0	0	0	0	0	0	0	0	0	0	UniRef90_A0A0F9F1M3_Uncharacterized_protein_n=1_Tax=marine_sediment_metagenome_RepID=A0A0F9F1M3_9ZZZZ
OG_11655							0	0	0	0	0	0
OG_11656							1.85	43.15	7.39	59.1	31.01	8.46	UniRef90_Q10XU5_Uncharacterized_protein_n=1_Tax=Trichodesmium_erythraeum_(strain_IMS101)_RepID=Q10XU5_TRIEI
OG_11657	0	0	0	0	0	0	0	0	0	0	0	0	UniRef90_A5L1F7_Uncharacterized_protein_n=1_Tax=Vibrionales_bacterium_(strain_SWAT-3)_RepID=A5L1F7_VIBBS
OG_11658	0	0	0	0	0	0	0	0	0	0	0	0
OG_11659	0	0	0	0	0	0	0	0	0	0	0	0
OG_1166	48.33	26.27	52.94	103.96	137.48	62.25	32072.1	11538.9	17242.3	13299.5	18816	4669.62	UniRef90_Q111Y3_Photosystem_antenna_protein-like_n=2_Tax=Trichodesmium_erythraeum_RepID=Q111Y3_TRIEI
OG_11660	0	0	0	0	0	0	0	0	0	0	0	0
OG_11661	0	0	0	0	0	0	7.39	393.82	290.25	401.13	495.52	708.7	UniRef90_UPI0005563D48_hypothetical_protein_n=2_Tax=Bacilli_RepID=UPI0005563D48
OG_11662							4.98	123.01	16.3	114.6	63.7	28.72	UniRef90_Q111S1_Uncharacterized_protein_n=1_Tax=Trichodesmium_erythraeum_(strain_IMS101)_RepID=Q111S1_TRIEI
OG_11663	0	0	0	0	0	0	0	0	0	0	0	0
OG_11664							0.09	0.15	0	0.24	0.26	0.15	UniRef90_I7BI80_3-oxoacyl-[acyl-carrier-protein]_reductase_n=4_Tax=Pseudomonas_putida_RepID=I7BI80_PSEPT
OG_11665	0	0	0.34	0	0.13	0	0	0	0	0	0	0
OG_11666							21.8	1.76	1.34	0.48	1.03	0.15
OG_11667	0	0	308.07	0	0	0	0	0	0	0.4	0.13	0
OG_11668							0	0	0	0	0	0	UniRef90_UPI00063F4F83_hypothetical_protein_n=1_Tax=Trichodesmium_erythraeum_RepID=UPI00063F4F83
OG_11669							0.24	4.55	8.57	8.72	4.78	2.04	UniRef90_Q115K7_Uncharacterized_protein_n=2_Tax=Trichodesmium_erythraeum_RepID=Q115K7_TRIEI
OG_1167	0	0.15	0	0.72	0	0.15	0	0.15	0	0	1.29	3.79	UniRef90_W4XX77_Uncharacterized_protein_n=1_Tax=Strongylocentrotus_purpuratus_RepID=W4XX77_STRPU
OG_11670	0	0.29	0	0	0.39	0	0.38	0.15	0	0	0	0	UniRef90_I5B594_Endonuclease_IV_n=1_Tax=Desulfobacter_postgatei_2ac9_RepID=I5B594_9DELT
OG_11671							4.08	0.59	0.67	0	0.26	0	UniRef90_A0A091A9U1_Glycosyl_transferase_2_family_protein_n=1_Tax=Aeromonas_salmonicida_RepID=A0A091A9U1_AERSA
OG_11672	0	0	0	0	0	0	28.76	8.95	9.24	6.4	4.39	2.48	UniRef90_M2ZAW8_Radical_SAM_domain-containing_protein_n=2_Tax=Magnetospirillum_RepID=M2ZAW8_9PROT
OG_11673							0	1.17	0	0.72	0.78	0.15	UniRef90_Q10VG9_Uncharacterized_protein_n=2_Tax=Trichodesmium_erythraeum_RepID=Q10VG9_TRIEI
OG_11674	1.33	0.15	0	0.32	0.26	0	2.89	0.44	0.67	0	0.52	0.15	UniRef90_U6MPY8_Translational_activator,_putative_n=1_Tax=Eimeria_necatrix_RepID=U6MPY8_9EIME
OG_11675							0.43	0	0.67	0.16	0.26	0	UniRef90_B4VYU0_Asparagine_synthase_family_n=1_Tax=Coleofasciculus_chthonoplastes_PCC_7420_RepID=B4VYU0_9CYAN
OG_11676	0	0.15	0	0	0	0.15	4.88	3.82	1.51	0.8	1.03	0.58	UniRef90_D5WG31_Glycosyl_transferase_group_1_n=1_Tax=Burkholderia_sp._(strain_CCGE1002)_RepID=D5WG31_BURSC
OG_11677	0	1.03	0.17	0.08	0.26	0	0	0.15	0	0	0	0	UniRef90_UPI000409A276_hypothetical_protein_n=1_Tax=Caulobacter_sp._URHA0033_RepID=UPI000409A276
OG_11678							23.79	2.5	1.85	3.28	3.62	1.6	UniRef90_A0A0F7BMG0_MFS_transporter_n=1_Tax=Myxococcus_fulvus_124B02_RepID=A0A0F7BMG0_MYXFU
OG_11679							150.35	155	85.04	13.83	50.91	10.64	UniRef90_W4MCN0_Uncharacterized_protein_n=1_Tax=Candidatus_Entotheonella_sp._TSY2_RepID=W4MCN0_9DELT
OG_1168	0.28	1.17	0.17	0.48	0.52	0.29	67.48	150.89	82.69	70.13	75.2	21.87	UniRef90_A0A098S3F5_Uncharacterized_protein_n=1_Tax=Phaeodactylibacter_xiamenensis_RepID=A0A098S3F5_9SPHI
OG_11680							26.25	24.81	11.93	4.88	15.38	3.94	UniRef90_W6M8N1_ATPase_associated_with_various_cellular_activities_n=1_Tax=Candidatus_Contendobacter_odensis_Run_B_J11_RepID=W6M8N1_9GAMM
OG_11681	1.14	0.44	1.18	0.4	0.39	0.15	0.28	1.03	0	0.64	0.52	0.29
OG_11682	0	0	0	0	0	0	0	0	0	0	0	0	UniRef90_F4XP82_Glycosyltransferase_involved_in_cell_wall_biogenesis_n=1_Tax=Moorea_producens_3L_RepID=F4XP82_9CYAN
OG_11683							10.09	0.73	2.35	0	0	0
OG_11684							17.11	11.3	10.76	2	5.43	1.46	UniRef90_A0A0F6U402_Uncharacterized_protein_n=4_Tax=Microcystis_aeruginosa_RepID=A0A0F6U402_MICAE
OG_11685							152.39	156.18	90.08	15.19	30.36	10.35	UniRef90_F4Y0P7_CVNH_domain_protein_n=1_Tax=Moorea_producens_3L_RepID=F4Y0P7_9CYAN
OG_11686							0.09	0.15	0	0.48	0.26	0	UniRef90_Q10WV3_Uncharacterized_protein_n=1_Tax=Trichodesmium_erythraeum_(strain_IMS101)_RepID=Q10WV3_TRIEI
OG_11687	0	0	0	0	0	0	0.19	0	0	0	0	0
OG_11688							0.85	0.29	0	0.4	0.13	0	UniRef90_UPI000420D0A7_hypothetical_protein_n=1_Tax=Dolichospermum_circinale_RepID=UPI000420D0A7
OG_11689							0.38	0	0	0	0.52	0	UniRef90_X0U9V0_Marine_sediment_metagenome_DNA,_contig:_S01H1_S06578_n=1_Tax=marine_sediment_metagenome_RepID=X0U9V0_9ZZZZ
OG_1169	0.24	1.32	0.17	3.68	2.97	1.02	141.02	184.36	114.62	91.48	108.92	23.91	UniRef90_A0A098S1E9_Endonuclease_MutS2_n=1_Tax=Phaeodactylibacter_xiamenensis_RepID=A0A098S1E9_9SPHI
OG_11690	0.62	0	0	0	0	0	0	0	0	0.08	0	0	UniRef90_I4APG6_Methyltransferase_family_protein_n=2_Tax=Flexibacter_litoralis_RepID=I4APG6_FLELS
OG_11691	1.71	0.59	0.5	0	0	0	0	0.15	0	0	0	0	UniRef90_I4APG7_Methylase_involved_in_ubiquinone/menaquinone_biosynthesis_n=1_Tax=Flexibacter_litoralis_(strain_ATCC_23117_/_DSM_6794_/_NBRC_15988_/_NCIMB_1366_/_Sio-4)_RepID=I4APG7_FLELS
OG_11692	0	0	0	0.16	0	0	0	0	2.18	0	0	0
OG_11693	0	0	0	0.08	0	0	0	0	2.02	0	0	0
OG_11694							5.02	5.87	2.86	2.64	3.88	1.46	UniRef90_F4XVM2_Putative_uncharacterized_protein_n=1_Tax=Moorea_producens_3L_RepID=F4XVM2_9CYAN
OG_11695	0	0	0	0.08	0	0	0.85	15.85	6.05	2.56	0.26	0.44	UniRef90_D0LWS7_Radical_SAM_domain_protein_n=2_Tax=Haliangium_ochraceum_RepID=D0LWS7_HALO1
OG_11696							1.18	0.29	3.03	0	0.52	0.29	UniRef90_H8GG45_Uncharacterized_protein_n=1_Tax=Methylomicrobium_album_BG8_RepID=H8GG45_METAL
OG_11697							15.68	11.3	61.18	0.96	3.88	1.75	UniRef90_A0YXY7_Uncharacterized_protein_n=2_Tax=Lyngbya_RepID=A0YXY7_LYNSP
OG_11698							0	8.66	1.01	1.2	4.39	2.77	UniRef90_UPI00036A95D6_hypothetical_protein_n=1_Tax=Oscillatoria_sp._PCC_10802_RepID=UPI00036A95D6
OG_11699							0.05	92.18	15.8	27.59	101.56	67.94	UniRef90_I4GT66_Putative_Choline-sulfatase_n=1_Tax=Microcystis_aeruginosa_PCC_9806_RepID=I4GT66_MICAE
OG_117	0.33	2.05	1.01	1.92	2.07	1.31	0	0	0	0	0	0	UniRef90_UPI0006979075_hypothetical_protein_n=1_Tax=Aureispira_sp._CCB-QB1_RepID=UPI0006979075
OG_1170	0.81	3.67	1.85	2.56	3.23	2.04	126.04	152.36	88.91	212.56	93.29	42.86	UniRef90_Q110D2_50S_ribosomal_protein_L17_n=1_Tax=Trichodesmium_erythraeum_(strain_IMS101)_RepID=RL17_TRIEI
OG_11700							62.12	220.03	43.53	94.2	63.7	19.24	UniRef90_Q111E8_Cytochrome_c-550-like_protein_n=1_Tax=Trichodesmium_erythraeum_(strain_IMS101)_RepID=PSBV2_TRIEI
OG_11701							0	0	0	0.08	0	0
OG_11702							1.9	0.44	0.84	0.64	0.39	0.73	UniRef90_K7W5B3_Uncharacterized_protein_n=1_Tax=Anabaena_sp._90_RepID=K7W5B3_9NOST
OG_11703	0	0	0	0	0	0	0	0	0	0	0	0
OG_11704							0	628.26	18.32	27.72	346.6	73.19	UniRef90_V3Z090_Uncharacterized_protein_(Fragment)_n=1_Tax=Lottia_gigantea_RepID=V3Z090_LOTGI
OG_11705							0	0	0	0	0	0	UniRef90_G6D2K4_Uncharacterized_protein_n=1_Tax=Danaus_plexippus_RepID=G6D2K4_DANPL
OG_11706							0	0.15	0	0	0	0	UniRef90_A0A0K0FMW3_Uncharacterized_protein_n=1_Tax=Strongyloides_venezuelensis_RepID=A0A0K0FMW3_9BILA
OG_11707	0	0	0	0	0	0	0	1.17	0	0.64	1.29	0.29	UniRef90_B8KX74_Uncharacterized_protein_n=1_Tax=Luminiphilus_syltensis_NOR5-1B_RepID=B8KX74_9GAMM
OG_11708							33.55	20.55	39.5	14.07	22.22	6.71	UniRef90_A0A0C2Q288_CRISPR-associated_protein,_Crm2_family_n=1_Tax=Tolypothrix_campylonemoides_VB511288_RepID=A0A0C2Q288_9CYAN
OG_11709							0	0	0	0	0	0	UniRef90_Q10Z84_Serine/threonine_protein_kinase_with_TPR_repeats_n=2_Tax=Trichodesmium_erythraeum_RepID=Q10Z84_TRIEI
OG_1171	0	0.15	0	0.08	0.13	0	0	0.15	0.17	0	0	0	UniRef90_UPI000697B517_PREDICTED:_RNA-directed_DNA_polymerase_from_mobile_element_jockey-like_n=1_Tax=Lingula_unguis_RepID=UPI000697B517
OG_11710							1.37	1.47	2.18	0.96	1.42	0.29
OG_11711							3.17	3.23	3.7	1.04	2.84	0.73	UniRef90_UPI0002EED666_radical_SAM_protein_n=1_Tax=Clostridium_tunisiense_RepID=UPI0002EED666
OG_11712							0.85	0.88	2.02	1.12	1.81	0.29
OG_11713							0.14	0.44	0	0	0	0	UniRef90_UPI0003B4F72B_hypothetical_protein_n=1_Tax=Desulfospira_joergensenii_RepID=UPI0003B4F72B
OG_11714							0.14	0	0	0	0.13	0
OG_11715	0.33	0.61	0.84	1.28	0.39	0.32	0.85	3.94	1.68	4.32	3.88	0.99	UniRef90_I4HEQ0_Similar_to_tr|A0L100|A0L100_SHESA_Cell_divisionFtsK/SpoIIIE_n=2_Tax=Microcystis_aeruginosa_RepID=I4HEQ0_MICAE
OG_11716							0	0	0	0	0.13	0
OG_11717	0	0	0	0	0	0	0	0	0	0	0	0	UniRef90_E3MEP0_Putative_uncharacterized_protein_n=1_Tax=Caenorhabditis_remanei_RepID=E3MEP0_CAERE
OG_11718							0.85	2.94	2.52	8.72	6.33	3.35	UniRef90_Q119J7_Uncharacterized_protein_n=1_Tax=Trichodesmium_erythraeum_(strain_IMS101)_RepID=Q119J7_TRIEI
OG_11719	0	0	0.17	0	0	0	0	0	0	0	0	0	UniRef90_A1ZZ51_Uncharacterized_protein_n=2_Tax=Microscilla_marina_RepID=A1ZZ51_9BACT
OG_1172	0	0	0	0	0	0	0	0	0	0	0	0	UniRef90_UPI000395AB14_PREDICTED:_elastin-like_n=1_Tax=Pseudopodoces_humilis_RepID=UPI000395AB14
OG_11720							1.52	3.08	0.67	0.88	2.71	0.73	UniRef90_Q4C7P8_TPR_repeat_n=6_Tax=Crocosphaera_watsonii_RepID=Q4C7P8_CROWT
OG_11721							0	0	0	0	0	0
OG_11722							2.13	0.44	0	0.08	0.9	0.58
OG_11723	0	0	0	0.08	0.39	0	0	1.17	0.17	0.08	0	0
OG_11724	0	0.44	0.17	0.88	2.58	0.58	0.14	0	0	0	0	0	UniRef90_UPI0004116351_hypothetical_protein_n=1_Tax=Bacillus_thuringiensis_RepID=UPI0004116351
OG_11725							0.05	0	0	0	0	0
OG_11726							0	0	0	0	0	0
OG_11727	0	0	0	0	0	0	10.09	0.59	0.34	0.24	0.52	0	UniRef90_A2SDE0_Methylase_involved_in_ubiquinone/menaquinone_biosynthesis-like_protein_n=1_Tax=Methylibium_petroleiphilum_(strain_PM1)_RepID=A2SDE0_METPP
OG_11728							0.81	0.29	0.34	0.16	0.65	0.29
OG_11729							1.2	0	0.34	0	0.26	0
OG_1173	0	1.03	0	0.32	8.79	10.64	0	0.73	0	0.16	6.2	12.1	UniRef90_A0A016UP02_Uncharacterized_protein_n=2_Tax=Ancylostoma_ceylanicum_RepID=A0A016UP02_9BILA
OG_11730	0	0	0	0	0.13	0	0.09	0	0.17	0.08	0	0	UniRef90_A3XG81_Uncharacterized_protein_n=1_Tax=Leeuwenhoekiella_blandensis_(strain_CECT_7118_/_CCUG_51940_/_MED217)_RepID=A3XG81_LEEBM
OG_11731							10.33	1.91	4.2	2.16	8.14	1.46
OG_11732	0	0	0	0	0	0	0	0	0	0	0	0
OG_11733	0	0	0	0	0	0	0	0	0	0	0	0	UniRef90_A0A0D0L244_Contig_9,_whole_genome_shotgun_sequence_n=1_Tax=Flavobacterium_sp._MEB061_RepID=A0A0D0L244_9FLAO
OG_11734							0.95	1.76	1.34	1.28	0.65	0.29
OG_11735							0	0	0	0	0	0
OG_11736							0.19	0.15	0.34	1.68	0.9	0.73	UniRef90_Q113E0_Methyltransferase_type_11_n=1_Tax=Trichodesmium_erythraeum_(strain_IMS101)_RepID=Q113E0_TRIEI
OG_11737	0	0	0	0	0	0	0.05	0.15	7.9	0	0.13	0	UniRef90_K9SDN6_Uncharacterized_protein_n=1_Tax=Pseudanabaena_sp._PCC_7367_RepID=K9SDN6_9CYAN
OG_11738							1.28	3.08	0.67	0.16	0.65	0.29
OG_11739	0	0	0	0	0	0	0	0	0	0	0	0	UniRef90_M5DS38_ThiF_family_protein_n=2_Tax=Thalassolituus_oleivorans_RepID=M5DS38_9GAMM
OG_1174	0	0.44	1.01	0.72	0.39	0.44	285.26	378.85	181.68	301.72	215.52	76.25	UniRef90_Q116P7_Oxygen-dependent_coproporphyrinogen-III_oxidase_n=1_Tax=Trichodesmium_erythraeum_(strain_IMS101)_RepID=Q116P7_TRIEI
OG_11740							0	0	0	0.24	0	0	UniRef90_A7S580_Predicted_protein_n=1_Tax=Nematostella_vectensis_RepID=A7S580_NEMVE
OG_11741	0	0	0	0	0	0	0	0	0	0	0	0	UniRef90_UPI0005C48322_hypothetical_protein_n=1_Tax=Phaeodactylibacter_xiamenensis_RepID=UPI0005C48322
OG_11742							0	0	0	0	0	0	UniRef90_UPI0005C48322_hypothetical_protein_n=1_Tax=Phaeodactylibacter_xiamenensis_RepID=UPI0005C48322
OG_11743							0.19	0.29	0.84	0.08	0	0	UniRef90_Q10VC6_Transposase,_IS4_family_n=3_Tax=Trichodesmium_erythraeum_(strain_IMS101)_RepID=Q10VC6_TRIEI
OG_11744							0	5.28	0	3.76	0	1.31
OG_11745	0	0	0	0	0	0	0	0	0	0	0	0	UniRef90_B8KGK6_Peptidase_S49_n=1_Tax=gamma_proteobacterium_NOR5-3_RepID=B8KGK6_9GAMM
OG_11746							13.22	2.5	11.93	1.76	2.84	0.29	UniRef90_A0YVW9_Uncharacterized_protein_n=1_Tax=Lyngbya_sp._(strain_PCC_8106)_RepID=A0YVW9_LYNSP
OG_11747	0	0.15	1.34	0	0	0	2.56	0.29	2.18	0	0	0	UniRef90_A7HRD3_Uncharacterized_protein_n=1_Tax=Parvibaculum_lavamentivorans_(strain_DS-1_/_DSM_13023_/_NCIMB_13966)_RepID=A7HRD3_PARL1
OG_11748	0	0.44	0	0	0	0	0	0.15	0	0.08	0.13	0	UniRef90_L8JL51_Mobile_element_protein_n=2_Tax=Fulvivirga_RepID=L8JL51_9BACT
OG_11749							0.47	0.29	2.69	0.32	0	0
OG_1175	0	0.29	0	0	0.26	0.15	0	0	0	0	0	0	UniRef90_A0A098RYP9_Uncharacterized_protein_n=2_Tax=Bacteria_RepID=A0A098RYP9_9SPHI
OG_11750							1.33	0.29	0	0	0	0
OG_11751							0	0.15	0.17	0.08	0.13	0
OG_11752							0	0	0	0	0	0
OG_11753							4904.41	78.38	429.75	1.6	2.84	3.35
OG_11754	0	0	0	0	0	0	0	0	0	0	0	0
OG_11755							9.86	2.35	2.52	1.52	1.55	0.87	UniRef90_Q10YG6_Uncharacterized_protein_n=1_Tax=Trichodesmium_erythraeum_(strain_IMS101)_RepID=Q10YG6_TRIEI
OG_11756							167.36	48	30.25	0.64	3.1	1.9
OG_11757	0	0	0	0	0	0	0	0	0	0	0	0
OG_11758							0	17.32	0	7.36	0	3.64
OG_11759							0.09	0.44	0.34	1.68	0.65	0	UniRef90_Q10WW1_ATPase-like_protein_n=2_Tax=Trichodesmium_erythraeum_RepID=Q10WW1_TRIEI
OG_1176	0.19	0.15	0.34	0.32	1.16	0.15	10.28	10.57	26.72	8	8.14	3.35	UniRef90_F4L729_MazG_family_protein_n=1_Tax=Haliscomenobacter_hydrossis_(strain_ATCC_27775_/_DSM_1100_/_LMG_10767_/_O)_RepID=F4L729_HALH1
OG_11760							0	0.29	0.5	0.96	0.13	0	UniRef90_Q10WW0_Uncharacterized_protein_n=2_Tax=Trichodesmium_erythraeum_RepID=Q10WW0_TRIEI
OG_11761							0.33	0.29	0.67	0	0.13	0
OG_11762							0	0.29	0	0	0	0
OG_11763							0	0	0	0	0	0
OG_11764							0.19	0	0.5	0.48	0	0	UniRef90_UPI00063FC3CB_glycosyltransferase_n=1_Tax=Trichodesmium_erythraeum_RepID=UPI00063FC3CB
OG_11765							9.66	0.73	6.22	0.48	1.94	0.73	UniRef90_UPI0006933D24_hypothetical_protein_n=1_Tax=Hassallia_byssoidea_RepID=UPI0006933D24
OG_11766							2.23	6.9	1.18	2.88	4.52	0.29	UniRef90_A0A073CK23_Uncharacterized_protein_n=1_Tax=Planktothrix_agardhii_NIVA-CYA_126/8_RepID=A0A073CK23_PLAAG
OG_11767	0.19	0	0	0	0.13	0	0	0	0	0	0	0	UniRef90_A0A081CAR6_Glycosyltransferase_n=1_Tax=bacterium_UASB270_RepID=A0A081CAR6_9BACT
OG_11768							19.62	13.36	10.76	6.08	9.04	3.64	UniRef90_Q10W11_Uncharacterized_protein_n=2_Tax=Trichodesmium_erythraeum_RepID=Q10W11_TRIEI
OG_11769							0.05	0	0	0	0	0
OG_1177	0.05	0.88	0.17	1.28	1.16	0.73	54.07	169.24	60.67	223.83	156.47	34.26	UniRef90_A0A098S1W3_Ribosomal_protein_S12_methylthiotransferase_RimO_n=2_Tax=Bacteria_RepID=A0A098S1W3_9SPHI
OG_11770							1.09	0.29	1.01	1.76	1.42	0.44	UniRef90_Q10XN2_Anion_transporter_n=2_Tax=Trichodesmium_erythraeum_RepID=Q10XN2_TRIEI
OG_11771	0	0	0	0	0	0	0.05	0	0	0	0	0
OG_11772	0	0	0	0	0	0	0	0	0	0	0.13	0	UniRef90_A1ZLY7_Uncharacterized_protein_n=2_Tax=Microscilla_marina_RepID=A1ZLY7_9BACT
OG_11773							1.14	1.61	1.01	0	0.26	0	UniRef90_UPI00047DE597_hypothetical_protein_n=1_Tax=Planktothrix_prolifica_RepID=UPI00047DE597
OG_11774							0.09	0.15	0.34	0	0	0
OG_11775							0.81	56.51	7.73	4.96	5.43	2.04
OG_11776							0	0	0	0	0	0
OG_11777							0	0	0	0	0	0
OG_11778							0	0	0	0.08	0	0	UniRef90_W4YVJ9_Uncharacterized_protein_n=1_Tax=Strongylocentrotus_purpuratus_RepID=W4YVJ9_STRPU
OG_11779	0	0	0	0	0	0	0	0	0	0	0	0	UniRef90_H6L1P5_Uncharacterized_protein_n=2_Tax=Saprospira_grandis_RepID=H6L1P5_SAPGL
OG_1178	1.8	0.73	0.34	1.44	1.29	0.73	0	0	0	0	0	0	UniRef90_A0A098S8B5_2-methylthioadenine_synthetase_n=1_Tax=Phaeodactylibacter_xiamenensis_RepID=A0A098S8B5_9SPHI
OG_11780	0	0	0	0	0	0	0	0	0	0	0	0	UniRef90_UPI00056F0FDD_hypothetical_protein_n=2_Tax=Verrucomicrobia_bacterium_SCGC_AAA168-F10_RepID=UPI00056F0FDD
OG_11781	0	0	0	0	0	0	0	0	0	0	0	0	UniRef90_A0A023BW58_Beta-lactamase_n=2_Tax=Aquimarina_RepID=A0A023BW58_9FLAO
OG_11782	0	0	0	0	0	0	0	0	0	0	0	0	UniRef90_Q7UJH0_Hypothetical_acetyltransferase_n=7_Tax=Rhodopirellula_RepID=Q7UJH0_RHOBA
OG_11783	0	0	0	0.08	0	0	0	0	0	0	0	0	UniRef90_A1ZHI0_Phosphatidylserine_decarboxylase_proenzyme_n=1_Tax=Microscilla_marina_ATCC_23134_RepID=A1ZHI0_9BACT
OG_11784	0	0.29	0	0.24	0	0	0	0	0	0	0	0	UniRef90_H6L0Z0_Uncharacterized_protein_n=2_Tax=Saprospira_grandis_RepID=H6L0Z0_SAPGL
OG_11785	0	0	0	0	0	0	0	0	0	0	0	0	UniRef90_H6L5C2_Lipoprotein,_putative_n=2_Tax=Saprospira_grandis_RepID=H6L5C2_SAPGL
OG_11786	0	0	0	0	0	0	0	0	0	0	0	0	UniRef90_UPI0006961E67_hypothetical_protein_n=1_Tax=Aureispira_sp._CCB-QB1_RepID=UPI0006961E67
OG_11787	0	0	0	0	0.13	0	0	0	0	0	0	0	UniRef90_UPI000696FB50_hypothetical_protein_n=1_Tax=Aureispira_sp._CCB-QB1_RepID=UPI000696FB50
OG_11788	0.05	0	0	0.08	0.13	0.15	0	0	0	0	0	0	UniRef90_UPI0004131807_helicase_n=1_Tax=Adhaeribacter_aquaticus_RepID=UPI0004131807
OG_11789	0	0	0	0	0	0	0	0	0	0	0	0	UniRef90_UPI000698BACD_hypothetical_protein_n=1_Tax=Aureispira_sp._CCB-QB1_RepID=UPI000698BACD
OG_1179	0.14	3.67	1.01	0.96	1.16	0.87	65.82	158.67	88.74	165.62	80.11	20.99	UniRef90_Q114K1_Phosphate_acyltransferase_n=2_Tax=Trichodesmium_erythraeum_RepID=PLSX_TRIEI
OG_11790	0	0	0	0	0	0	0	0	0	0	0	0	UniRef90_UPI000378D723_hypothetical_protein_n=1_Tax=Gracilimonas_tropica_RepID=UPI000378D723
OG_11791	0	0	0	0.08	0	0	0	0	0	0	0	0	UniRef90_UPI000697CBC5_hypothetical_protein_n=1_Tax=Aureispira_sp._CCB-QB1_RepID=UPI000697CBC5
OG_11792	0	0.15	0	0	0	0	0	0	0	0	0	0	UniRef90_UPI0006989275_hypothetical_protein_n=1_Tax=Aureispira_sp._CCB-QB1_RepID=UPI0006989275
OG_11793	0	0	0	0.08	0	0	0	0	0	0	0	0	UniRef90_UPI000696EA3F_hypothetical_protein_n=1_Tax=Aureispira_sp._CCB-QB1_RepID=UPI000696EA3F
OG_11794	0	0.15	0	0.16	0	0	0	0	0	0	0	0	UniRef90_UPI00040CE58F_T9SS_C-terminal_target_domain-containing_protein_n=1_Tax=Aquimarina_latercula_RepID=UPI00040CE58F
OG_11795	0	0	0.17	0.32	0	0	0	0	0	0	0	0	UniRef90_UPI000696E04D_hypothetical_protein_n=1_Tax=Aureispira_sp._CCB-QB1_RepID=UPI000696E04D
OG_11796	0	0	0	0	0	0	0	0	0	0	0	0	UniRef90_UPI0006990868_hypothetical_protein_n=1_Tax=Aureispira_sp._CCB-QB1_RepID=UPI0006990868
[truncated: 73,531 more rows]
