# Supplementary material for: Trichodesmium physiological ecology and phosphate reduction in the western Tropical South Pacific
Source: Copernicus journal article supplement (doi:10.5194/bg-2018-143), 2018-04-11
Supplement: Supplementary file 1 [file supp_table1_geochem_summary.xlsx]

## Sheet: Sheet1
Station	Lat	Lon	Water colum phosphate (uM)		Water column phosphate turnover (1/hr)		Water column phosphate uptake rate (umol/L/hr)	Water column iron (nmol)	Tricho. colony: % of PO4 uptake as MPn		Tricho. colony: % PO4 uptake as PO3		Sum MPn PO3 (%)
			avg	stdev	avg	stdev			avg	stdev	avg	stdev
SD1	-18	159.901	0.0352976	0.0203432				0.67
SD2	-18.6223	162.115	0.025	0.0057735				0.385	0.826437	0.116559	1.04518	0.326903	1.87162
SD3	-19.4982	165.001	0.0136508	0.00590137	0.0251265	0.00127681	0.000342997	0.35
LDA	-19.2428	164.64	0.0293333	0.012228	0.0493767	0.00308881	0.00144838		0.545586	0.118689	0.554668	0.000872005	1.10025
SD4	-19.9995	168	0.03496	0.021284				0.69
SD5	-22.0008	170	0.03846	0.0278811	0.00260763	0.000387691	0.000100289	0.44
SD6	-21.371	172.117	0.0283421	0.0110395
SD7	-20.7697	174.25	0.0275526	0.0149183	0.00293293	1.46184e-05	8.081e-05	0.21
SD8	-20.7027	176.378	0.00821053		0.00120814	0.000871328	9.91943e-06	0.38
SD9	-20.9687	178.643	0.00610526		0.0388792	0.000444154	0.000237368	0.22	0.579056	0.143808	0.773547	0.00477554	1.3526
SD10	-20.4535	-178.51	0.00610526	0.000744323				0.7
SD11	-19.9882	-175.667	0.0241579	0.0183445	0.0365547	0.000240783	0.000883084	1.16	0.338293	0.00486217	0.546209	0.00901143	0.884501
SD12	-19.5237	-172.788	0.0733333	0.011547	0.00192657	0.000764454	0.000141281
LDB*	-18.1877	-170.666	0.0298016	0.0109486	0.0694248	0.00443861	0.00206897	0.65	1.20256	0.284958	0.80124	0.376369	2.0038
SD13	-18.2007	-169.073	0.14	0.01
LDC	-18.4158	-165.939	0.152857	0.0306827	0.504058	0.278547	0.0770488	0.37
SD14	-18.395	-163.001	0.146667	0.0057735				0.46
SD15	-18.2682	-159.999	0.166667	0.0057735				0.3075

## Sheet: Sheet2
CladeI 5m cells/mL	CladeIII 5m cells/mL	III/Sum	% of PO4 uptake as MPn	% PO4 uptake as PO3	Sum MPn PO3 (%)	MPn/Sum	PO3/Sum	Station
								SD1
78681.7	21452.4	0.214237	0.826437	1.04518	1.87162	0.441562	0.558438	SD2
								SD3
			0.545586	0.554668	1.10025	0.495873	0.504127	LDA
24450.1	22152	0.475344						SD4
								SD5
82856.4	23110.8	0.218094						SD6
								SD7
								SD8
20587.2	9164.47	0.308032	0.579056	0.773547	1.3526	0.428105	0.571895	SD9
								SD10
36343.3	28713.6	0.441361	0.338293	0.546209	0.884501	0.382467	0.617533	SD11
2990.12	2011.18	0.402131						SD12
			1.20256	0.80124	2.0038	0.615185	0.39986	LDB (avg)
