# Supplementary figures and images for: Trichodesmium physiological ecology and phosphate reduction in the western Tropical South Pacific
Source: Copernicus journal article supplement (doi:10.5194/bg-2018-143), 2018-04-11

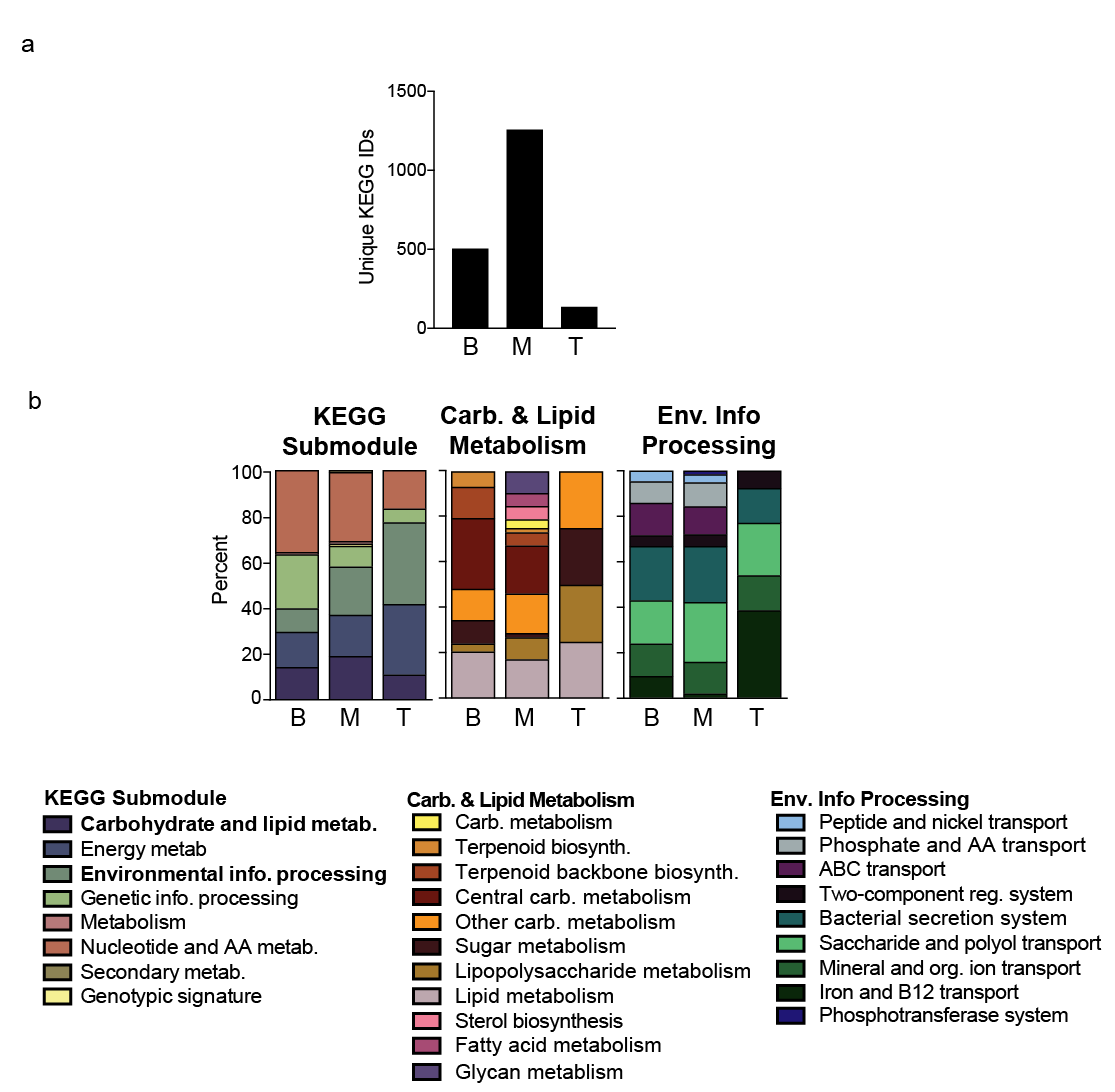

Supplement: Supplementary file 1 [file bg-2018-143-supplement.zip › supp1_kegg_metaG-01.png]

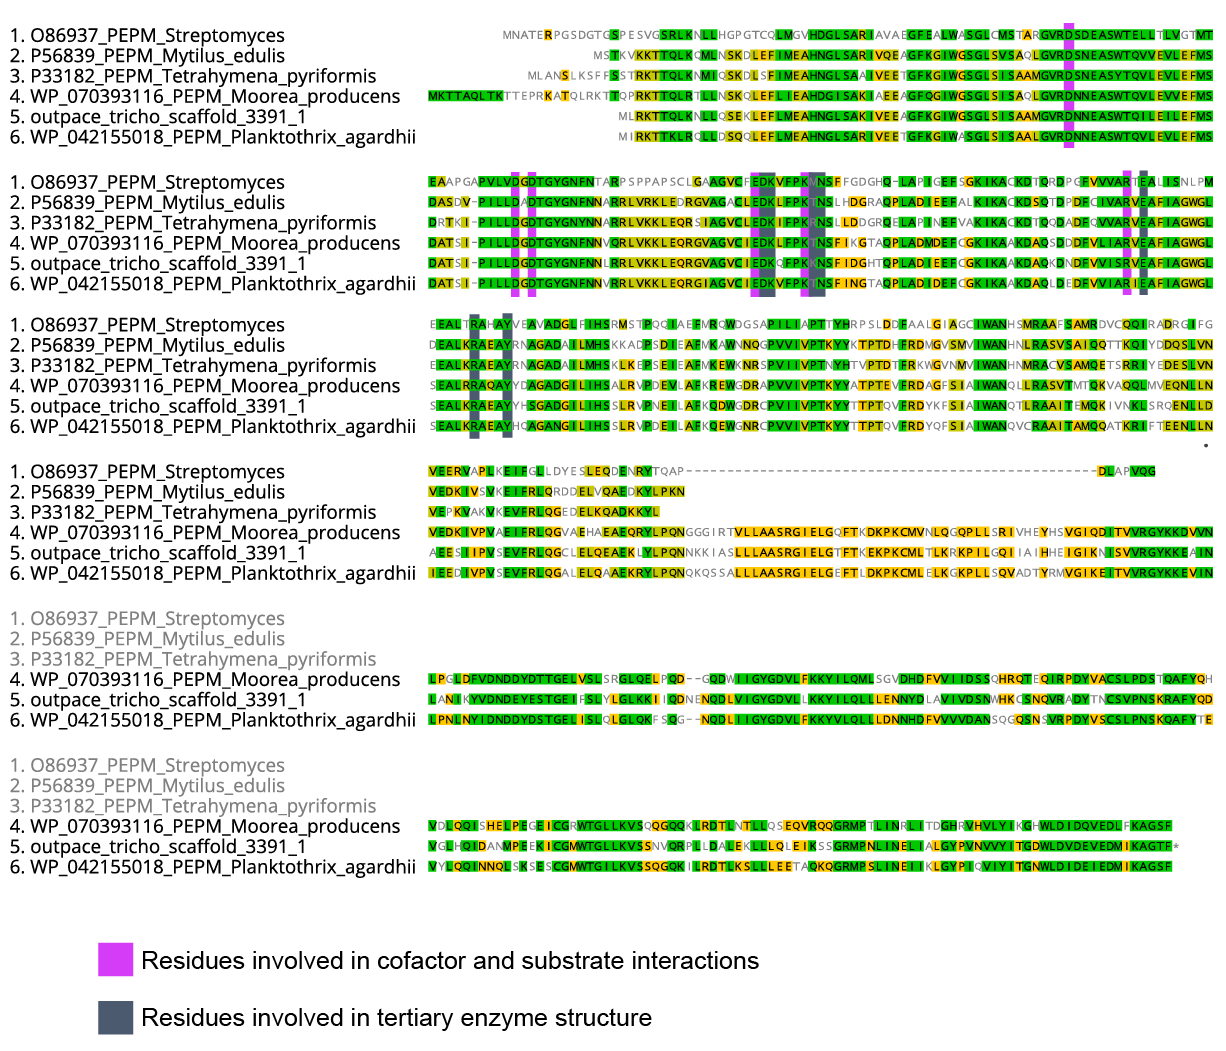

Supplement: Supplementary file 1 [file bg-2018-143-supplement.zip › supp2_ppm_ali-01.png]

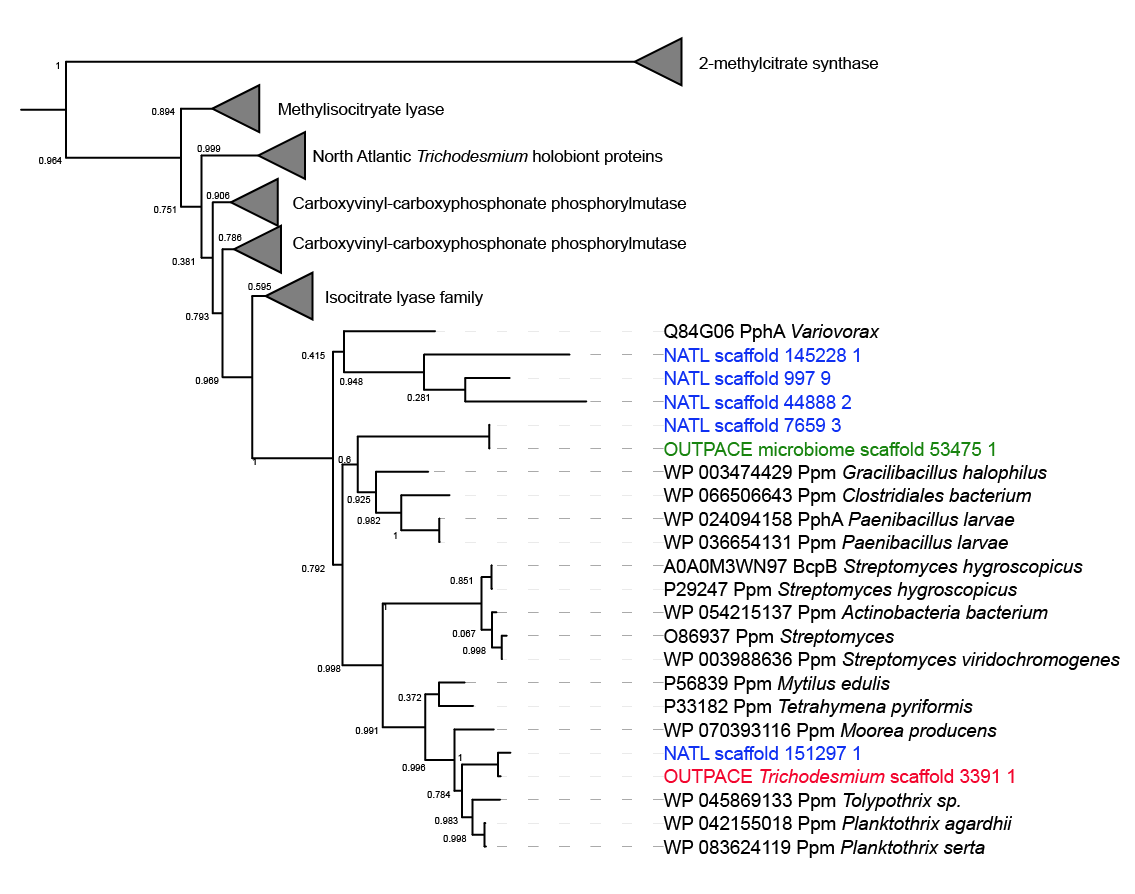

Supplement: Supplementary file 1 [file bg-2018-143-supplement.zip › supp3_ppm_tree-01.png]
